1 **Formicine ants swallow their highly acidic poison for gut microbial selection and control**

2 Simon Tragust<sup>1†\*</sup>, Claudia Herrmann<sup>1</sup>, Jane Häfner<sup>1</sup>, Ronja Braasch<sup>1</sup>, Christina Tilgen<sup>1</sup>, Maria  
3 Hooek<sup>1</sup>, Margarita Artemis Milidakis<sup>1</sup>, Roy Gross<sup>2</sup>, Heike Feldhaar<sup>1</sup>

4

5 <sup>1</sup> Animal Ecology I, Bayreuth Center for Ecology and Environmental Research (BayCEER),  
6 University of Bayreuth, Universitätsstraße 30, 95447 Bayreuth, Germany

7 <sup>2</sup> Microbiology, Biocenter, University of Würzburg, Am Hubland, 97074 Würzburg

8 † Present address: General Zoology, Hoher Weg 8, Martin-Luther University, 06120 Halle  
9 (Saale), Germany

10 \* Correspondence to: [simon.tragust@zoologie.uni-halle.de](mailto:simon.tragust@zoologie.uni-halle.de)

11

## 12 **Abstract**

13 Animals continuously encounter microorganisms that are essential for health or cause disease.  
14 They are thus challenged to control harmful microbes while allowing acquisition of beneficial  
15 microbes, a challenge that is likely especially important concerning microbes in food and in  
16 animals such as social insects that exchange food among colony members. Here we show that  
17 formicine ants actively swallow their antimicrobial, highly acidic poison gland secretions  
18 after feeding. The ensuing creation of an acidic environment in the stomach, the crop,  
19 improves individual survival in the face of pathogen contaminated food and limits disease  
20 transmission during mutual food exchange. At the same time, crop acidification selectively  
21 allows acquisition and colonization by known bacterial gut associates. The results of our  
22 study suggest that swallowing of acidic poison gland secretions acts as a microbial filter in  
23 formicine ants and indicate a potentially widespread but so far underappreciated dual role of  
24 antimicrobials in host-microbe interactions.

25

## 26 **Introduction**

27 Animals commonly harbor gut associated microbial communities (Engel and Moran, 2013,  
28 Moran et al., 2019). Patterns of recurring gut microbial communities have been described for  
29 many animal groups (Brune and Dietrich, 2015, Kwong et al., 2017, Ochman et al., 2010).  
30 The processes generating these patterns are however often not well understood. They might  
31 result from host filtering (Mazel et al., 2018), codiversification between gut associated  
32 microbes and their hosts (Moeller et al., 2016) or simply be the result of similar dietary  
33 preferences (Anderson et al., 2012, Hammer et al., 2017).  
34 Food is an important environmental source of bacterial gut associates (Blum et al., 2013,  
35 Broderick and Lemaitre, 2012, David et al., 2014, Hammer et al., 2017, Perez-Cobas et al.,

36 2015) but also poses a challenge, the need to discriminate between harmful and beneficial  
37 microbes, as food may contain microbes that produce toxic chemicals or that are pathogenic  
38 (Burkpile et al., 2006, Demain and Fang, 2000, Janzen, 1977, Trienens et al., 2010). In social  
39 animals, control of harmful microbes in food while at the same time allowing the acquisition  
40 and transmission of beneficial microbes from and with food, is likely especially important.  
41 Eusocial Hymenoptera not only transport and store food in their stomach, the crop, but also  
42 distribute food to members of their colony via trophallaxis, i.e. the regurgitation of crop  
43 content from donor individuals to receiver individuals through mouth-to-mouth feeding  
44 (Gernat et al., 2018, Greenwald et al., 2018, LeBoeuf et al., 2016). While trophallaxis can  
45 facilitate the transmission of beneficial microbes, from an epidemiological perspective it can  
46 also entail significant costs, as it might open the door to unwanted microbial opportunists and  
47 pathogens that can take advantage of these transmission routes (Onchuru et al., 2018, Salem et  
48 al., 2015).

49 Here we investigate how formicine ants, specifically the Florida carpenter ant *Camponotus*  
50 *floridanus*, solve the challenge to control harmful microbes in their food while allowing  
51 acquisition and transmission of beneficial microbes from and with their food. Apart from  
52 specialized intracellular endosymbionts associated with the midgut in the ant tribe  
53 Camponotini (Degnan et al., 2004, Feldhaar et al., 2007, Russell et al., 2017, Williams and  
54 Wernegreen, 2015), formicine ant species have only low abundances of microbial associates  
55 in their gut lumen but carry members of the bacterial family Acetobacteraceae as a major part  
56 of their gut microbiota (Brown and Wernegreen, 2016, Chua et al., 2018, He et al., 2011,  
57 Ivens et al., 2018). Some formicine gut associated Acetobacteraceae show signs of genomic  
58 and metabolic adaptations to their host environment indicating coevolution (Brown and  
59 Wernegreen, 2019). But the recurrent presence of Acetobacteraceae in the gut of formicine ants  
60 potentially also reflects direct transmission of bacteria among individuals, selective uptake on

61 the part of the ants, specific adaptation for colonizing ant guts on the part of the bacteria, or  
62 some combination of all three (Engel and Moran, 2013).

63 Generally, the immune system together with physiochemical properties of the gut  
64 environment maintains the homeostasis between gut associated microbes and the host (Chu  
65 and Mazmanian, 2013, McFall-Ngai et al., 2013, Rakoff-Nahoum et al., 2004, Slack et al.,  
66 2009, Watnick and Jugder, 2020, Xiao et al., 2019, see also Foster et al., 2017). Highly acidic  
67 stomach lumens are ubiquitous in higher vertebrates, including amphibians, reptiles, birds and  
68 mammals (Beasley et al., 2015, Koelz, 1992), while in insects, acidic regions have rarely been  
69 described so far from midgut regions (Chapman, 2013, Holtof et al., 2019). However in both,  
70 higher vertebrates, and the fruit fly *Drosophila melanogaster*, acidic gut compartments  
71 together with the immune system serve microbial control and prevent infection by pathogens  
72 (Giannella et al., 1972, Howden and Hunt, 1987, Martinsen et al., 2005, Overend et al., 2016,  
73 Rakoff-Nahoum et al., 2004, Slack et al., 2009, Tennant et al., 2008, Watnick and Jugder,  
74 2020). Formicine ant species possess a highly acidic poison gland secretion containing formic  
75 acid that is foremost used as a defensive weapon but is also distributed to the environment of  
76 these ants as an external immune defence trait (*sensu* Otti et al., 2014), to protect their  
77 offspring and the nest and to limit disease spread within the society (see references in Tragust,  
78 2016, Brüttsch et al., 2017, Pull et al., 2018). Thereby, ants can take up poison gland  
79 secretions from the acidopore, the opening of the poison gland at the gaster tip, into their  
80 mouth during a specialized behaviour existing only in a subset of ant families among all  
81 Hymenopterans (Basibuyuk and Quicke, 1999, Farish, 1972), termed acidopore grooming  
82 (Tragust et al., 2013).

83 Here we first investigate whether poison gland substances are also swallowed during  
84 acidopore grooming in *C. floridanus* and seven other formicine ant species from three genera  
85 in a comparative survey through measurement of pH levels in the crop and midgut lumen,

86 experimental manipulation of poison gland access, and behavioural observations. In loss of  
87 poison gland function experiments, we then investigate whether analogous to acidic stomachs  
88 of higher vertebrates and acidic midgut regions in the fruit fly, swallowing of poison gland  
89 substances can serve gut microbial control and prevent bacterial pathogen infection and  
90 transmission. Finally, we explore whether swallowing of poison gland substances acts as a  
91 microbial filter that is permissible to gut colonization of bacteria from the family  
92 Acetobacteracea.

93

## 94 **Results and Discussion**

95 To reveal whether poison gland secretions are swallowed during acidopore grooming, we  
96 monitored acidity levels in the crop lumen of the Florida carpenter ant *Camponotus floridanus*  
97 at different time points after feeding them 10% honey water (pH = 5). We found that over  
98 time, the crop lumen became increasingly acidic, reaching highly acidic values 48h after  
99 feeding (median pH = 2; 95% CI: 1.5-3.4), whilst renewed access to food after 48h restored  
100 the pH to levels recorded after the first feeding trial (Fig. 1a; LMM, LR-test,  $\chi^2 = 315.18$ , df =  
101 3,  $P < 0.001$ ; Westfall corrected post-hoc comparisons: 0+4h vs. 48h+4h:  $P = 0.317$ , all other  
102 comparisons:  $P < 0.001$ ). This acidification was limited to the crop and did not extend to the  
103 midgut (Fig. 1 – figure supplement 1; pH-measurements at four points along the midgut 24h  
104 after access to 10% honey-water; mean  $\pm$  se; midgut position 1 =  $5.08 \pm 0.18$ , midgut position  
105 2 =  $5.28 \pm 0.17$ , midgut position 3 =  $5.43 \pm 0.16$ , midgut position 4 =  $5.31 \pm 0.19$ ). Prevention  
106 of acidopore grooming in *C. floridanus* ants for 24h after feeding resulted in a significantly  
107 diminished acidification of the crop lumen (Fig. 1b; LMM, LR-test,  $\chi^2 = 44.68$ , df = 1,  $P <$   
108 0.001), a result that was invariably obtained in a comparative survey across seven formicine  
109 ant species (genera: *Camponotus*, *Lasius* and *Formica*) (Fig. 1c; two-sided Wilcoxon rank  
110 sum tests, all comparisons:  $P \leq 0.036$ ). This indicates that after feeding, crop lumens of

111 formicine ants are acidified through swallowing of poison gland secretions during acidopore  
112 grooming. Although venomous animals often bear a cost of venom production and express  
113 behavioural adaptations to limit venom expenditure (Casewell et al., 2013), *C. floridanus*  
114 increases the frequency of acidopore grooming upon ingestion of food but also after ingestion  
115 of water (Fig. 1 - figure supplement 2; GLMM, LR-test,  $\chi^2 = 33.526$ ,  $df = 2$ ,  $P < 0.001$ ;  
116 Westfall corrected post-hoc pairwise comparisons, water vs. 10% honey-water:  $P = 0.634$ ,  
117 unfed vs water and unfed vs 10% honey-water:  $P < 0.001$ ). This suggests a prophylactic  
118 acidification of crop lumens after fluid ingestion, irrespective of the fluids nutritional value.

119 To test whether crop lumen acidification serves microbial control and prevents infection by  
120 pathogens, we prevented acidopore grooming in *C. floridanus* ants for 24h after feeding them  
121 either honey water contaminated with *Serratia marcescens*, an insect pathogenic bacterium  
122 (Grimont and Grimont, 2006), or non-contaminated honey water. We found that acidopore  
123 access after pathogen ingestion increased the survival probability of ants (Fig. 2a). The  
124 survival of ants prevented from acidopore grooming and fed with pathogen contaminated food  
125 was significantly lower than that of non-prevented ants fed with the same food source, the  
126 latter not differing in survival to similarly manipulated ants that were fed a non-contaminated  
127 food source (COXME, LR-test,  $\chi^2 = 20.95$ ,  $df = 3$ ,  $P = 0.0001$ ; Westfall corrected post-hoc  
128 comparisons: FA - | *Serratia* presence + vs. all other ant groups:  $P \leq 0.027$ , all other  
129 comparisons:  $P \geq 0.061$ ). Food sanitation with antimicrobials that are either self-produced or  
130 derived from the environment or symbiotic associations (Otti et al., 2014) is ubiquitous in  
131 animals that provision food to their offspring or that store, cultivate, develop or live in food  
132 (Cardoza et al., 2006, Currie et al., 1999, Herzner et al., 2013, Herzner and Strohm, 2007,  
133 Joop et al., 2014, Milan et al., 2012, Mueller et al., 2005, Scott et al., 2008, Shukla et al.,  
134 2018, Vander Wall, 1990, Vogel et al., 2017). The results of our study indicate that formicine  
135 ants not only distribute acidic poison gland secretions to the environment as an external

136 immune defence trait (see references in Tragust, 2016, Brüttsch et al., 2017, Pull et al., 2018),  
137 but also use them to sanitize ingested food.

138 Crop lumen acidification in formicine ants upon ingestion of pathogen contaminated food  
139 may not only improve individual survival but might also limit oral disease transmission  
140 during food distribution via trophallaxis within a social insect society. To test an immune  
141 functional role of crop lumen acidification during trophallaxis, we created two types of donor-  
142 receiver ant pairs. Donor ants in both pairs were directly fed *S. marcescens* contaminated  
143 food, while receiver ants obtained food only through trophallaxis with their respective donor  
144 ants. Receiver ants in both pairs were precluded from crop acidification through blockage of  
145 their acidopore opening, while donor ants were blocked in one pair but only sham blocked in  
146 the other pair. We found that acidopore blockage *per se* had a significant negative effect on  
147 the survival of donor as well as receiver ants (Fig. 2b; COXME, LR-test,  $\chi^2 = 66.68$ ,  $df = 3$ ,  $P$   
148  $< 0.001$ ). Importantly however, although receiver ants that obtained food from donors with  
149 the ability to acidify their crop lumen died at a higher rate than their respective donor  
150 counterparts (hazard ratio: 1.81; Westfall corrected post-hoc comparison:  $P < 0.001$ ) they  
151 were approximately only half as likely to die compared to receiver ants that obtained  
152 pathogen contaminated food from blocked donors unable to acidify their crop lumen (hazard  
153 ratio: 0.56; Westfall corrected post-hoc comparison:  $P < 0.001$ ). Trophallactic behaviour  
154 between the two donor-receiver ant pairs was not different (Fig. 2 – figure supplement 1;  
155 LMM, LR-test,  $\chi^2 = 1.23$ ,  $df = 1$ ,  $P = 0.268$ ). Although an antimicrobial activity of formicine  
156 ant trophallactic fluids has been linked to the presence of proteins in previous studies  
157 (Hamilton et al., 2011, LeBoeuf et al., 2016), the results of our study suggest a major role of  
158 crop lumen acidification through the ingestion of poison gland substances. Prophylactic  
159 acidification of the crop lumen after feeding in *C. floridanus* might therefore act as an  
160 important barrier to disease spread within the colony and alleviate the cost of sharing

161 pathogen contaminated food (Onchuru et al., 2018, Salem et al., 2015). Together with other  
162 parasite defence traits in social insect societies (Cremer et al., 2007, Stroeymeyt et al., 2018),  
163 acidification of crop lumens likely effectively counteracts the generally increased risk of  
164 pathogen exposure and transmission associated with group-living (Alexander, 1974,  
165 Boomsma et al., 2005, Kappeler et al., 2015)

166 In addition to pathogen control, the acidification of the crop lumen might act as a chemical  
167 filter for gut associated microbial communities in formicine ants, similar to gut morphological  
168 structures that can act as mechanical filters in ants and other insects (Itoh et al., 2019, Lanan  
169 et al., 2016, Ohbayashi et al., 2015). To investigate the idea of a chemical filter, we tested the  
170 ability of the pathogenic bacterium *S. marcescens*, and the insect gut associated bacterium  
171 *Asaia* sp. (family Acetobacteraceae) to withstand acidic environments *in vitro* and *in vivo*.  
172 Incubation of *S. marcescens* in 10% honey water acidified with formic acid for 2h resulted in  
173 a significantly reduced growth at pH 4 compared to 5, with zero growth at pH-levels less than  
174 4 (Fig. 3 – figure supplement 1a; GLM, LR-test,  $\chi^2 = 79.442$ ,  $df = 1$ ,  $P < 0.001$ ). Consistent  
175 with this, when fed to *C. floridanus*, *S. marcescens* presence decreased sharply over time in  
176 the crop (Fig. 3a; GLMM, LR-test,  $\chi^2 = 220.78$ ,  $df = 4$ ,  $P < 0.001$ ) with the proportion of  
177 CFUs at 0.5h post-feeding relative to 0h in the crop diminishing from 48% (median, CI: 0-  
178 366%) to 0% at 4h (CI: 0-4%), 24h (CI: 0-2.7%), and 48h (CI: 0-21%) post-feeding. In  
179 addition, *S. marcescens* could only be detected at extremely low levels (median: 0%) in the  
180 midgut at 0h (CI: 0-5%), 0.5h (CI: 0-1%) and 24h (CI: 0-1%) post-feeding relative to 0h in  
181 the crop and not at all at 4h and 48h post-feeding (Fig. 3b; GLMM, LR-test,  $\chi^2 = 1.044$ ,  $df =$   
182  $2$ ,  $P = 0.593$ ). Taken together, *in vivo* and *in vitro* tests suggest that crop acidification results  
183 in a quick and effective reduction of *S. marcescens* viability in the crop thus preventing  
184 further transport to the midgut. The same results were obtained *in vivo* for *E. coli*, a bacterium  
185 that is not a gut associate of insects (Blount, 2015) (Fig. 3 – figure supplement 2; crop:



186 GLMM, LR-test,  $\chi^2 = 156.74$ ,  $df = 4$ ,  $P < 0.001$ ; midgut: GLMM, LR-test,  $\chi^2 = 14.898$ ,  $df = 3$ ,  
187  $P = 0.002$ ). In contrast to *S. marcescens*, *Asaia* sp. was able to grow in 10% honey water  
188 acidified with formic acid to a pH of 3 for 2h in *in vitro* tests (Fig. 3 – figure supplement 1b;  
189 GLM, overall LR-test  $\chi^2 = 21.179$ ,  $df = 2$ ,  $P < 0.001$ ; Westfall corrected post hoc  
190 comparisons: pH = 5 vs. pH = 4:  $P = 0.234$ , all other comparisons:  $P < 0.001$ ). Moreover, in  
191 *in vivo* tests, *Asaia* sp. only gradually diminished over time in the crop (Fig. 3c; GLMM; LR-  
192 test,  $\chi^2 = 124.01$ ,  $df = 4$ ,  $P < 0.001$ ) with 34% (median, CI: 3-85%) and 2% (CI: 0-7%)  
193 relative to 0h in the crop still detectable at 4h and 24h post-feeding, respectively. At the same  
194 time *Asaia* sp. steadily increased in the midgut (Fig. 3d; GLMM; LR-test,  $\chi^2 = 59.94$ ,  $df = 3$ ,  $P$   
195  $< 0.001$ ) from its initial absence at 0h post-feeding to 2% (median, CI: 0-5%) relative to 0h in  
196 the crop at 48h post-feeding. This indicates that crop lumen acidification is permissible to gut  
197 colonization by *Asaia* sp.. Given the ubiquitous presence of crop lumen acidification in our  
198 comparative survey of formicine ant species (Fig. 1c) and the gut microbiota structuring  
199 properties of acidic gut compartments in humans (Imhann et al., 2016) and fruit flies  
200 (Overend et al., 2016), it is likely that host filtering (Mazel et al., 2018) through acidification  
201 of crop lumens can explain the recurrent presence of Acetobacteracea in the gut of formicine  
202 ants and the otherwise reduced microbial diversity and abundance of gut associated microbes  
203 (Brown and Wernegreen, 2016, Chua et al., 2018, Ivens et al., 2018). On the other hand, some  
204 formicine gut associated Acetobacteracea show signs of genomic and metabolic adaptations to  
205 their host environment (Brown and Wernegreen, 2019), indicating coevolution and potentially  
206 also mutual benefit, though this has not formally been established (see also Mushegian and  
207 Ebert, 2016). The creation of a challenging gut environment through the ingestion of poison  
208 gland substances that is easier to endure if colonizing microbes are mutualists agrees with the  
209 theoretical concept of screening, as opposed to signalling, as a means of partner choice in  
210 cross-kingdom mutualisms (Archetti et al., 2011a, Archetti et al., 2011b, Biedermann and  
211 Kaltenpoth, 2014, Scheuring and Yu, 2012). Experimental evidence for screening is so far

212 limited in insect-microbe associations (Innocent et al., 2018, Itoh et al., 2019, Ranger et al.,  
213 2018), but the results of our study provide support for the prediction that screening is more  
214 likely to evolve if a host's challenging environment is derived from defence traits against  
215 parasites (Archetti et al., 2011a, Archetti et al., 2011b). Altogether, our study provides  
216 evidence that the well-established cross talk between the immune system and gut associated  
217 microbes in vertebrates and invertebrates (Chu and Mazmanian, 2013, Rakoff-Nahoum et al.,  
218 2004, Slack et al., 2009, Watnick and Jugder, 2020, Xiao et al., 2019) holds for a broader  
219 range of immune defence traits (*sensu* Otti et al., 2014) and might be realized not only  
220 through signalling but also screening.

221

## 222 **Conclusion**

223 Overall our study provides evidence that swallowing of formic acid containing poison gland  
224 secretions acts as a chemical filter for microbial selection and control of gut associated  
225 microbes, protecting formicine ants from food borne bacterial pathogens and structuring gut  
226 associated microbial communities. In ants and other animals that lack acidic poison gland  
227 secretions, acids produced by other exocrine glands (Fernández-Marín et al., 2015, Yek and  
228 Mueller, 2011) or acidic derivatives produced by defensive symbionts (Florez et al., 2015) or  
229 other environmental bacteria (Ratzke and Gore, 2018) might provide functionally similar  
230 roles to acidic poison gland secretions, as indicated in bees (Palmer-Young et al., 2018) and  
231 termites (Inagaki and Matsuura, 2018). Antimicrobials as external immune defence traits (Otti  
232 et al., 2014) may generally not only serve pathogen protection and microbial control but may  
233 also act as microbial filters to manage host associated microbes, be it in food or the  
234 environment, and thus contribute to a host's ecological and evolutionary success. In the case  
235 of social species by alleviating the increased risk of pathogen exposure and transmission

236 associated with group living but allowing the acquisition and transmission of microbial

237 mutualists.

238

## 239 **Methods**

240 **Ant species and maintenance.** Colonies of the carpenter ant *Camponotus floridanus* were  
241 collected in 2001 and 2003 in Florida, USA, housed in Fluon® (Whitford GmbH, Diez,  
242 Germany) coated plastic containers with plaster ground and maintained at a constant  
243 temperature of 25°C with 70% humidity and a 12h/12h light/dark cycle. They were given  
244 water *ad libitum* and were fed three times per week with honey water (1:1 tap water and  
245 commercial quality honey), cockroaches (*Blattella germanica*) and an artificial diet (Bhatkar and  
246 Whitcomb, 1971). For comparison, workers of one other *Camponotus* species (*Camponotus*  
247 *maculatus*), collected close to Kibale Forest, Uganda in 2003 and housed under identical  
248 conditions as *Camponotus floridanus* were used. Additionally, six other formicine ant species,  
249 one *Lasius* and five *Formica* species (*Lasius fuliginosus*, *Formica cinerea*, *Formica*  
250 *cunicularia*, *Formica fuscocinerea*, *Formica pratensis* and *Formica rufibarbis*) were collected  
251 in Bayreuth, Germany in 2012 and 2018 and kept for approximately two weeks prior  
252 experimental use at 20°C, 70% humidity and a 14h/10h light/dark cycle.

253 **Acidification of crop lumen and pH measurements.** To determine whether formicine ants  
254 swallow poison gland secretions after feeding, we tracked changes in pH-levels of the crop  
255 lumen over time. Before use in experimental settings, cohorts of 50-100 ants were taken out  
256 of their natal colony (*C. floridanus*: n = 6 colonies) into small plastic containers lined with  
257 Fluon® and starved for 24-48h. Thereafter, ants were put singly into small petri dishes (Ø 55  
258 mm) with damp filter paper covered bottom, given access to a droplet of 10% honey water  
259 (w/v) for 2h before removing the food source and measuring the pH of the crop lumen in *C.*  
260 *floridanus* after another 2h (group 0+4h: n = 60 workers), after 24h (group 0+24h: n = 59  
261 workers) or 48h (group 0+48h: n = 52 workers). To assess the effect of renewed feeding, a  
262 separate group of *C. floridanus* ants were given access to 10% honey water 48h after the first  
263 feeding for 2h prior to measuring the pH of their crop lumen after another 2h (group 48h+4h:

264 n = 60 workers). To measure the pH, ants were first cold anesthetized on ice, then their gaster  
265 was cut off with a fine dissection scissor directly behind the petiole and leaking crop lumen  
266 (1-3 $\mu$ l) collected with a capillary (5 $\mu$ l Disposable Micro Pipettes, Blaubrand intraMARK,  
267 Brand, Wertheim). The collected crop lumen was then emptied on a pH sensitive paper to  
268 assess the pH (Hartenstein, Unitest pH 1-11). We also measured the pH of 10% honey water  
269 on pH sensitive paper, which gave invariably pH = 5. In addition, we measured the pH in the  
270 crop lumen and at four points in the lumen along the midgut (1<sup>st</sup> measurement directly behind  
271 proventriculus to 4<sup>th</sup> measurement one mm apical from insertion point of malpighian tubules)  
272 of *C. floridanus* workers that were fed 24 h prior to measurements with 10% honey-water. For  
273 these measurements worker guts were dissected as a whole and pH was measured in the crop  
274 (n = 2 workers from two colonies) and along the midgut (all midgut points n = 10, except  
275 point four with n = 9 workers from four different colonies) with a needle-shaped  
276 microelectrode for pH measurements (UNISENSE pH-meter; microelectrode with needle tip  
277 of 20 $\mu$ m diameter). In formicine ants, oral uptake of poison gland secretions into the mouth is  
278 performed via acidopore grooming (Tragust et al., 2013). During this behavior ants bend their  
279 gaster forward between the legs and the head down to meet the acidopore, the opening of the  
280 poison gland, at the gaster tip (Basibuyuk and Quicke, 1999, Farish, 1972). In an additional  
281 experiment we therefore compared the crop lumen pH of *C. floridanus* workers from four  
282 different colonies that were either prevented to reach their acidopore (FA- ants) or could reach  
283 their acidopore freely (FA+ ants). To do this, we again allowed single ants access to 10%  
284 honey water for 2h after a starvation period, before cold anesthetizing them briefly on ice and  
285 immobilizing FA- ants (n = 22 workers) in a pipetting tip, while FA+ ants (n = 23 workers)  
286 remained un-manipulated. After 24h we measured the pH of the crop lumen as before. To  
287 investigate whether crop lumen acidification is widespread among formicine ants, the latter  
288 experiment was repeated for six additional formicine ant species (FA- ants: n = 10 workers  
289 except for *Formica pratensis* with n = 21; FA+ ants: n = 10 workers except for *Formica*

290 *pratensis* with n=20; all ants: n = 1 colony) in the same fashion as described before with the  
291 exception that apart from *Formica pratensis* the crop lumen was collected through the mouth  
292 by gently pressing the ants' gaster. Crop lumen of *Formica pratensis* ants was collected in the  
293 same fashion as crop lumen of *C. floridanus* ants.

294 **Bacterial strains and culture.** As model entomopathogenic bacterium *Serratia marcescens*  
295 DSM12481 (DSMZ Braunschweig, Germany) was used. This bacterium is pathogenic in a  
296 range of insects (Grimont and Grimont, 2006) and has been detected in formicine ants, i.e.  
297 *Anoplolepis gracilipes* (Cooling et al., 2018) and *Camponotus floridanus* (Ratzka et al.,  
298 2011). While often non-lethal within the digestive tract, *S. marcescens* can cross the insect gut  
299 wall (Mirabito and Rosengaus, 2016, Nehme et al., 2007) and is highly virulent upon entry  
300 into the hemocoel (Flyg et al., 1980), not least due to the production of bacterial toxins  
301 (Hertle, 2005). As a model bacterial gut-associate of ants *Asaia* sp. strain SF2.1 (Favia et al.,  
302 2007), was used. *Asaia* sp. belongs to the family Acetobacteraceae, members of which often  
303 thrive in sugar-rich environments (Mamlouk and Gullo, 2013), such as honey-dew that ants  
304 like *C. floridanus* predominantly feed on. *Asaia* sp. is capable of cross-colonizing insects of  
305 phylogenetically distant genera and orders (Crotti et al., 2009, Favia et al., 2007) and can be a  
306 component of the gut associated microbial community of formicine ants (Chua et al., 2018,  
307 Kautz et al., 2013a, Kautz et al., 2013b). In addition to *S. marcescens* and *Asaia* sp.,  
308 *Escherichia coli* DSM6897 (DSMZ Braunschweig, Germany) was used as a model bacterium  
309 that is not a gut-associate of insects. *E. coli* bacteria are a principal constituent of mammalian  
310 gut associated microbial communities but are commonly also found in the environment  
311 (Blount, 2015).

312 Bacterial stocks of *S. marcescens*, *Asaia* sp., and *E. coli* were kept in 25% glycerol at -80°C  
313 until use. For use, bacteria were plated on agar plates (LB-medium: 10g Tryptone, 5g Yeast  
314 extract, 20g Agar in 1L MilliQ-water, and GLY-medium: 25g Glycerol, 10g Yeast extract, 20g

315 Agar in 1L MilliQ-water with pH adjusted to 5.0, for *S. marcescens*/*E. coli* and *Asaia* sp.  
316 respectively), single colony forming units (CFUs) were picked after 24h (*S. marcescens*/*E.*  
317 *coli*) or 48h (*Asaia* sp.) of growth at 30°C and transferred to 5ml liquid medium (LB-medium  
318 and GLY-medium minus agar for *S. marcescens*/*E. coli* and *Asaia* sp. respectively) for an  
319 overnight culture (24h) at 30°C. The overnight culture was then pelleted by centrifugation at  
320 3000g, the medium discarded and resolved in 10% (w/v) honey water to the respective  
321 working concentration for the experiments. The concentration of a typical overnight culture  
322 was determined for *S. marcescens* and *Asaia* sp. by plating part of the overnight culture on  
323 agar plates and counting CFUs after 24h or 48h of growth at 30°C, for *S. marcescens* and  
324 *Asaia* sp. respectively. This yielded a concentration of  $1.865 * 10^9 \pm 5.63 * 10^7$  (mean  $\pm$  sd)  
325 bacteria per ml for *S. marcescens* and  $5.13 * 10^8 \pm 8.48 * 10^6$  (mean  $\pm$  sd) bacteria for *Asaia*  
326 sp.

327 **Survival experiments.** In a first survival experiment we tested whether the ability to perform  
328 acidopore grooming within the first 24h after ingestion of pathogen contaminated food  
329 provides a survival benefit for individual *C. floridanus* ants. Ants from eight colonies were  
330 starved as described before and single workers in small petri dishes were then either given  
331 access to 5µl of *S. marcescens* contaminated 10% honey water ( $9.33 * 10^9$  bacteria/ml;  
332 *Serratia*+ ants: n = 127) or uncontaminated 10% honey water (*Serratia*- ants: n = 135) for 2  
333 min. Thereafter, all ants were cold anaesthetized and approximately half of the *Serratia*+ and  
334 the *Serratia*- ants (n = 65 and n = 69, respectively) immobilized in a pipetting tip, thus  
335 preventing acidopore grooming (FA- ants: n = 134) while the other half remained fully mobile  
336 (FA+ ants: n = 128). After 24h, FA- ants were freed from the pipetting tip to minimize stress.  
337 Mortality of the ants was monitored over 5 days (120h) every 12h.

338 In an additional survival experiment, we investigated whether the acidification of the crop  
339 lumen has the potential to limit oral disease transmission during trophallactic food transfer.

340 To this end *C. floridanus* ants from seven colonies were again starved, divided randomly in  
341 two groups (donor and receiver ants, each  $n = 322$ ) and their gaster marked with one of two  
342 colours (Edding 751). Additionally, to prevent uptake of poison gland secretion, the acidopore  
343 opening of all receiver ants (receiver FA-) and half of the donor ants (donor FA-) was sealed  
344 with superglue, while the other half of the donor ants were sham treated (donor FA+) with a  
345 droplet of superglue on their gaster (Tragust et al., 2013). We then paired these ants into two  
346 different donor-receiver ant pairs. Pairs with both donor and receiver ants having their  
347 acidopore sealed (donor FA- | receiver FA-) and pairs with only receiver ants having their  
348 acidopore sealed (donor FA+ | receiver FA-). Six hours after pairing, donor ants from both  
349 pairs were isolated and given access to 5 $\mu$ l of *S. marcescens* contaminated 10% honey water  
350 ( $1.865 \times 10^9$  bacteria/ml) for 12h. Thereafter donor ants were again paired with the respective  
351 receiver ants for 12 h and all pairs filmed for the first 30min. (Logitech webcam c910). These  
352 videos were then analyzed for the duration of trophallaxis events donor-receiver ant pairs  
353 engaged in. After this first feeding round, donor ants were fed in the same fashion, i.e.  
354 isolation for 12h with access to *S. marcescens* contaminated 10% honey water, every 48h,  
355 while they were maintained with the respective receiver ants for the rest of the time. This  
356 experimental design ensured that receiver ants were fed only through the respective donor  
357 ants with pathogen contaminated food. Survival of both, donor and receiver ants, was  
358 monitored daily for a total of 12 days.

359 **Bacterial growth assays.** We tested the ability of *S. marcescens* and *Asaia* sp. to withstand  
360 acidic environments in the crop *in vitro* and *in vivo*, as well as their ability and the ability of  
361 *E. coli* to pass from the crop to the midgut *in vivo*. In ants, gut morphological structures, i.e.  
362 the infrabuccal pocket, an invagination of the hypopharynx in the oral cavity (Eisner and  
363 Happ, 1962), and the proventriculus, a valve that mechanically restricts passage of fluids from  
364 the crop to the midgut (Eisner and Wilson, 1952), consecutively filter solid particles down to



365 2µm (Lanan et al., 2016) which would allow *S. marcescens* (Ø: 0.5-0.8µm, length: 0.9-2µm,  
366 Grimont and Grimont, 2006), *Asaia* sp. (Ø: 0.4-1µm, length: 0.8-2.5µm, (Komagata et al.,  
367 2014), and *E. coli* (length: 1µm, width: 0.35µm, Blount, 2015) to pass. For the *in vitro* tests  
368 we incubated a diluted bacterial overnight culture ( $10^5$  and  $10^4$  CFU/ml for *S. marcescens* and  
369 *Asaia* sp., respectively) in 10% honey water (pH = 5) and in 10% honey water acidified with  
370 commercial formic acid to a pH of 4, 3 or 2 for 2h at room temperature (*S. marcescens*: n = 15  
371 for all pH-levels, except pH = 4 with n = 13; *Asaia* sp.: n = 10). Then we plated 100µl of the  
372 bacterial solutions on agar-medium (LB-medium and GLY-medium for *S. marcescens* and  
373 *Asaia* sp., respectively) and incubated them at 30°C for 24h (*S. marcescens*) or 48h (*Asaia*  
374 sp.) before counting the number of formed CFUs. For the *in vivo* tests *C. floridanus* ants from  
375 five (*Asaia* sp.), four (*E. coli*) or from six colonies (*S. marcescens*) were starved as before and  
376 then individually given access to 5µl of bacteria contaminated 10% honey water (*Asaia* sp.  
377 and *E. coli*:  $1 * 10^7$  CFU/ml, *S. marcescens*:  $1 * 10^6$  CFU/ml) for 2 min. To assess the number  
378 of CFUs in the digestive tract, i.e. the crop and the midgut, ants were dissected either directly  
379 after feeding (0h; *S. marcescens*: n = 60 workers; *Asaia* sp. and *E. coli*: n = 15 each), 0.5h (*S.*  
380 *marcescens*: n = 60; *Asaia* sp. and *E. coli*: n = 15 each), 4h (*S. marcescens*: n = 60; *Asaia* sp.  
381 and *E. coli*: n = 15 each), 24h (*S. marcescens*: n = 53; *Asaia* sp. and *E. coli*: n = 15 each) or  
382 48h (*S. marcescens*: n = 19; *Asaia* sp. and *E. coli*: n = 15 each) after feeding. These timepoints  
383 were chosen according to literature describing peak passage of food from the crop to the  
384 midgut within 20h after food consumption in ants (Gösswald and Kloft, 1960, Howard and  
385 Tschinkel, 1981). For dissection, ants were cold anesthetized, the gaster opened and the whole  
386 gut detached. The crop and the midgut were then separated from the digestive tract, placed in  
387 a reaction tube, mechanically crushed with a sterile pestle and dissolved in 100µl (*Asaia* sp.  
388 and *E. coli*) or 150µl (*S. marcescens*) phosphate buffered saline (PBS-buffer: 8.74g NaCl,  
389 1.78g Na<sub>2</sub>HPO<sub>4</sub>·2H<sub>2</sub>O in 1L MilliQ-water adjusted to a pH of 6.5). The resulting solutions  
390 were then thoroughly mixed, 100µl streaked on agar-medium (LB-medium and GLY-medium

391 for *S. marcescens*/*E. coli* and *Asaia* sp., respectively) and incubated at 30°C for 24h (*S.*  
392 *marcescens* and *E. coli*) or 48h (*Asaia* sp.), before counting the number of formed CFUs. No  
393 other bacteria (e.g. resident microbes) were growing on the agar plates which agrees with the  
394 very low number of cultivable resident bacteria present in the midgut of *C. floridanus* (Stoll  
395 and Gross, unpublished results).

396 **Statistical analyses.** All statistical analyses were performed with the R statistical  
397 programming language (version 3.6.1, R Core Team, 2019). All (zero-inflated) General(ized)  
398 linear and mixed models and Cox mixed-effects models were compared to null (intercept  
399 only) or reduced models (for those with multiple predictors) using Likelihood Ratio (LR) tests  
400 to assess the significance of predictors. Pairwise comparisons between factor levels of a  
401 significant predictor were performed using pairwise post-hoc tests adjusting the family-wise  
402 error rate according to the method of Westfall (package “multcomp”, Bretz et al., 2011). We  
403 checked necessary model assumptions of (zero-inflated) General(ized) linear and mixed  
404 models using model diagnostic tests and plots implemented in the package “DHARMA”  
405 (Hartig, 2019). Acidification of the crop lumen (log transformed pH to normalize data) and  
406 midgut lumen in *C. floridanus* was analyzed using linear mixed models (LMM, package  
407 ”lme4”, Bates et al., 2015) including time since feeding (four levels: 0+4h, 0+24h, 0+48h,  
408 48h+4h; Fig. 1a), ant manipulation (two levels: FA+ and FA-, i.e. ants with and without  
409 acidopore access; Fig. 1b) or digestive tract part (four levels: crop, midgut position 1, midgut  
410 position 2, midgut position 3, midgut position 4; Fig.1 – supplementary figure 1) as predictors  
411 and natal colony as a random effect. Due to non-normality and heteroscedasticity, the  
412 acidification of crop lumen in the seven formicine ant species other than *C. floridanus* (Fig.  
413 1c) was analysed using per species Wilcoxon Rank Sum tests with ant manipulation (FA+ and  
414 FA-) as predictor. The frequency of acidopore grooming in *C. floridanus* upon feeding  
415 different types of fluids was analyzed using Generalized linear mixed models (GLMM,

416 package "lme4", Bates et al., 2015) with negative binomial errors and type of fluid (three  
417 levels: unfed, water-fed or 10% honey water fed) as predictor and natal colony as random  
418 effect (Fig. 1 – supplementary figure 2).

419 Survival data were analysed with Cox mixed effects models (COXME, package "coxme",  
420 Therneau, 2019). For the survival of individual ants (Fig. 2a), ant treatment (four levels:  
421 *Serratia*- | FA-, *Serratia*- | FA+, *Serratia*+ | FA-, *Serratia*+ | FA+) was added as a predictor  
422 and the three "blocks", in which the experiment was run and the colony, ants originated from,  
423 were included as two random intercept effects. For the survival of donor-receiver ant pairs  
424 (Fig. 2b), ant treatment (four levels: donor FA+, donor FA-, receiver FA+, receiver FA-) was  
425 included as a predictor and the three "blocks", in which the experiment was run, the colony,  
426 ants originated from, and petri dish, in which donor and receiver ants were paired, were  
427 included as three random intercept effects. Survival of receiver ants was right censored if the  
428 corresponding donor ant died at the next feeding bout (right censoring of both donor and  
429 receiver ants in one pair upon death of one of the ants yielded statistically the same result:  
430 COXME, overall LR  $\chi^2 = 60.202$ ,  $df = 3$ ,  $P < 0.001$ ; post-hoc comparisons: receiver FA- vs  
431 donor FA-:  $P = 0.388$ , all other comparisons:  $P < 0.001$ ). The duration of trophallaxis events  
432 (square-root transformed to normalize data) between donor-receiver ant pairs was analysed  
433 using a linear mixed model with ant pair type (two levels: donor FA+ | receiver FA- and  
434 donor FA- | receiver FA-) as predictor and the three "blocks", in which the experiment was  
435 run and the colony ants originated from as random effect (Fig. 2 - supplementary figure 1).

436 Bacterial growth *in vitro* was analysed separately for *Asaia sp.* and *S. marcescens* using  
437 Generalized linear models (GLM) with negative binomial errors and pH as predictor,  
438 excluding pH levels with zero bacterial growth due to complete data separation (Fig. 3 -  
439 supplementary figure 1). Relative values shown in Fig. 3 -supplementary figure 1 were  
440 calculated by dividing single CFU numbers through the mean of CFU numbers at pH 5.

441 Bacterial growth *in vivo* within the digestive tract of *C. floridanus* over time was analysed  
442 separately for the crop and midgut for both *Asaia sp.* and *S. marcescens* (Fig. 3) and for *E.*  
443 *coli* (Fig. 3 – figure supplement 2). Zero-inflated generalized linear mixed models with  
444 negative binomial errors (package “glmmTMB”, Brooks et al., 2017) were used to model  
445 CFU number, with time after feeding as fixed predictor and ant colony as random effect,  
446 except for *E. coli* growth in the crop where colony was included as fixed factor as the model  
447 did not converge with colony as a random factor. Time points with zero bacterial growth were  
448 again excluded from the model. Relative values shown in Fig. 3 and Fig. 3 – supplementary  
449 figure 2 and reported in the main text were calculated by dividing single CFU numbers  
450 through the mean of CFU numbers at timepoint 0h in the crop.

451

452 **Acknowledgements**

453 We would like to thank Robert Paxton for English grammar and style check of a pre-  
454 submission version of the manuscript, Franziska Vogel and Marvin Gilliar for part of the data  
455 collection, Elena Crotti and Daniele Daffonchio for providing the *Asaia* strain and Martin  
456 Kaltenpoth for access to the pH microelectrode.

457

458 **Author contributions**

459 S.T. and H.F. conceived the experiments. S.T. and M.A.M. performed the survival assays and  
460 the behavioral observations. C. H., C. T., R. B. and J. H. measured crop lumen acidification.  
461 H. F. measured pH in the midgut. M. H. and C. H. performed *in vivo* bacterial growth  
462 measurements. C. T. performed the *in vitro* bacterial growth measurements. S.T. analyzed the  
463 data and prepared the manuscript. S.T., C.H., J.H., R.B., C.T., M.H., M.A.M., R.G. and H.F.  
464 edited the manuscript.

465

466 **Competing interests**

467 The authors declare no competing interests.

468

469 **Data and code availability**

470 The authors declare that all data supporting the findings of this study and that all code  
471 required to reproduce the analyses and figures of this study are available within the article and  
472 its supplementary information and will be made publicly available at a digital repository upon  
473 acceptance.

474 **References**

- 475 ALEXANDER, R. D. 1974. The evolution of social behavior. *Annual Review of Ecology and*  
476 *Systematics*, 5, 325-383.
- 477 ANDERSON, K. E., RUSSELL, J. A., MOREAU, C. S., KAUTZ, S., SULLAM, K. E., HU,  
478 Y., BASINGER, U., MOTT, B. M., BUCK, N. & WHEELER, D. E. 2012. Highly  
479 similar microbial communities are shared among related and trophically similar ant  
480 species. *Molecular Ecology*, 21, 2282-2296.
- 481 ARCHETTI, M., SCHEURING, I., HOFFMAN, M., FREDERICKSON, M. E., PIERCE, N.  
482 E. & YU, D. W. 2011a. Economic game theory for mutualism and cooperation.  
483 *Ecology Letters*, 14, 1300-12.
- 484 ARCHETTI, M., UBEDA, F., FUDENBERG, D., GREEN, J., PIERCE, N. E. & YU, D. W.  
485 2011b. Let the right one in: a microeconomic approach to partner choice in  
486 mutualisms. *American Naturalist*, 177, 75-85.
- 487 BASIBUYUK, H. H. & QUICKE, D. L. J. 1999. Grooming behaviours in the Hymenoptera  
488 (Insecta): Potential phylogenetic significance. *Zoological Journal of the Linnean*  
489 *Society*, 125, 349-382.
- 490 BATES, D., MAECHLER, M., BOLKER, B. & WALKER, S. 2015. Fitting Linear mixed-  
491 effects models using lme4. *Journal of Statistical Software*, 67, 1-48.
- 492 BEASLEY, D. E., KOLTZ, A. M., LAMBERT, J. E., FIERER, N. & DUNN, R. R. 2015. The  
493 evolution of stomach acidity and its relevance to the human microbiome. *PloS One*,  
494 10, e0134116.
- 495 BHATKAR, A. & WHITCOMB, W. H. 1971. Artificial diet for rearing various species of  
496 ants. *Florida Entomologist*, 53, 229-232.
- 497 BIEDERMANN, P. H. & KALTENPOTH, M. 2014. New synthesis: the chemistry of partner  
498 choice in insect-microbe mutualisms. *Journal of Chemical Ecology*, 40, 99.
- 499 BLOUNT, Z. D. 2015. The unexhausted potential of *E. coli*. *eLife*, 4.
- 500 BLUM, J. E., FISCHER, C. N., MILES, J. & HANDELSMAN, J. 2013. Frequent  
501 replenishment sustains the beneficial microbiome of *Drosophila melanogaster*. *mBio*,  
502 4, e00860-13.
- 503 BOOMSMA, J. J., SCHMID-HEMPEL, P. & HUGHES, W. O. H. 2005. Life histories and  
504 parasite pressure across the major groups of social insects. In: FELLOWES, M. H. G.  
505 & ROLFF, J. (eds.) *Insect Evolutionary Ecology*. Oxon, UK: CABI.
- 506 BRETZ, F., HOTHORN, T. & WESTFALL, P. 2011. *Multiple Comparisons using R*, Boca  
507 Raton, FL, CRC Press.
- 508 BRODERICK, N. A. & LEMAITRE, B. 2012. Gut-associated microbes of *Drosophila*  
509 *melanogaster*. *Gut Microbes*, 3, 307-21.
- 510 BROOKS, M. E., KRISTENSEN, K., VAN BENTHEM, K. J., MAGNUSSON, A., BERG,  
511 C. W., NIELSEN, A., SKAUG, H. J., MAECHLER, M. & BOLKER, B. M. 2017.  
512 glmmTMB balances speed and flexibility among packages for zero-inflated  
513 generalized linear mixed modeling. *The R Journal*, 9, 378-400.
- 514 BROWN, B. P. & WERNEGREEN, J. J. 2016. Deep divergence and rapid evolutionary rates  
515 in gut-associated Acetobacteraceae of ants. *BMC Microbiology*, 16.
- 516 BROWN, B. P. & WERNEGREEN, J. J. 2019. Genomic erosion and extensive horizontal  
517 gene transfer in gut-associated Acetobacteraceae. *BMC Genomics*, 20.
- 518 BRUNE, A. & DIETRICH, C. 2015. The gut microbiota of termites: Digesting the diversity  
519 in the light of ecology and evolution. *Annual Review of Microbiology*, 69, 145-166.
- 520 BRÜTSCH, T., JAFFUEL, G., VALLAT, A., TURLINGS, T. C. & CHAPUISAT, M. 2017.  
521 Wood ants produce a potent antimicrobial agent by applying formic acid on tree-  
522 collected resin. *Ecology and Evolution*, 7, 2249-2254.

- 523 BURKEPILE, D. E., PARKER, J. D., WOODSON, C. B., MILLS, H. J., KUBANEK, J.,  
524 SOBECKY, P. A. & HAY, M. E. 2006. Chemically mediated competition between  
525 microbes and animals: Microbes as consumers in food webs. *Ecology*, 87, 2821-2831.
- 526 CARDOZA, Y. J., KLEPZIG, K. D. & RAFFA, K. F. 2006. Bacteria in oral secretions of an  
527 endophytic insect inhibit antagonistic fungi. *Ecological Entomology*, 31, 636-645.
- 528 CASEWELL, N. R., WUSTER, W., VONK, F. J., HARRISON, R. A. & FRY, B. G. 2013.  
529 Complex cocktails: The evolutionary novelty of venoms. *Trends in Ecology &*  
530 *Evolution*, 28, 219-229.
- 531 CHAPMAN, R. F. 2013. *The insects: Structure and function.*, Cambridge, United Kingdom,  
532 Cambridge University Press.
- 533 CHU, H. & MAZMANIAN, S. K. 2013. Innate immune recognition of the microbiota  
534 promotes host-microbial symbiosis. *Nature Immunology*, 14, 668-75.
- 535 CHUA, K. O., SONG, S. L., YONG, H. S., SEE-TOO, W. S., YIN, W. F. & CHAN, K. G.  
536 2018. Microbial community composition reveals spatial variation and distinctive core  
537 microbiome of the weaver ant *Oecophylla smaragdina* in Malaysia. *Scientific Reports*,  
538 8, 10777.
- 539 COOLING, M. D., HOFFMANN, B. D., GRUBER, M. A. M. & LESTER, P. J. 2018.  
540 Indirect evidence of pathogen-associated altered oocyte production in queens of the  
541 invasive yellow crazy ant, *Anoplolepis gracilipes*, in Arnhem Land, Australia. *Bulletin*  
542 *of Entomological Research*, 108, 451-460.
- 543 CREMER, S., ARMITAGE, S. A. & SCHMID-HEMPEL, P. 2007. Social immunity. *Current*  
544 *Biology*, 17, R693-702.
- 545 CROTTI, E., DAMIANI, C., PAJORO, M., GONELLA, E., RIZZI, A., RICCI, I., NEGRI, I.,  
546 SCUPPA, P., ROSSI, P., BALLARINI, P., RADDADI, N., MARZORATI, M.,  
547 SACCHI, L., CLEMENTI, E., GENCHI, M., MANDRIOLI, M., BANDI, C., FAVIA,  
548 G., ALMA, A. & DAFFONCHIO, D. 2009. *Asaia*, a versatile acetic acid bacterial  
549 symbiont, capable of cross-colonizing insects of phylogenetically distant genera and  
550 orders. *Environmental Microbiology*, 11, 3252-3264.
- 551 CURRIE, C. R., SCOTT, J. A., SUMMERBELL, R. C. & MALLOCH, D. 1999. Fungus-  
552 growing ants use antibiotic-producing bacteria to control garden parasites. *Nature*,  
553 398, 701-704.
- 554 DAVID, L. A., MAURICE, C. F., CARMODY, R. N., GOOTENBERG, D. B., BUTTON, J.  
555 E., WOLFE, B. E., LING, A. V., DEVLIN, A. S., VARMA, Y., FISCHBACH, M. A.,  
556 BIDDINGER, S. B., DUTTON, R. J. & TURNBAUGH, P. J. 2014. Diet rapidly and  
557 reproducibly alters the human gut microbiome. *Nature*, 505, 559-63.
- 558 DEGNAN, P. H., LAZARUS, A. B., BROCK, C. D. & WERNEGREEN, J. J. 2004. Host-  
559 symbiont stability and fast evolutionary rates in an ant-bacterium association:  
560 cospeciation of *Camponotus* species and their endosymbionts, *candidatus*  
561 *Blochmannia*. *Systematic Biology*, 53, 95-110.
- 562 DEMAIN, A. L. & FANG, A. 2000. The Natural Functions of Secondary Metabolites. *In:*  
563 FIECHTER, A. (ed.) *History of Modern Biotechnology I*. Berlin, Heidelberg: Springer  
564 Berlin Heidelberg.
- 565 EISNER, T. & HAPP, G. M. 1962. The infrabuccal pocket of a formicine ant: a social  
566 filtration device. *Psyche*, 69, 107-116.
- 567 EISNER, T. & WILSON, E. O. 1952. The morphology of the porventriculus of a formicine  
568 ant. *Psyche*, 59, 47-60.
- 569 ENGEL, P. & MORAN, N. A. 2013. The gut microbiota of insects - diversity in structure and  
570 function. *FEMS Microbiology Reviews*, 37, 699-735.
- 571 FARISH, D. J. 1972. The evolutionary implications of qualitative variation in the grooming  
572 behaviour of the Hymenoptera (Insecta). *Animal Behaviour*, 20, 662-76.

- 573 FAVIA, G., RICCI, I., DAMIANI, C., RADDADI, N., CROTTI, E., MARZORATI, M.,  
574 RIZZI, A., URSO, R., BRUSETTI, L., BORIN, S., MORA, D., SCUPPA, P.,  
575 PASQUALINI, L., CLEMENTI, E., GENCHI, M., CORONA, S., NEGRI, I.,  
576 GRANDI, G., ALMA, A., KRAMER, L., ESPOSITO, F., BANDI, C., SACCHI, L. &  
577 DAFFONCHIO, D. 2007. Bacteria of the genus *Asaia* stably associate with *Anopheles*  
578 *stephensi*, an Asian malarial mosquito vector. *Proceedings of the National Academy of*  
579 *Sciences of the United States of America*, 104, 9047-9051.
- 580 FELDHAAR, H., STRAKA, J., KRISCHKE, M., BERTHOLD, K., STOLL, S., MUELLER,  
581 M. J. & GROSS, R. 2007. Nutritional upgrading for omnivorous carpenter ants by the  
582 endosymbiont *Blochmannia*. *BMC Biology*, 5, 48.
- 583 FERNÁNDEZ-MARÍN, H., NASH, D. R., HIGGINBOTHAM, S., ESTRADA, C., VAN  
584 ZWEDEN, J. S., D'ETTORRE, P., WCISLO, W. T. & BOOMSMA, J. J. 2015.  
585 Functional role of phenylacetic acid from metapleural gland secretions in controlling  
586 fungal pathogens in evolutionarily derived leaf-cutting ants. *Proceedings of the Royal*  
587 *Society of London. Series B, Biological Sciences*, 282, 20150212.
- 588 FLOREZ, L. V., BIEDERMANN, P. H. W., ENGL, T. & KALTENPOTH, M. 2015.  
589 Defensive symbioses of animals with prokaryotic and eukaryotic microorganisms.  
590 *Natural Product Reports*, 32, 904-936.
- 591 FLYG, C., KENNE, K. & BOMAN, H. G. 1980. Insect pathogenic properties of *Serratia*  
592 *marcescens*: Phage-resistant mutants with a decreased resistance to *Cecropia*  
593 immunity and a decreased virulence to *Drosophila*. *Journal of General Microbiology*,  
594 120, 173-181.
- 595 FOSTER, K. R., SCHLUTER, J., COYTE, K. Z. & RAKOFF-NAHOUM, S. 2017. The  
596 evolution of the host microbiome as an ecosystem on a leash. *Nature*, 548, 43-51.
- 597 GERNAT, T., RAO, V. D., MIDDENDORF, M., DANKOWICZ, H., GOLDENFELD, N. &  
598 ROBINSON, G. E. 2018. Automated monitoring of behavior reveals bursty interaction  
599 patterns and rapid spreading dynamics in honeybee social networks. *Proceedings of*  
600 *the National Academy of Sciences of the United States of America*, 115, 1433-1438.
- 601 GIANNELLA, R. A., ZAMCHECK, N. & BROITMAN, S. A. 1972. Gastric-acid barrier to  
602 ingested microorganisms in man - studies *in-vivo* and *in-vitro*. *Gut*, 13, 251-256.
- 603 GÖSSWALD, K. & KLOFT, W. 1960. Untersuchungen mit radioaktiven Isotopen an  
604 Waldameisen. *Entomophaga*, 5, 33-41.
- 605 GREENWALD, E. E., BALTIANSKY, L. & FEINERMAN, O. 2018. Individual crop loads  
606 provide local control for collective food intake in ant colonies. *eLife*, 7, e31730.
- 607 GRIMONT, F. & GRIMONT, P. A. D. 2006. The genus *Serratia*. In: DWORKIN, M.,  
608 FALKOW, S., ROSENBERG, E., SCHLEIFER, K.-H. & STACKEBRANDT, E.  
609 (eds.) *The Prokaryotes: Volume 6: Proteobacteria: Gamma Subclass*. New York, NY:  
610 Springer New York.
- 611 HAMILTON, C., LEJEUNE, B. T. & ROSENGAUS, R. B. 2011. Trophallaxis and  
612 prophylaxis: social immunity in the carpenter ant *Camponotus pennsylvanicus*.  
613 *Biology Letters*, 7, 89-92.
- 614 HAMMER, T. J., JANZEN, D. H., HALLWACHS, W., JAFFE, S. P. & FIERER, N. 2017.  
615 Caterpillars lack a resident gut microbiome. *Proc Natl Acad Sci U S A*, 114, 9641-  
616 9646.
- 617 HARTIG, F. 2019. DHARMA: Residual diagnostics for hierarchical (multi-level/mixed)  
618 regression models. R package version 0.2.4. [https://CRAN.R-](https://CRAN.R-project.org/package=DHARMA)  
619 [project.org/package=DHARMA](https://CRAN.R-project.org/package=DHARMA).
- 620 HE, H., CHEN, Y. Y., ZHANG, Y. L. & WEI, C. 2011. Bacteria associated with gut lumen of  
621 *Camponotus japonicus* Mayr. *Environmental Entomology*, 40, 1405-1409.
- 622 HERTLE, R. 2005. The family of *Serratia* type pore forming toxins. *Current Protein and*  
623 *Peptide Science*, 6, 313-325.



- 624 HERZNER, G., SCHLECHT, A., DOLLHOFER, V., PARZEFALL, C., HARRAR, K.,  
625 KREUZER, A., PILSL, L. & RUTHER, J. 2013. Larvae of the parasitoid wasp  
626 *Ampulex compressa* sanitize their host, the American cockroach, with a blend of  
627 antimicrobials. *Proceedings of the National Academy of Sciences of the United States*  
628 *of America*, 110, 1369-1374.
- 629 HERZNER, G. & STROHM, E. 2007. Fighting fungi with physics: food wrapping by a  
630 solitary wasp prevents water condensation. *Current Biology*, 17, R46-7.
- 631 HOLTOF, M., LENAERTS, C., CULLEN, D. & VANDEN BROECK, J. 2019. Extracellular  
632 nutrient digestion and absorption in the insect gut. *Cell and Tissue Research*, 377,  
633 397-414.
- 634 HOWARD, D. F. & TSCHINKEL, W. R. 1981. The flow of food in colonies of the fire ant,  
635 *Solenopsis invicta*: a multifactorial study. *Physiological Entomology*, 6, 297-306.
- 636 HOWDEN, C. W. & HUNT, R. H. 1987. Relationship between gastric-secretion and  
637 infection. *Gut*, 28, 96-107.
- 638 IMHANN, F., BONDER, M. J., VICH VILA, A., FU, J., MUJAGIC, Z., VORK, L.,  
639 TIGCHELAAR, E. F., JANKIPERSADSING, S. A., CENIT, M. C., HARMSSEN, H.  
640 J., DIJKSTRA, G., FRANKE, L., XAVIER, R. J., JONKERS, D., WIJMENGA, C.,  
641 WEERSMA, R. K. & ZHERNAKOVA, A. 2016. Proton pump inhibitors affect the  
642 gut microbiome. *Gut*, 65, 740-8.
- 643 INAGAKI, T. & MATSUURA, K. 2018. Extended mutualism between termites and gut  
644 microbes: Nutritional symbionts contribute to nest hygiene. *The Science of Nature*,  
645 105, 52.
- 646 INNOCENT, T., HOLMES, N., AL BASSAM, M., SCHIØTT, M., SCHEURING, I.,  
647 WILKINSON, B., HUTCHINGS, M. I., BOOMSMA, J. J. & YU, D. W. 2018.  
648 Experimental demonstration that screening can enable the environmental recruitment  
649 of a defensive microbiome. *bioRxiv*.
- 650 ITOH, H., JANG, S., TAKESHITA, K., OHBAYASHI, T., OHNISHI, N., MENG, X. Y.,  
651 MITANI, Y. & KIKUCHI, Y. 2019. Host-symbiont specificity determined by  
652 microbe-microbe competition in an insect gut. *Proceedings of the National Academy*  
653 *of Sciences of the United States of America*, 116, 22673-22682.
- 654 IVENS, A. B. F., GADAU, A., KIERS, E. T. & KRONAUER, D. J. C. 2018. Can social  
655 partnerships influence the microbiome? Insights from ant farmers and their  
656 trophobiont mutualists. *Molecular Ecology*, 27, 1898-1914.
- 657 JANZEN, D. H. 1977. Why fruits rot, seeds mold, and meat spoils. *American Naturalist*, 111,  
658 691-713.
- 659 JOOP, G., ROTH, O., SCHMID-HEMPEL, P. & KURTZ, J. 2014. Experimental evolution of  
660 external immune defences in the red flour beetle. *Journal of Evolutionary Biology*, 27,  
661 1562-1571.
- 662 KAPPELER, P. M., CREMER, S. & NUNN, C. L. 2015. Sociality and health: impacts of  
663 sociality on disease susceptibility and transmission in animal and human societies.  
664 *Philosophical Transactions of the Royal Society of London. Series B, Biological*  
665 *Sciences*, 370, 20140116.
- 666 KAUTZ, S., RUBIN, B. E. R. & MOREAU, C. S. 2013a. Bacterial infections across the ants:  
667 Frequency and prevalence of *Wolbachia*, *Spiroplasma*, and *Asaia*. *Psyche*, e936341.
- 668 KAUTZ, S., RUBIN, B. E. R., RUSSELL, J. A. & MOREAU, C. S. 2013b. Surveying the  
669 microbiome of ants: Comparing 454 pyrosequencing with traditional methods to  
670 uncover bacterial diversity. *Applied and Environmental Microbiology*, 79, 525-534.
- 671 KOELZ, H. R. 1992. Gastric-acid in vertebrates. *Scandinavian Journal of Gastroenterology*,  
672 27, 2-6.
- 673 KOMAGATA, K., IINO, T. & YAMADA, Y. 2014. The family Acetobacteraceae. In:  
674 ROSENBERG, E., DELONG, E. F., LORY, S., STACKEBRANDT, E. &

- 675 THOMPSON, F. (eds.) *The Prokaryotes: Alphaproteobacteria and*  
676 *Betaproteobacteria*. Berlin, Heidelberg: Springer Berlin Heidelberg.
- 677 KWONG, W. K., MEDINA, L. A., KOCH, H., SING, K. W., SOH, E. J. Y., ASCHER, J. S.,  
678 JAFFE, R. & MORAN, N. A. 2017. Dynamic microbiome evolution in social bees.  
679 *Science Advances*, 3.
- 680 LANAN, M. C., RODRIGUES, P. A. P., AGELLON, A., JANSMA, P. & WHEELER, D. E.  
681 2016. A bacterial filter protects and structures the gut microbiome of an insect. *The*  
682 *ISME Journal*, 10, 1866-1876.
- 683 LEBOEUF, A. C., WARIDEL, P., BRENT, C. S., GONCALVES, A. N., MENIN, L.,  
684 ORTIZ, D., RIBA-GROGNUM, O., KOTO, A., SOARES, Z. G., PRIVMAN, E.,  
685 MISKA, E. A., BENTON, R. & KELLER, L. 2016. Oral transfer of chemical cues,  
686 growth proteins and hormones in social insects. *eLife*, 5, e20375.
- 687 MAMLOUK, D. & GULLO, M. 2013. Acetic acid bacteria: Physiology and carbon sources  
688 oxidation. *Indian Journal of Microbiology*, 53, 377-384.
- 689 MARTINSEN, T. C., BERGH, K. & WALDUM, H. L. 2005. Gastric juice: A barrier against  
690 infectious diseases. *Basic & Clinical Pharmacology & Toxicology*, 96, 94-102.
- 691 MAZEL, F., DAVIS, K. M., LOUDON, A., KWONG, W. K., GROUSSIN, M. & PARFREY,  
692 L. W. 2018. Is host filtering the main driver of phyllosymbiosis across the tree of life?  
693 *mSystems*, 3.
- 694 MCFALL-NGAI, M., HADFIELD, M. G., BOSCH, T. C., CAREY, H. V., DOMAZET-  
695 LOSEO, T., DOUGLAS, A. E., DUBILIER, N., EBERL, G., FUKAMI, T., GILBERT,  
696 S. F., HENTSCHEL, U., KING, N., KJELLEBERG, S., KNOLL, A. H., KREMER,  
697 N., MAZMANIAN, S. K., METCALF, J. L., NEALSON, K., PIERCE, N. E.,  
698 RAWLS, J. F., REID, A., RUBY, E. G., RUMPHO, M., SANDERS, J. G., TAUTZ,  
699 D. & WERNEGREEN, J. J. 2013. Animals in a bacterial world, a new imperative for  
700 the life sciences. *Proceedings of the National Academy of Sciences of the United*  
701 *States of America*, 110, 3229-36.
- 702 MILAN, N. F., KACSOH, B. Z. & SCHLENKE, T. A. 2012. Alcohol consumption as self-  
703 medication against blood-borne parasites in the fruit fly. *Current Biology*, 22, 488-  
704 493.
- 705 MIRABITO, D. & ROSENGAUS, R. B. 2016. A double-edged sword? The cost of  
706 proctodeal trophallaxis in termites. *Insectes Sociaux*, 63, 135-141.
- 707 MOELLER, A. H., CARO-QUINTERO, A., MJUNGU, D., GEORGIEV, A. V.,  
708 LONSDORF, E. V., MULLER, M. N., PUSEY, A. E., PEETERS, M., HAHN, B. H.  
709 & OCHMAN, H. 2016. Cospeciation of gut microbiota with hominids. *Science*, 353,  
710 380-382.
- 711 MORAN, N. A., OCHMAN, H. & HAMMER, T. J. 2019. Evolutionary and Ecological  
712 Consequences of Gut Microbial Communities. *Annual Review of Ecology, Evolution,*  
713 *and Systematics*, 50, 451-+.
- 714 MUELLER, U. G., GERARDO, N. M., AANEN, D. K., SIX, D. L. & SCHULTZ, T. R.  
715 2005. The evolution of agriculture in insects. *Annual Review of Ecology Evolution and*  
716 *Systematics*, 36, 563-595.
- 717 MUSHEGIAN, A. A. & EBERT, D. 2016. Rethinking "mutualism" in diverse host-symbiont  
718 communities. *Bioessays*, 38, 100-108.
- 719 NEHME, N. T., LIEGEOIS, S., KELE, B., GIAMMARINARO, P., PRADEL, E.,  
720 HOFFMANN, J. A., EWBANK, J. J. & FERRANDON, D. 2007. A model of bacterial  
721 intestinal infections in *Drosophila melanogaster*. *PLoS Pathogens*, 3, 1694-1709.
- 722 OCHMAN, H., WOROBAY, M., KUO, C. H., NDJANGO, J. B. N., PEETERS, M., HAHN,  
723 B. H. & HUGENHOLTZ, P. 2010. Evolutionary relationships of wild hominids  
724 recapitulated by gut microbial communities. *PloS Biology*, 8.

- 725 OHBAYASHI, T., TAKESHITA, K., KITAGAWA, W., NIKOH, N., KOGA, R., MENG, X.  
726 Y., TAGO, K., HORI, T., HAYATSU, M., ASANO, K., KAMAGATA, Y., LEE, B.  
727 L., FUKATSU, T. & KIKUCHI, Y. 2015. Insect's intestinal organ for symbiont  
728 sorting. *Proceedings of the National Academy of Sciences of the United States of*  
729 *America*, 112, E5179-E5188.
- 730 ONCHURU, T. O., MARTINEZ, A. J., INGHAM, C. S. & KALTENPOTH, M. 2018.  
731 Transmission of mutualistic bacteria in social and gregarious insects. *Current Opinion*  
732 *in Insect Science*, 28, 50-58.
- 733 OTTI, O., TRAGUST, S. & FELDHAAR, H. 2014. Unifying external and internal immune  
734 defences. *Trends in Ecology & Evolution*, 29, 625-634.
- 735 OVEREND, G., LUO, Y., HENDERSON, L., DOUGLAS, A. E., DAVIES, S. A. & DOW, J.  
736 A. 2016. Molecular mechanism and functional significance of acid generation in the  
737 *Drosophila* midgut. *Scientific Reports*, 6, 27242.
- 738 PALMER-YOUNG, E. C., RAFFEL, T. R. & MCFREDERICK, Q. S. 2018. pH-mediated  
739 inhibition of a bumble bee parasite by an intestinal symbiont. *Parasitology*, 146, 380-  
740 388.
- 741 PEREZ-COBAS, A. E., MAIQUES, E., ANGELOVA, A., CARRASCO, P., MOYA, A. &  
742 LATORRE, A. 2015. Diet shapes the gut microbiota of the omnivorous cockroach  
743 *Blattella germanica*. *FEMS Microbiology Ecology*, 91.
- 744 PULL, C. D., UGELVIG, L. V., WIESENHOFER, F., GRASSE, A. V., TRAGUST, S.,  
745 SCHMITT, T., BROWN, M. J. & CREMER, S. 2018. Destructive disinfection of  
746 infected brood prevents systemic disease spread in ant colonies. *eLife*, 7.
- 747 RAKOFF-NAHOUM, S., PAGLINO, J., ESLAMI-VARZANEH, F., EDBERG, S. &  
748 MEDZHITOV, R. 2004. Recognition of commensal microflora by toll-like receptors  
749 is required for intestinal homeostasis. *Cell*, 118, 229-41.
- 750 RANGER, C. M., BIEDERMANN, P. H. W., PHUNTUMART, V., BELIGALA, G. U.,  
751 GHOSH, S., PALMQUIST, D. E., MUELLER, R., BARNETT, J., SCHULTZ, P. B.,  
752 REDING, M. E. & BENZ, J. P. 2018. Symbiont selection via alcohol benefits fungus  
753 farming by ambrosia beetles. *Proceedings of the National Academy of Sciences of the*  
754 *United States of America*, 115, 4447-4452.
- 755 RATZKA, C., LIANG, C., DANDEKAR, T., GROSS, R. & FELDHAAR, H. 2011. Immune  
756 response of the ant *Camponotus floridanus* against pathogens and its obligate  
757 mutualistic endosymbiont. *Insect Biochemistry and Molecular Biology*, 41, 529-36.
- 758 RATZKE, C. & GORE, J. 2018. Modifying and reacting to the environmental pH can drive  
759 bacterial interactions. *PloS Biology*, 16, e2004248.
- 760 R CORE TEAM 2019. R: A language and environment for statistical computing. Vienna,  
761 Austria: R Foundation for Statistical Computing.
- 762 RUSSELL, J. A., SANDERS, J. G. & MOREAU, C. S. 2017. Hotspots for symbiosis:  
763 function, evolution, and specificity of ant-microbe associations from trunk to tips of  
764 the ant phylogeny (Hymenoptera: Formicidae). *Myrmecological News*, 24, 43-69.
- 765 SALEM, H., FLOREZ, L., GERARDO, N. & KALTENPOTH, M. 2015. An out-of-body  
766 experience: the extracellular dimension for the transmission of mutualistic bacteria in  
767 insects. *Proceedings of the Royal Society B-Biological Sciences*, 282, 20142957.
- 768 SCHEURING, I. & YU, D. W. 2012. How to assemble a beneficial microbiome in three easy  
769 steps. *Ecology Letters*, 15, 1300-1307.
- 770 SCOTT, J. J., OH, D. C., YUCEER, M. C., KLEPZIG, K. D., CLARDY, J. & CURRIE, C. R.  
771 2008. Bacterial protection of beetle-fungus mutualism. *Science*, 322, 63-63.
- 772 SHUKLA, S. P., PLATA, C., REICHEL, M., STEIGER, S., HECKEL, D. G.,  
773 KALTENPOTH, M., VILCINSKAS, A. & VOGEL, H. 2018. Microbiome-assisted  
774 carrion preservation aids larval development in a burying beetle. *Proceedings of the*  
775 *National Academy of Sciences of the United States of America*, 115, 11274-11279.

- 776 SLACK, E., HAPFELMEIER, S., STECHER, B., VELYKOREDKO, Y., STOEL, M.,  
777 LAWSON, M. A., GEUKING, M. B., BEUTLER, B., TEDDER, T. F., HARDT, W.  
778 D., BERCIK, P., VERDU, E. F., MCCOY, K. D. & MACPHERSON, A. J. 2009.  
779 Innate and adaptive immunity cooperate flexibly to maintain host-microbiota  
780 mutualism. *Science*, 325, 617-20.
- 781 STROEYMEYT, N., GRASSE, A. V., CRESPI, A., MERSCH, D. P., CREMER, S. &  
782 KELLER, L. 2018. Social network plasticity decreases disease transmission in a  
783 eusocial insect. *Science*, 362, 941-945.
- 784 TENNANT, S. M., HARTLAND, E. L., PHUMOONNA, T., LYRAS, D., ROOD, J. I.,  
785 ROBINS-BROWNE, R. M. & VAN DRIEL, I. R. 2008. Influence of gastric acid on  
786 susceptibility to infection with ingested bacterial pathogens. *Infection and Immunity*,  
787 76, 639-645.
- 788 THERNEAU, T. 2019. coxme: Mixed Effects Cox Models. R package version 2.2-14.  
789 <http://CRAN.R-project.org/package=coxme>.
- 790 TRAGUST, S. 2016. External immune defence in ant societies (Hymenoptera: Formicidae):  
791 The role of antimicrobial venom and metapleural gland secretion. *Myrmecological*  
792 *News*, 23, 119-128.
- 793 TRAGUST, S., MITTEREGGER, B., BARONE, V., KONRAD, M., UGELVIG, L. V. &  
794 CREMER, S. 2013. Ants disinfect fungus-exposed brood by oral uptake and spread of  
795 their poison. *Current Biology*, 23, 76-82.
- 796 TRIENENS, M., KELLER, N. P. & ROHLFS, M. 2010. Fruit, flies and filamentous fungi -  
797 experimental analysis of animal-microbe competition using *Drosophila melanogaster*  
798 and *Aspergillus* mould as a model system. *Oikos*, 119, 1765-1775.
- 799 VANDER WALL, S. B. 1990. *Food hoarding in animals*, Chicago, Illinois, USA, University  
800 of Chicago Press.
- 801 VOGEL, H., SHUKLA, S. P., ENGL, T., WEISS, B., FISCHER, R., STEIGER, S.,  
802 HECKEL, D. G., KALTENPOTH, M. & VILCINSKAS, A. 2017. The digestive and  
803 defensive basis of carcass utilization by the burying beetle and its microbiota. *Nature*  
804 *Communications*, 8, 15186.
- 805 WATNICK, P. I. & JUGDER, B. E. 2020. Microbial control of intestinal homeostasis via  
806 enteroendocrine cell innate immune signaling. *Trends in Microbiology*, 28, 141-149.
- 807 WILLIAMS, L. E. & WERNEGREN, J. J. 2015. Genome evolution in an ancient bacteria-  
808 ant symbiosis: parallel gene loss among *Blochmannia* spanning the origin of the ant  
809 tribe Camponotini. *PeerJ*, 3, e881.
- 810 XIAO, R., WANG, X., XIE, E., JI, T., LI, X., MUHAMMAD, A., YIN, X., HOU, Y. & SHI,  
811 Z. 2019. An IMD-like pathway mediates the intestinal immunity to modulate the  
812 homeostasis of gut microbiota in *Rhynchophorus ferrugineus* Olivier (Coleoptera:  
813 Dryophthoridae). *Developmental & Comparative Immunology*, 97, 20-27.
- 814 YEK, S. H. & MUELLER, U. G. 2011. The metapleural gland of ants. *Biological Reviews of*  
815 *the Cambridge Philosophical Society*, 86, 774-91.

816

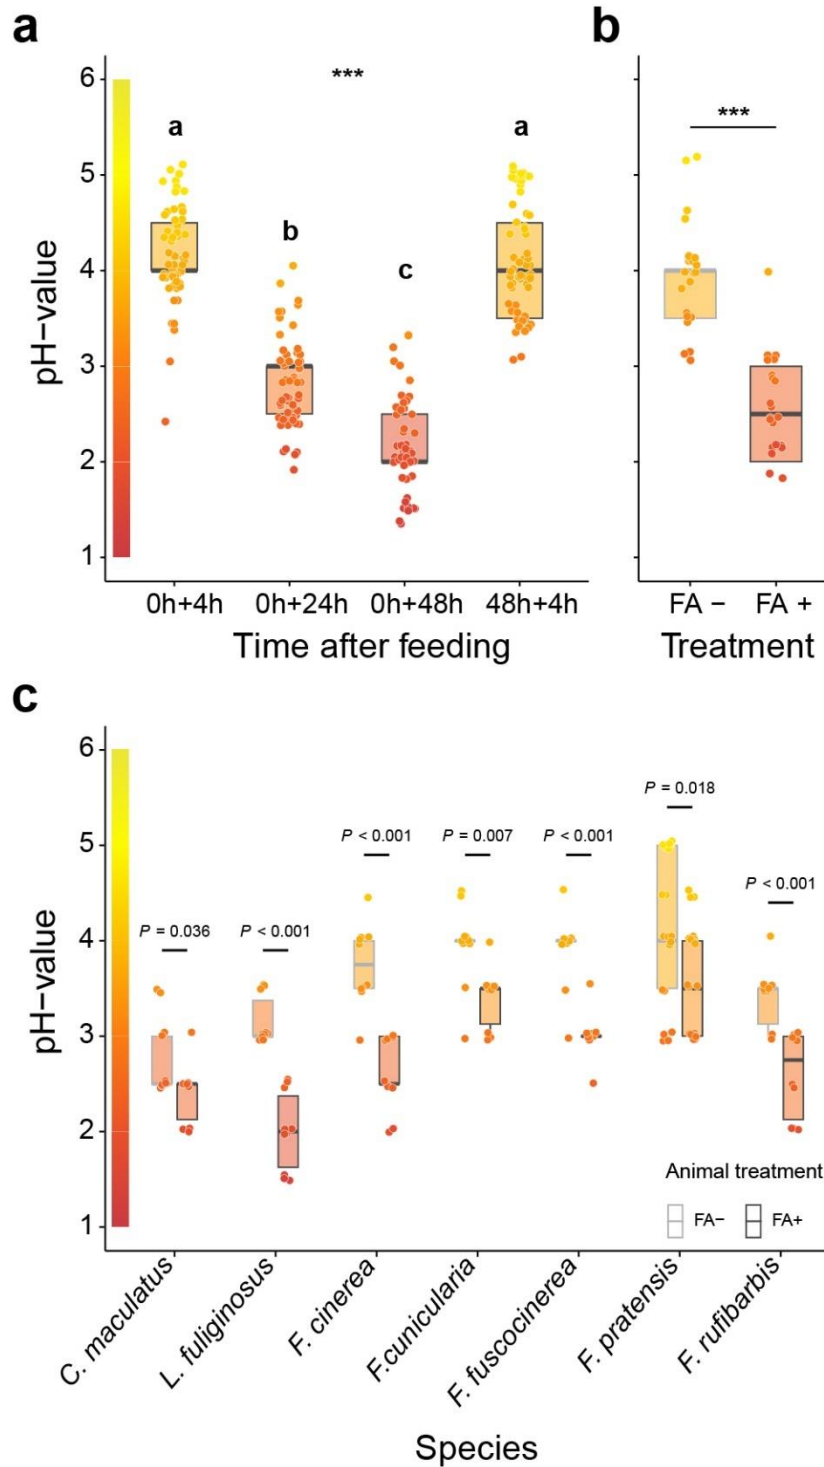

817

818 **Fig. 1. Acidification of crop lumen through swallowing of acidic poison gland secretions.**

819 **a**, pH of crop lumens at 4h, 24h and 48h after feeding *C. floridanus* ants 10% honey water

820 (pH = 5) at 0h and at 4h after re-feeding ants at 48h (LMM, LR-test,  $\chi^2 = 315.18$ ,  $df = 3$ , \*\*\*  $P$

821  $< 0.001$ , same letters indicate  $P = 0.317$  and different letters indicate  $P < 0.001$  in Westfall

822 corrected post hoc comparisons). **b**, pH of crop lumens in *C. floridanus* ants that were either

823 prevented to ingest formic acid containing poison gland secretions (FA-) or not (FA+) for 24h  
824 after feeding (LMM, LR-test,  $\chi^2 = 44.68$ ,  $df = 1$ , \*\*\* $P < 0.001$ ). **c**, pH-value of crop lumens  
825 24h after feeding in seven formicine ant species that were either prevented to ingest formic  
826 acid containing poison gland secretions (FA-) or not (FA+). Wilcoxon rank sum tests (two-  
827 sided). Lines and shaded boxes show median and interquartile range; points show all data.  
828 Colours in shaded boxes and points correspond to universal indicator pH colours. Border of  
829 shaded boxes represents animal treatment (light grey: prevention of poison ingestion, FA-;  
830 dark grey: poison ingestion not prevented, FA+).

831

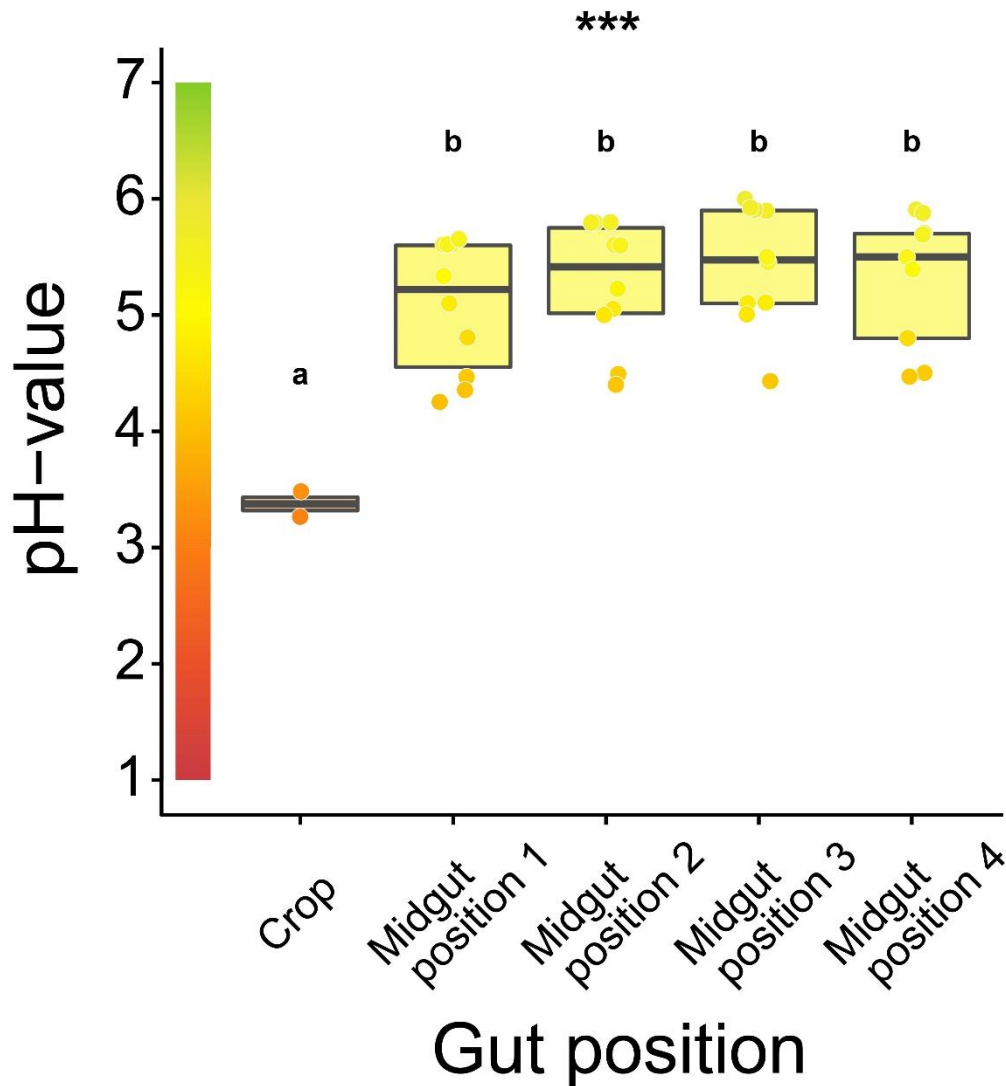

832

833 **Fig. 1 – figure supplement 1: Acidification along the gastrointestinal tract of *C.***

834 *floridanus*. pH-measurements 24h after access to 10% honey-water in the crop (N = 2) and

835 directly after the proventriculus at four points along the midgut (N = 10 except position 4 with

836 N = 9) (LMM, LR-test,  $\chi^2=22.152$ ,  $df=4$ , \*\*\*  $P < 0.001$ , same letters indicate  $P \geq 0.443$  and

837 different letters indicate  $P < 0.001$  in Westfall corrected post hoc comparisons).

838

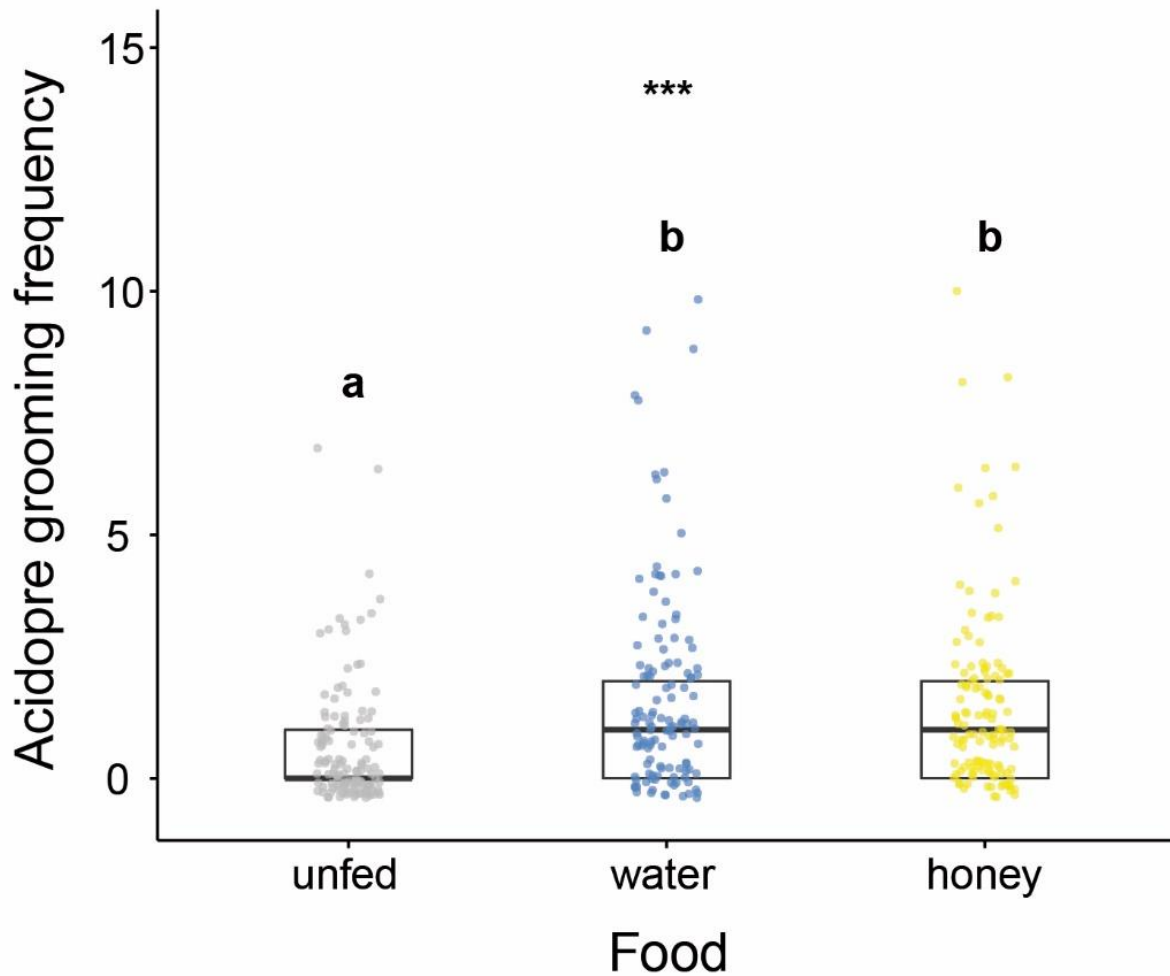

839

840 **Fig. 1 – figure supplement 2: Acidopore grooming frequency of *C. floridanus*.** Frequency  
841 of acidopore grooming within 30 min. after fluid ingestion (water or 10% honey water)  
842 compared to ants that did not receive any fluid (unfed) (GLMM, LR-test,  $\chi^2=33.526$ ,  $df=2$ , \*\*\*  
843  $P < 0.001$ , same letters indicate  $P = 0.634$  and different letters indicate  $P < 0.001$  in Westfall  
844 corrected post hoc comparisons).

845



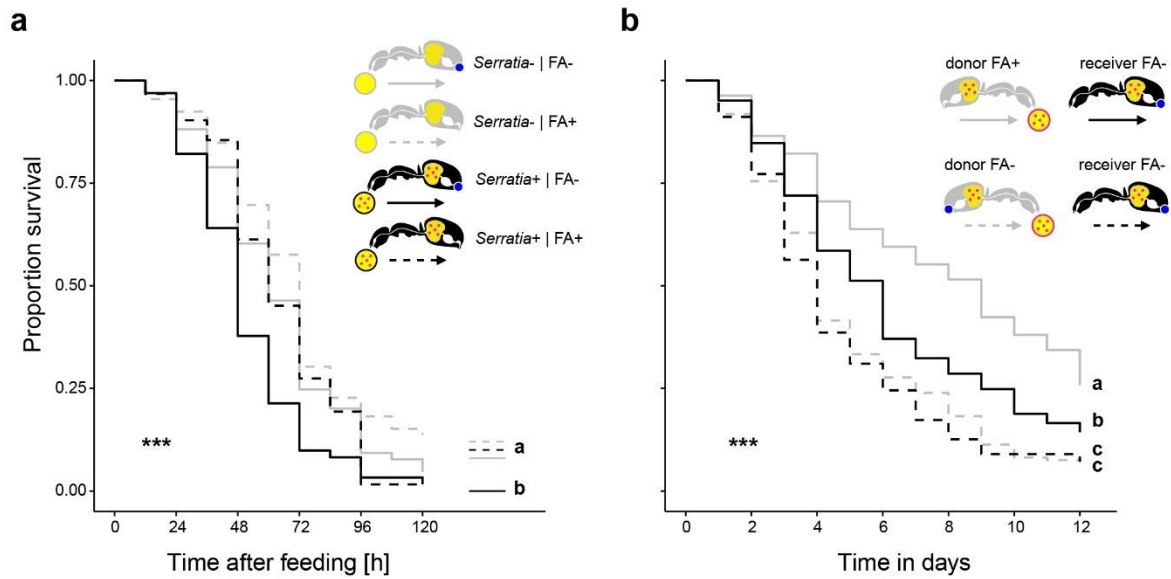

846

847 **Fig. 2. Survival after ingestion of pathogen contaminated food. a**, Survival of individual  
 848 ants that were either prevented to ingest formic acid containing poison gland secretions (FA-;  
 849 ant outlines with blue dot) or not (FA+) after feeding on either honey water contaminated  
 850 with *Serratia marcescens* (*Serratia*+, yellow circle with pink dots and black ant outlines) or  
 851 non-contaminated honey water (*Serratia*-) (COXME, LR-test,  $\chi^2 = 20.95$ ,  $df=3$ ,  $***P = 0.0001$ ,  
 852 same letters indicate  $P \geq 0.061$  and different letters indicate  $P \leq 0.027$  in Westfall corrected  
 853 post hoc comparisons). **b**, Survival of donor ants (light grey ant outlines) that were directly  
 854 fed with pathogen contaminated food (yellow circle with pink dots in insert) and were either  
 855 prevented to ingest formic acid containing poison gland secretions (FA-; ant outlines with  
 856 blue dot) or not (FA+) and survival of receiver ants (black ant outlines) that received  
 857 pathogen contaminated food only through trophallaxis with donor ants and were always  
 858 prevented to ingest formic acid containing poison gland secretions (FA-) (COXME, LR-test,  
 859  $\chi^2 = 66.68$ ,  $df = 3$ ,  $***P < 0.001$ , same letters indicate  $P = 0.309$  and different letters indicate  $P$   
 860  $\leq 0.002$  in Westfall corrected post hoc comparisons).

861

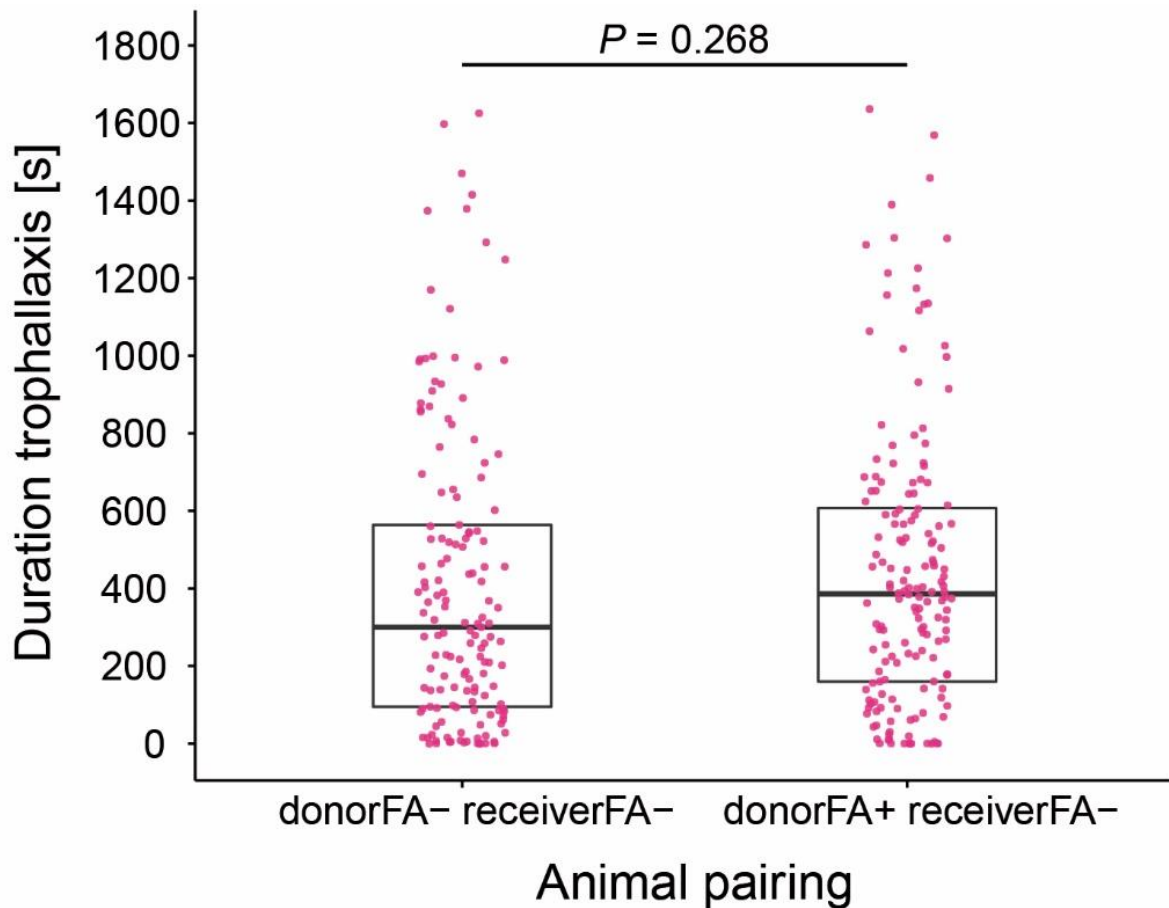

862

863 **Fig. 2 – figure supplement 1: Duration of trophallaxis in donor-receiver ant pairs.** Total

864 duration of trophallaxis events within 30 min. of the first bout of food exchange between

865 donor-receiver ant-pairs (LMM, LR-test,  $\chi^2 = 1.23$ ,  $df = 1$ ,  $P = 0.268$ ). Donor ants in both

866 pairs were directly fed with *Serratia marcescens* contaminated 10% honey water and were

867 either prevented to ingest formic acid containing poison gland secretions (FA-) or not (FA+),

868 while receiver ants received pathogen contaminated food only through trophallaxis with the

869 respective donor ants and were always prevented to ingest formic acid containing poison

870 gland secretions (FA-).

871

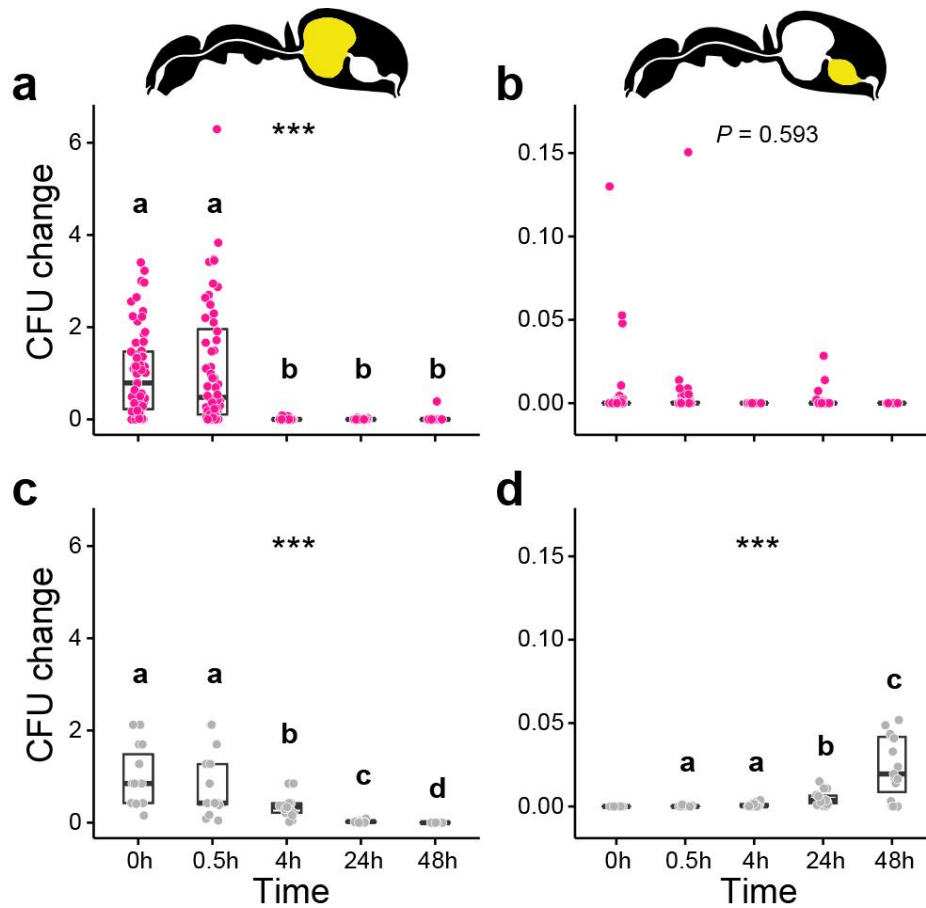

872

873 **Fig. 3. Bacterial passage through the digestive tract of *C. floridanus* over time.** Change in

874 the number of colony forming units (CFUs) in the crop (a,c) and midgut (b,d) part of the

875 digestive tract (yellow colour in insert) relative to 0h in the crop at 0h, 0.5h, 4h, 24h, and 48h

876 after feeding ants 10% honey water contaminated with *Serratia marcescens* (a,b) or *Asaia* sp.

877 (c,d). **a**, Change of *S. marcescens* in the crop (GLMM, LR-test,  $\chi^2 = 220.78$ ,  $df = 4$ , \*\*\*  $P$

878  $< 0.001$ , same letters indicate  $P \geq 0.623$  and different letters indicate  $P < 0.001$  in Westfall

879 corrected post hoc comparisons). **b**, Change of *S. marcescens* in the midgut (GLMM, LR-test,

880  $\chi^2 = 1.044$ ,  $df = 2$ ,  $P = 0.593$ ). **c**, Change of *Asaia* sp. in the crop (GLMM; LR-test,  $\chi^2 =$

881  $124.01$ ,  $df = 4$ , \*\*\*  $P < 0.001$ , same letters indicate  $P = 0.488$  and different letters indicate  $P \leq$

882  $0.013$  in Westfall corrected post hoc comparisons). **d**, Change of *Asaia* sp. in the midgut

883 (GLMM; LR-test,  $\chi^2 = 59.94$ ,  $df = 3$ , \*\*\*  $P < 0.001$ , same letters indicate  $P = 0.116$  and

884 different letters indicate  $P \leq 0.005$  in Westfall corrected post hoc comparisons).

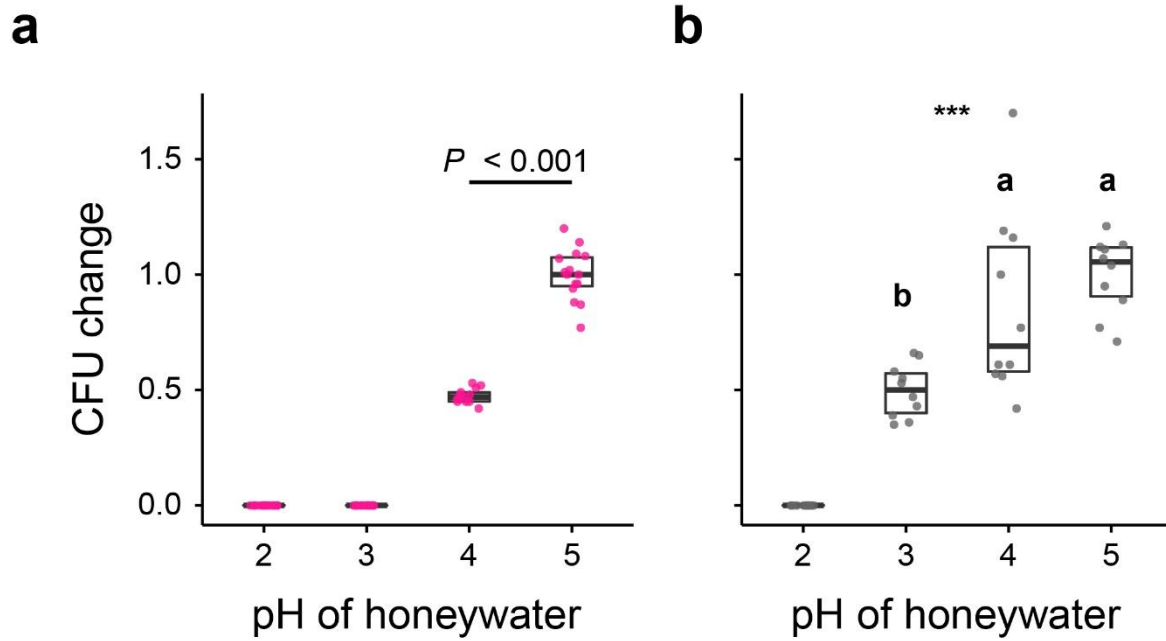

885

886 **Fig. 3 – figure supplement 1: Bacterial growth *in vitro*.** Change in the number of CFUs  
887 relative to pH 5 after incubation of *Serratia marcescens* (a) and *Asaia* sp. (b) in 10% honey  
888 water (pH = 5) or in 10% honey water acidified with commercial formic acid to a pH of 4, 3  
889 or 2 for 2h (*S. marcescens*: GLM, LR-test,  $\chi^2 = 79.442$ ,  $df = 1$ ,  $P < 0.001$ ; *Asaia* sp.: GLM,  
890 LR-test  $\chi^2 = 21.179$ ,  $df = 2$ ,  $P < 0.001$ , same letters indicate  $P = 0.234$ , and different letters  
891 indicate  $P < 0.001$  in Westfall corrected post hoc comparisons).

892

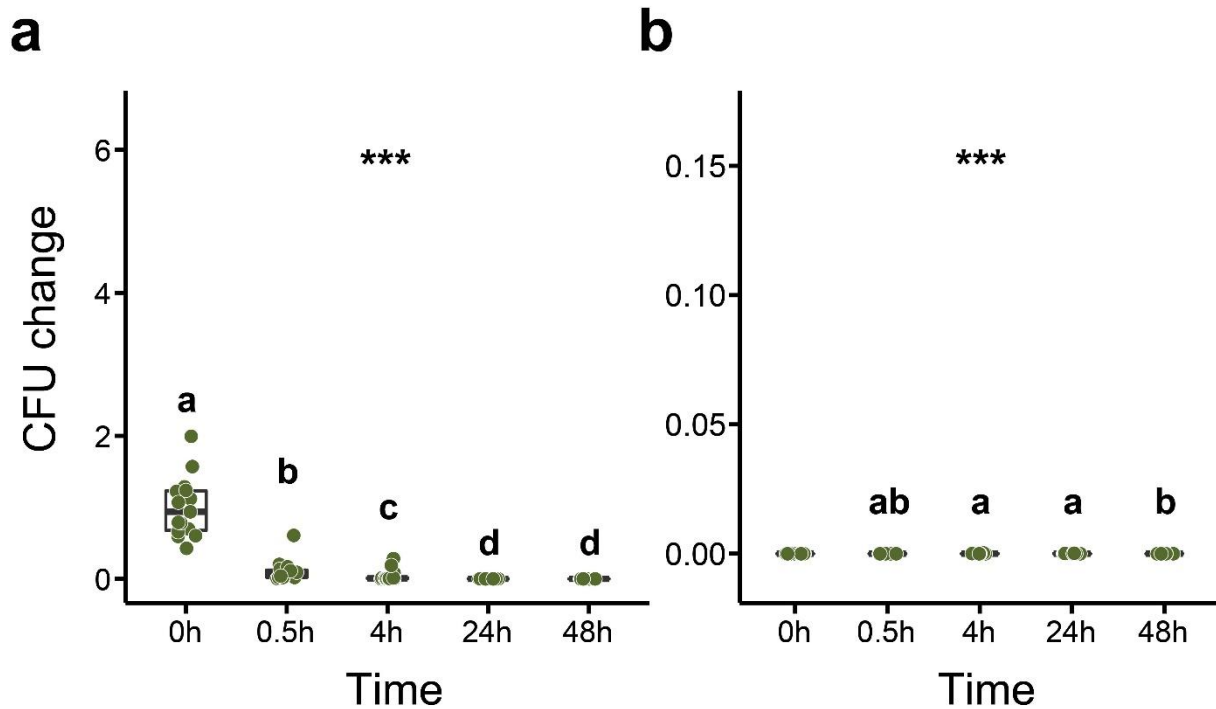

893

894 **Fig. 3 – figure supplement 2: Passage of *E. coli* through the digestive tract of *C.***

895 ***floridanus* over time.** Change in the number of colony forming units (CFUs) in the crop (a)

896 and midgut (b) part of the digestive tract relative to 0h in the crop at 0h, 0.5h, 4h, 24h, and

897 48h after feeding ants 10% honey water contaminated with *Escherichia coli*. a, Change of *E.*

898 *coli* in the crop (GLMM, LR-test,  $\chi^2 = 156.74$ ,  $df = 4$ , \*\*\*  $P < 0.001$ , same letters indicate  $P =$

899  $0.979$  and different letters indicate  $P < 0.025$  in Westfall corrected post hoc comparisons). b,

900 Change of *E. coli* in the midgut (GLMM, LR-test,  $\chi^2 = 14.898$ ,  $df = 3$ , \*\*\*  $P = 0.002$ , same

901 letters indicate  $P \geq 0.629$  and different letters indicate  $P \leq 0.038$  in Westfall corrected post

902 hoc comparisons).

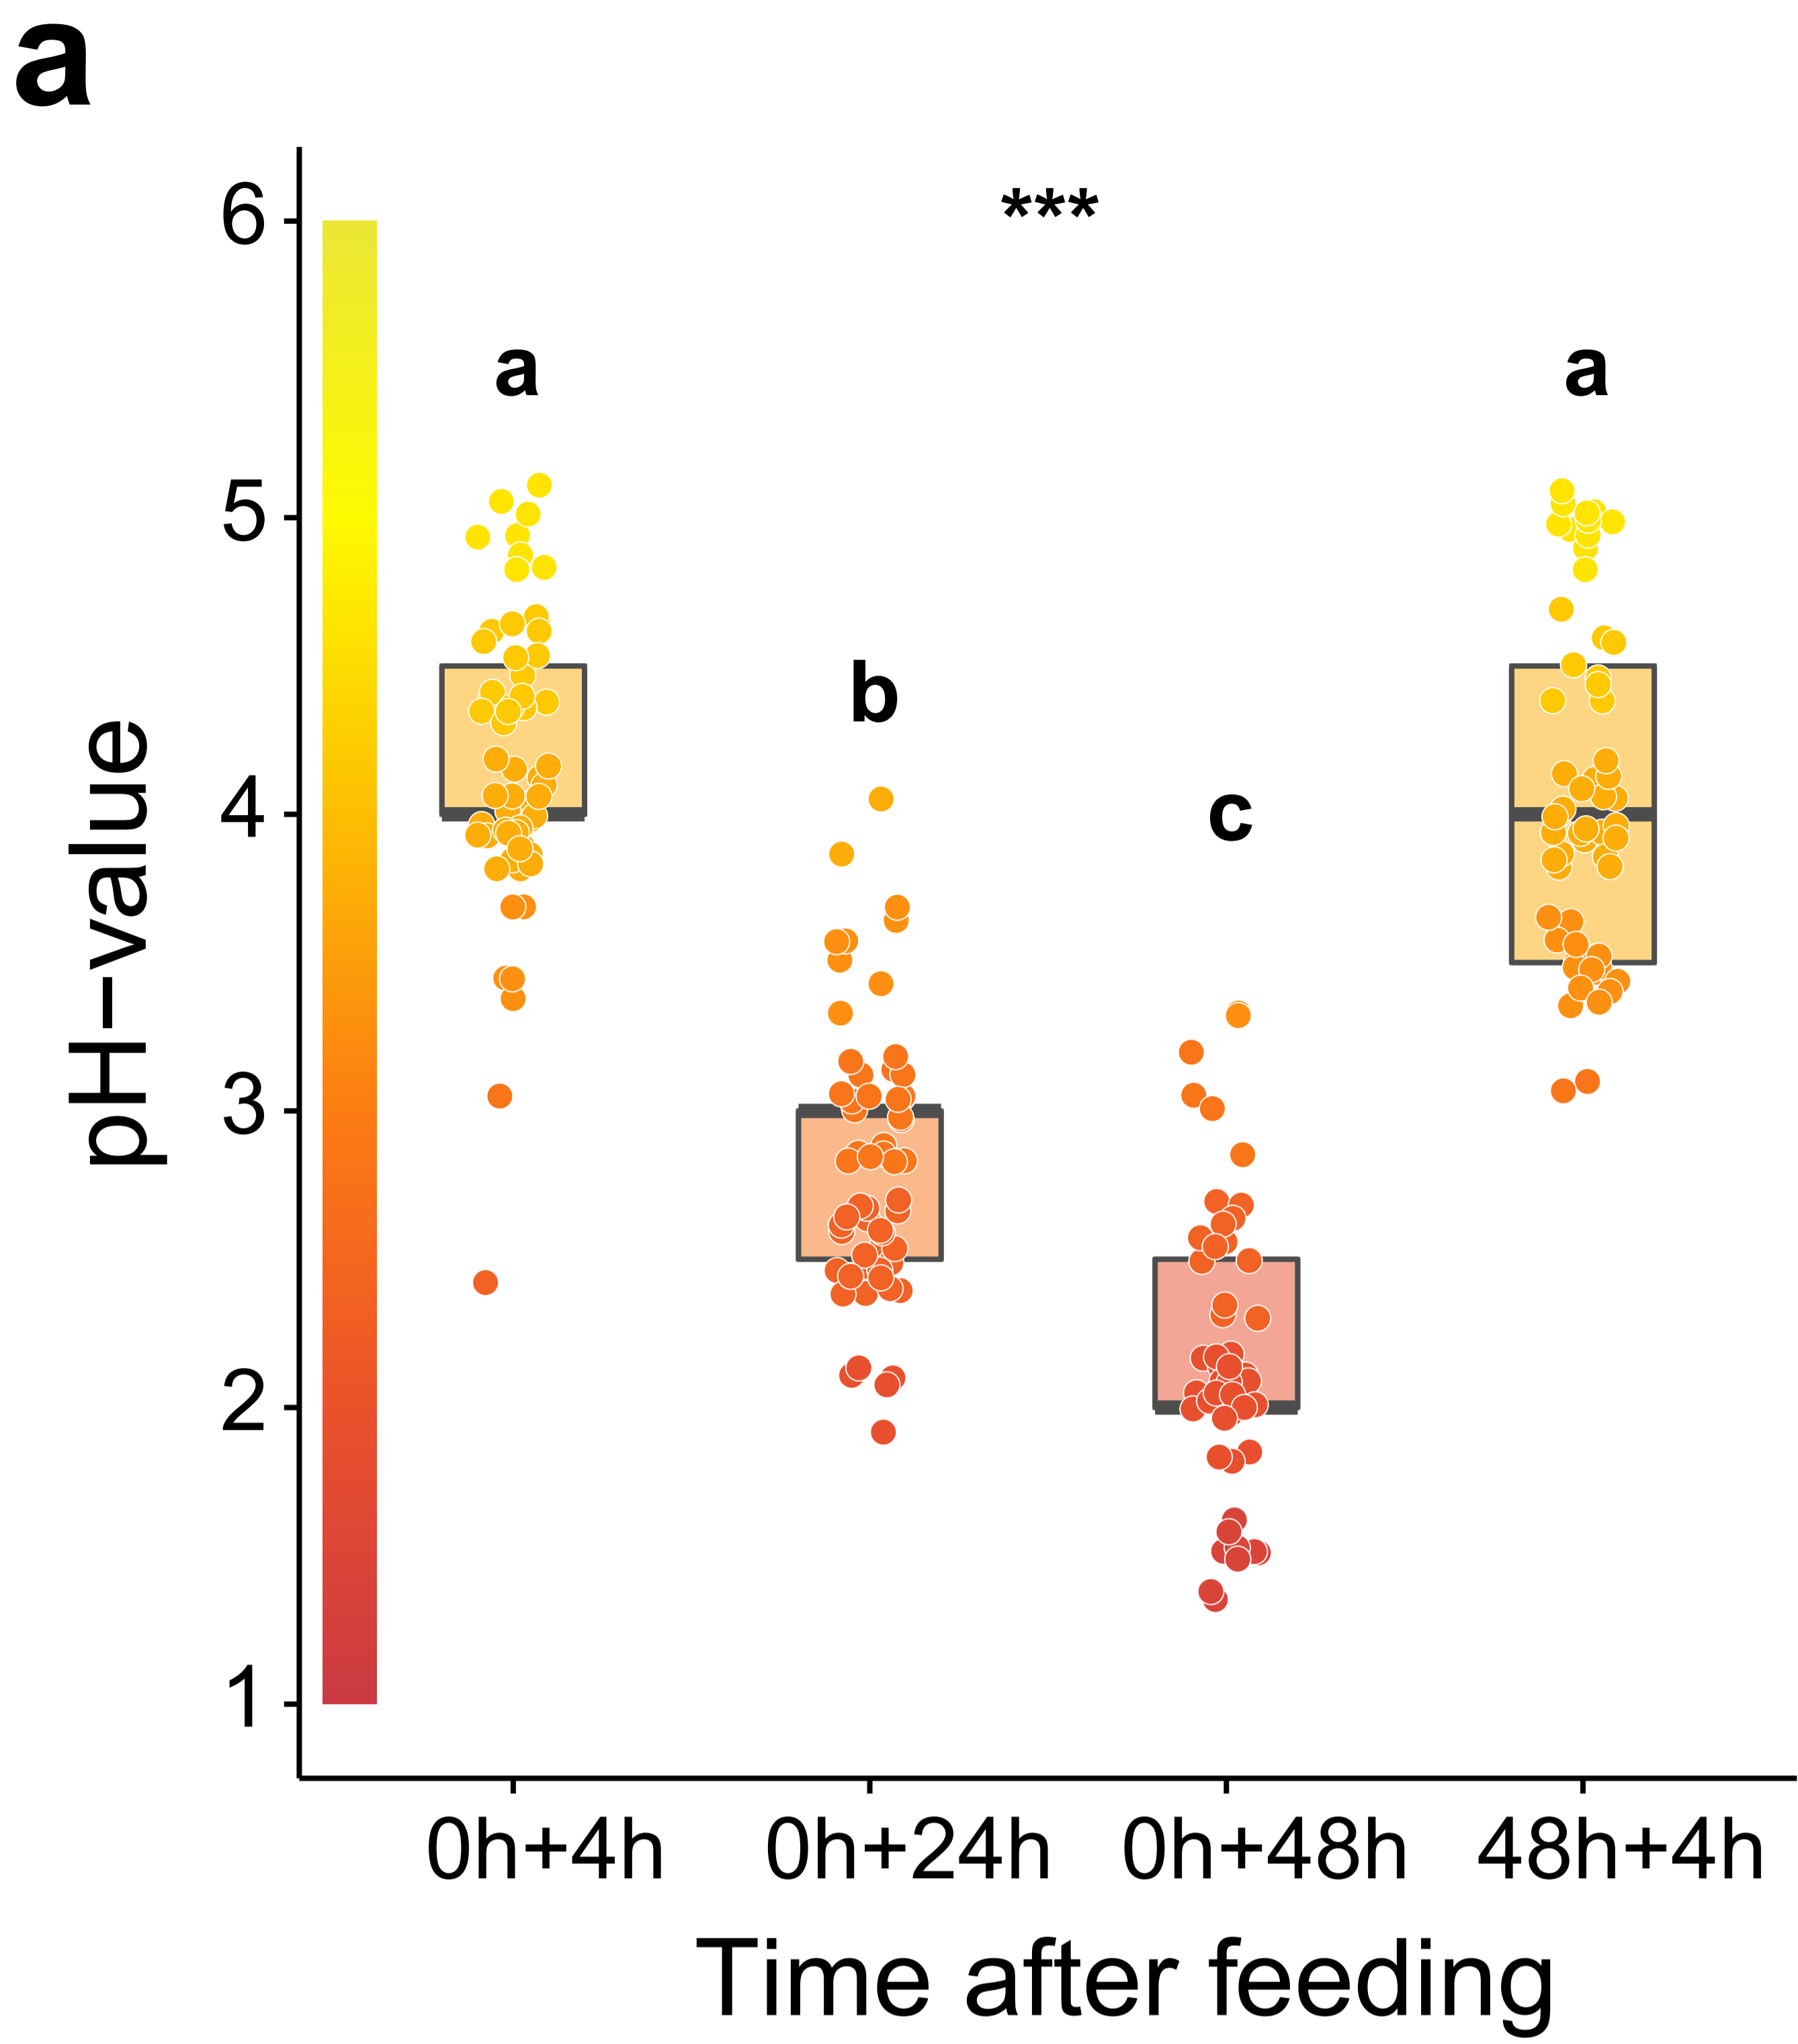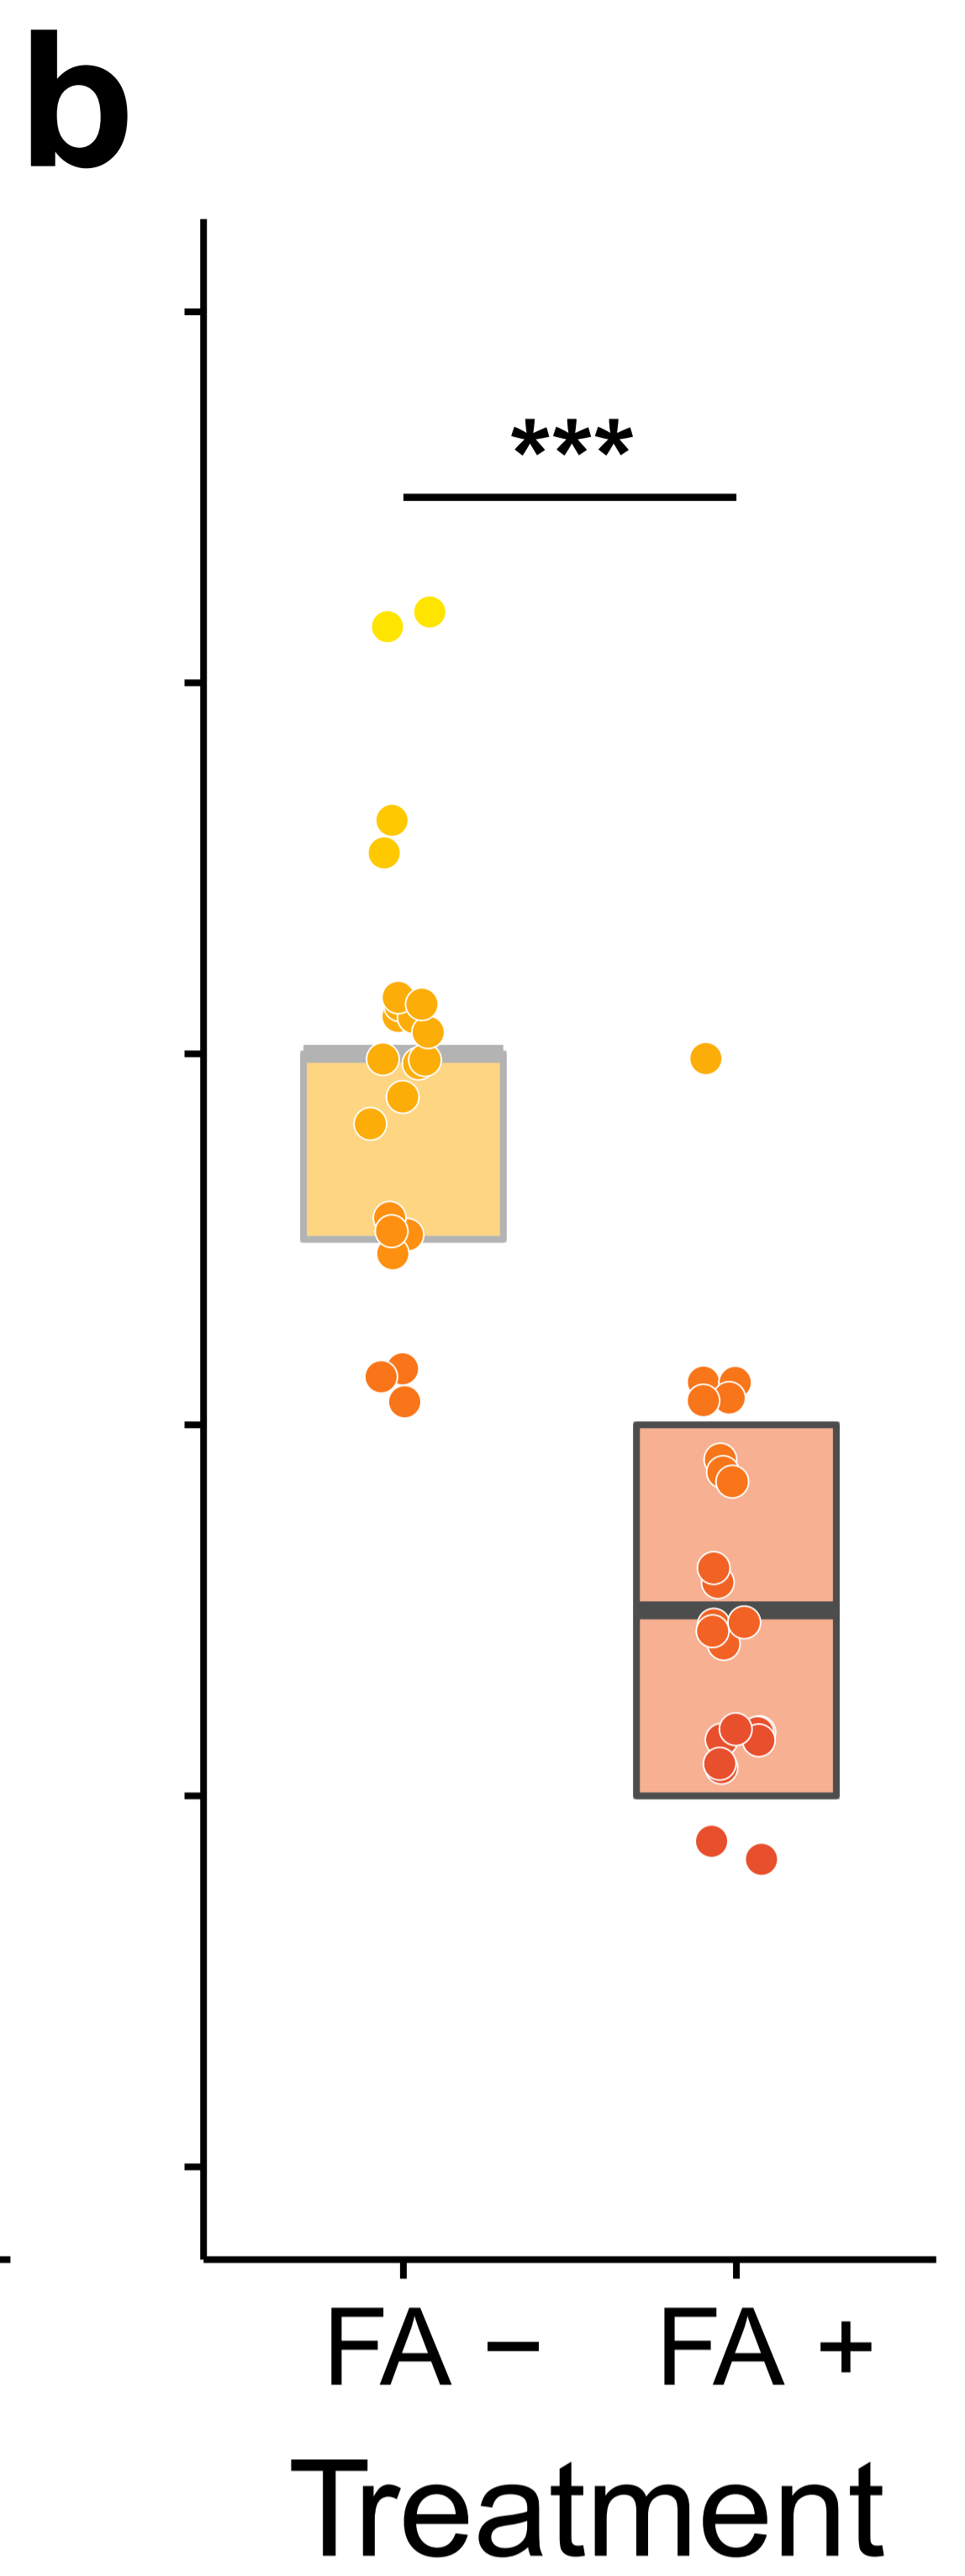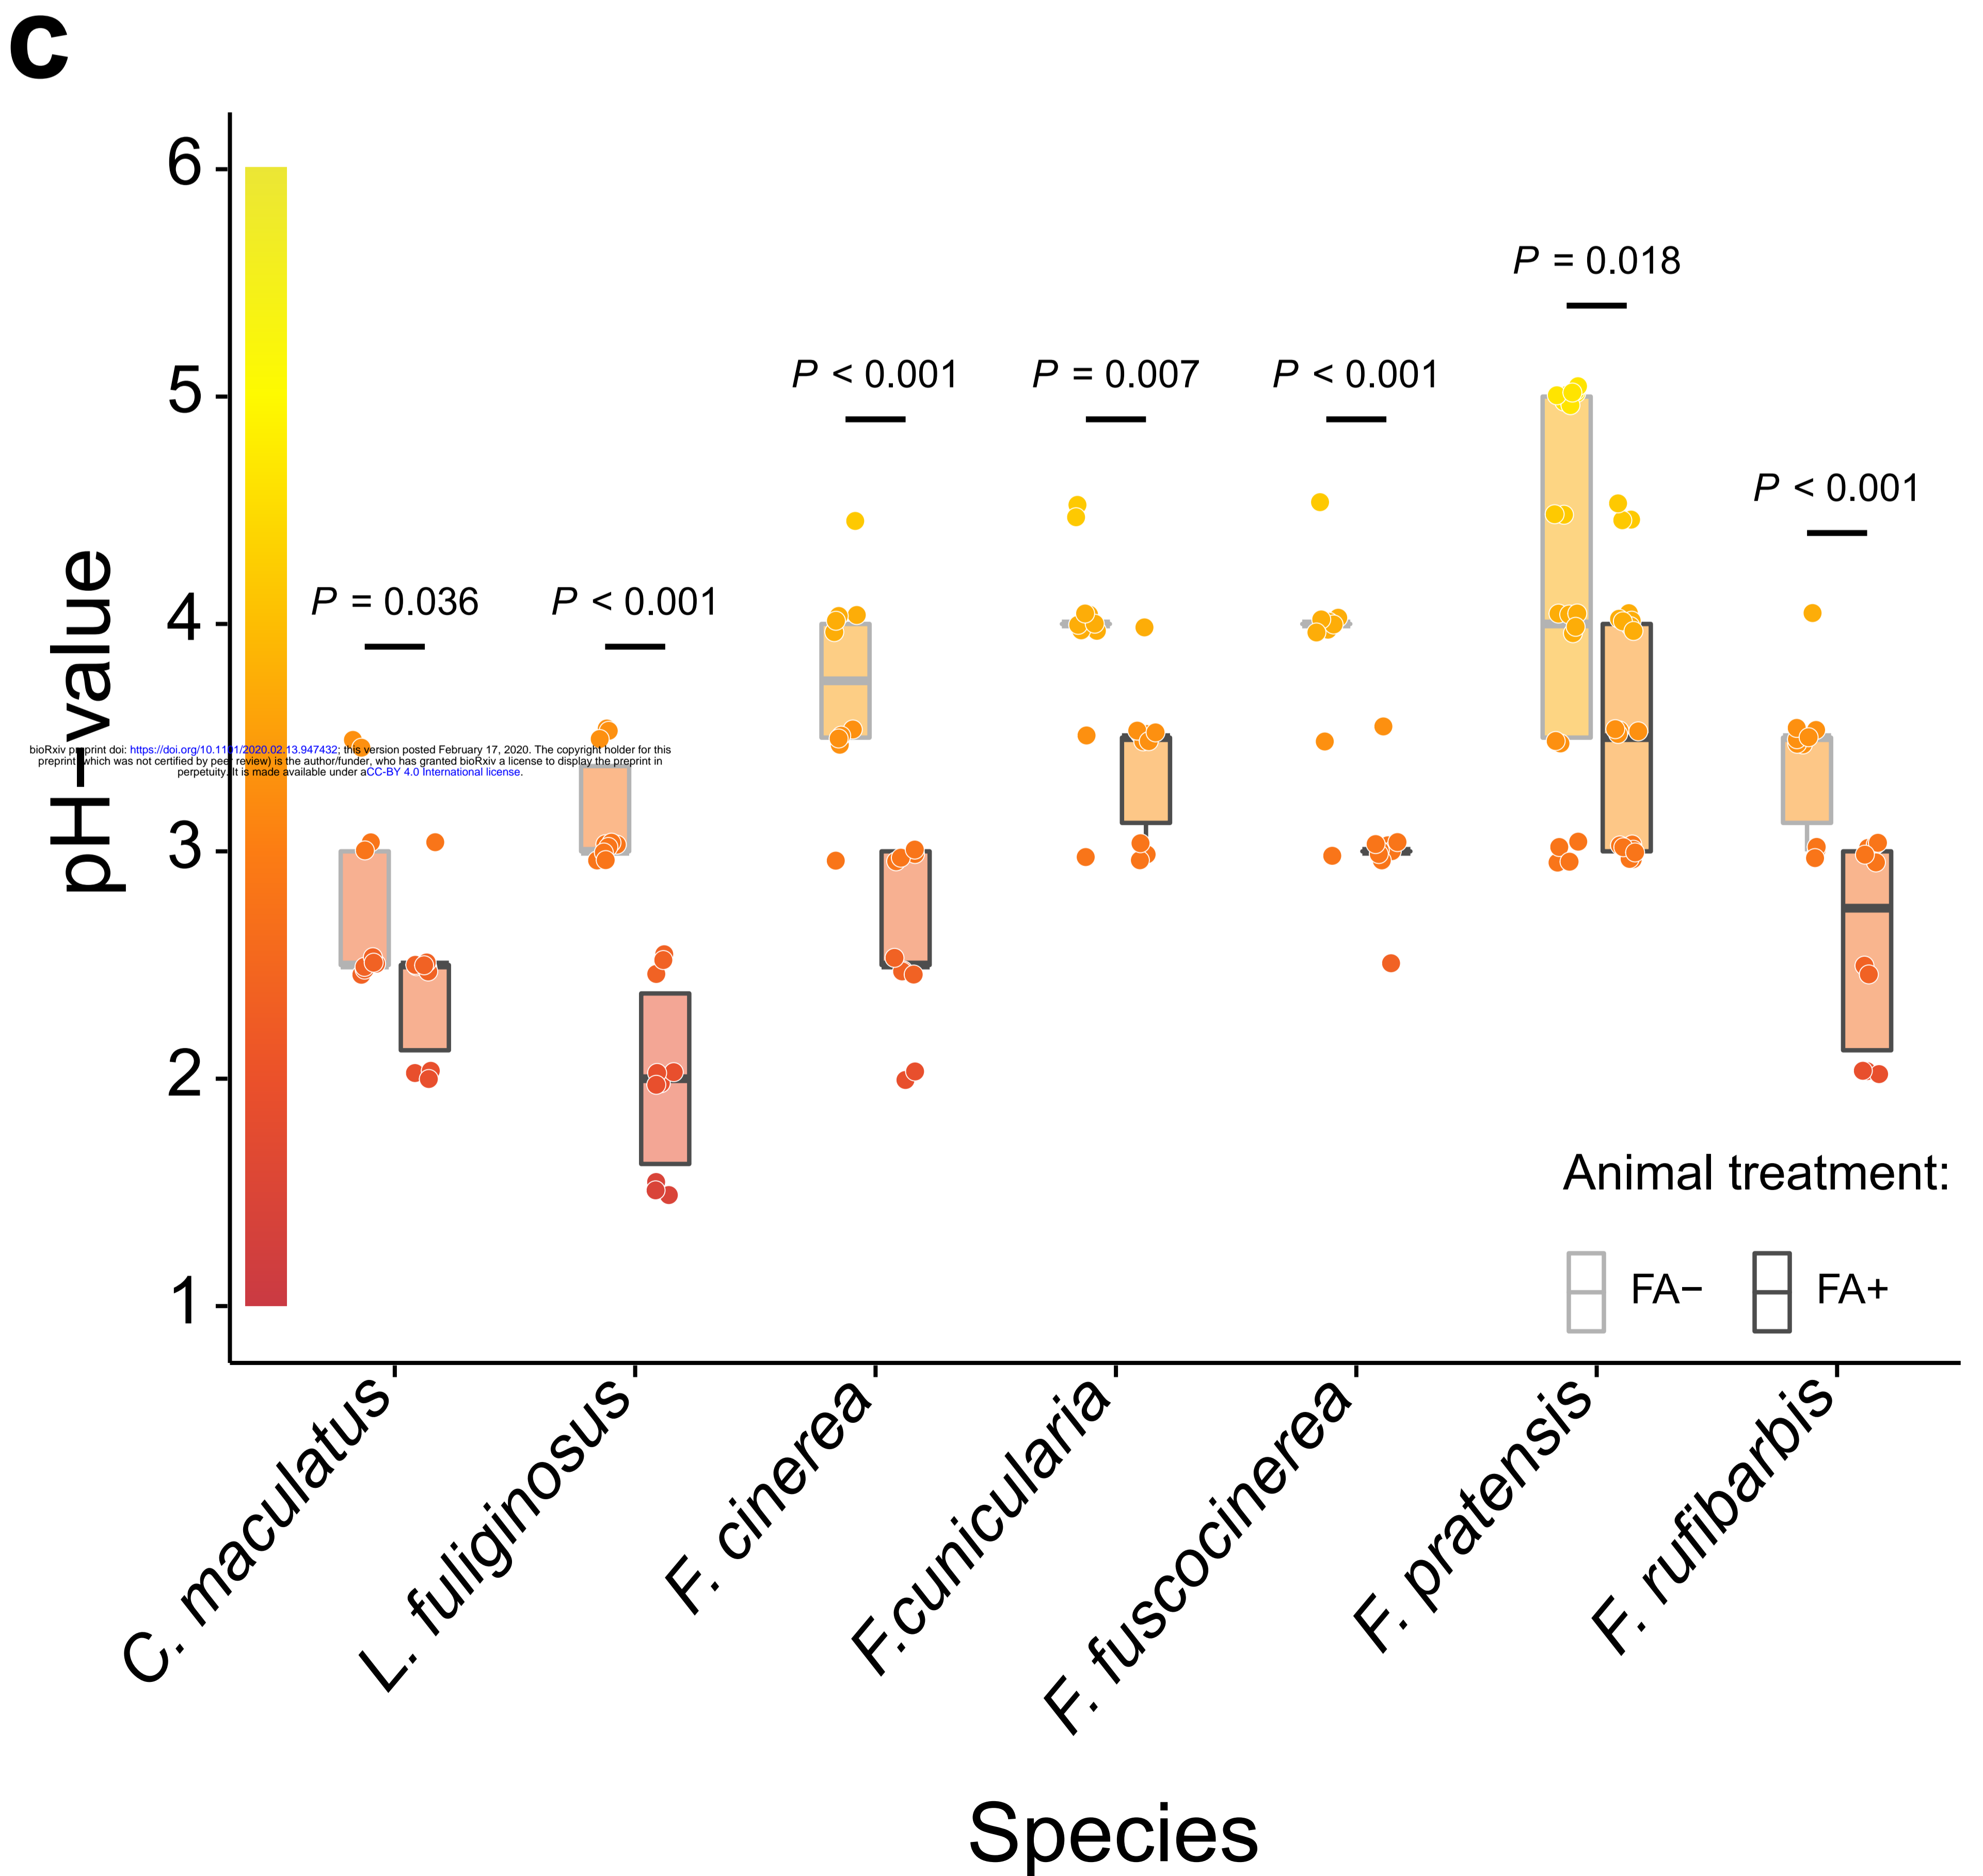

\*\*\*

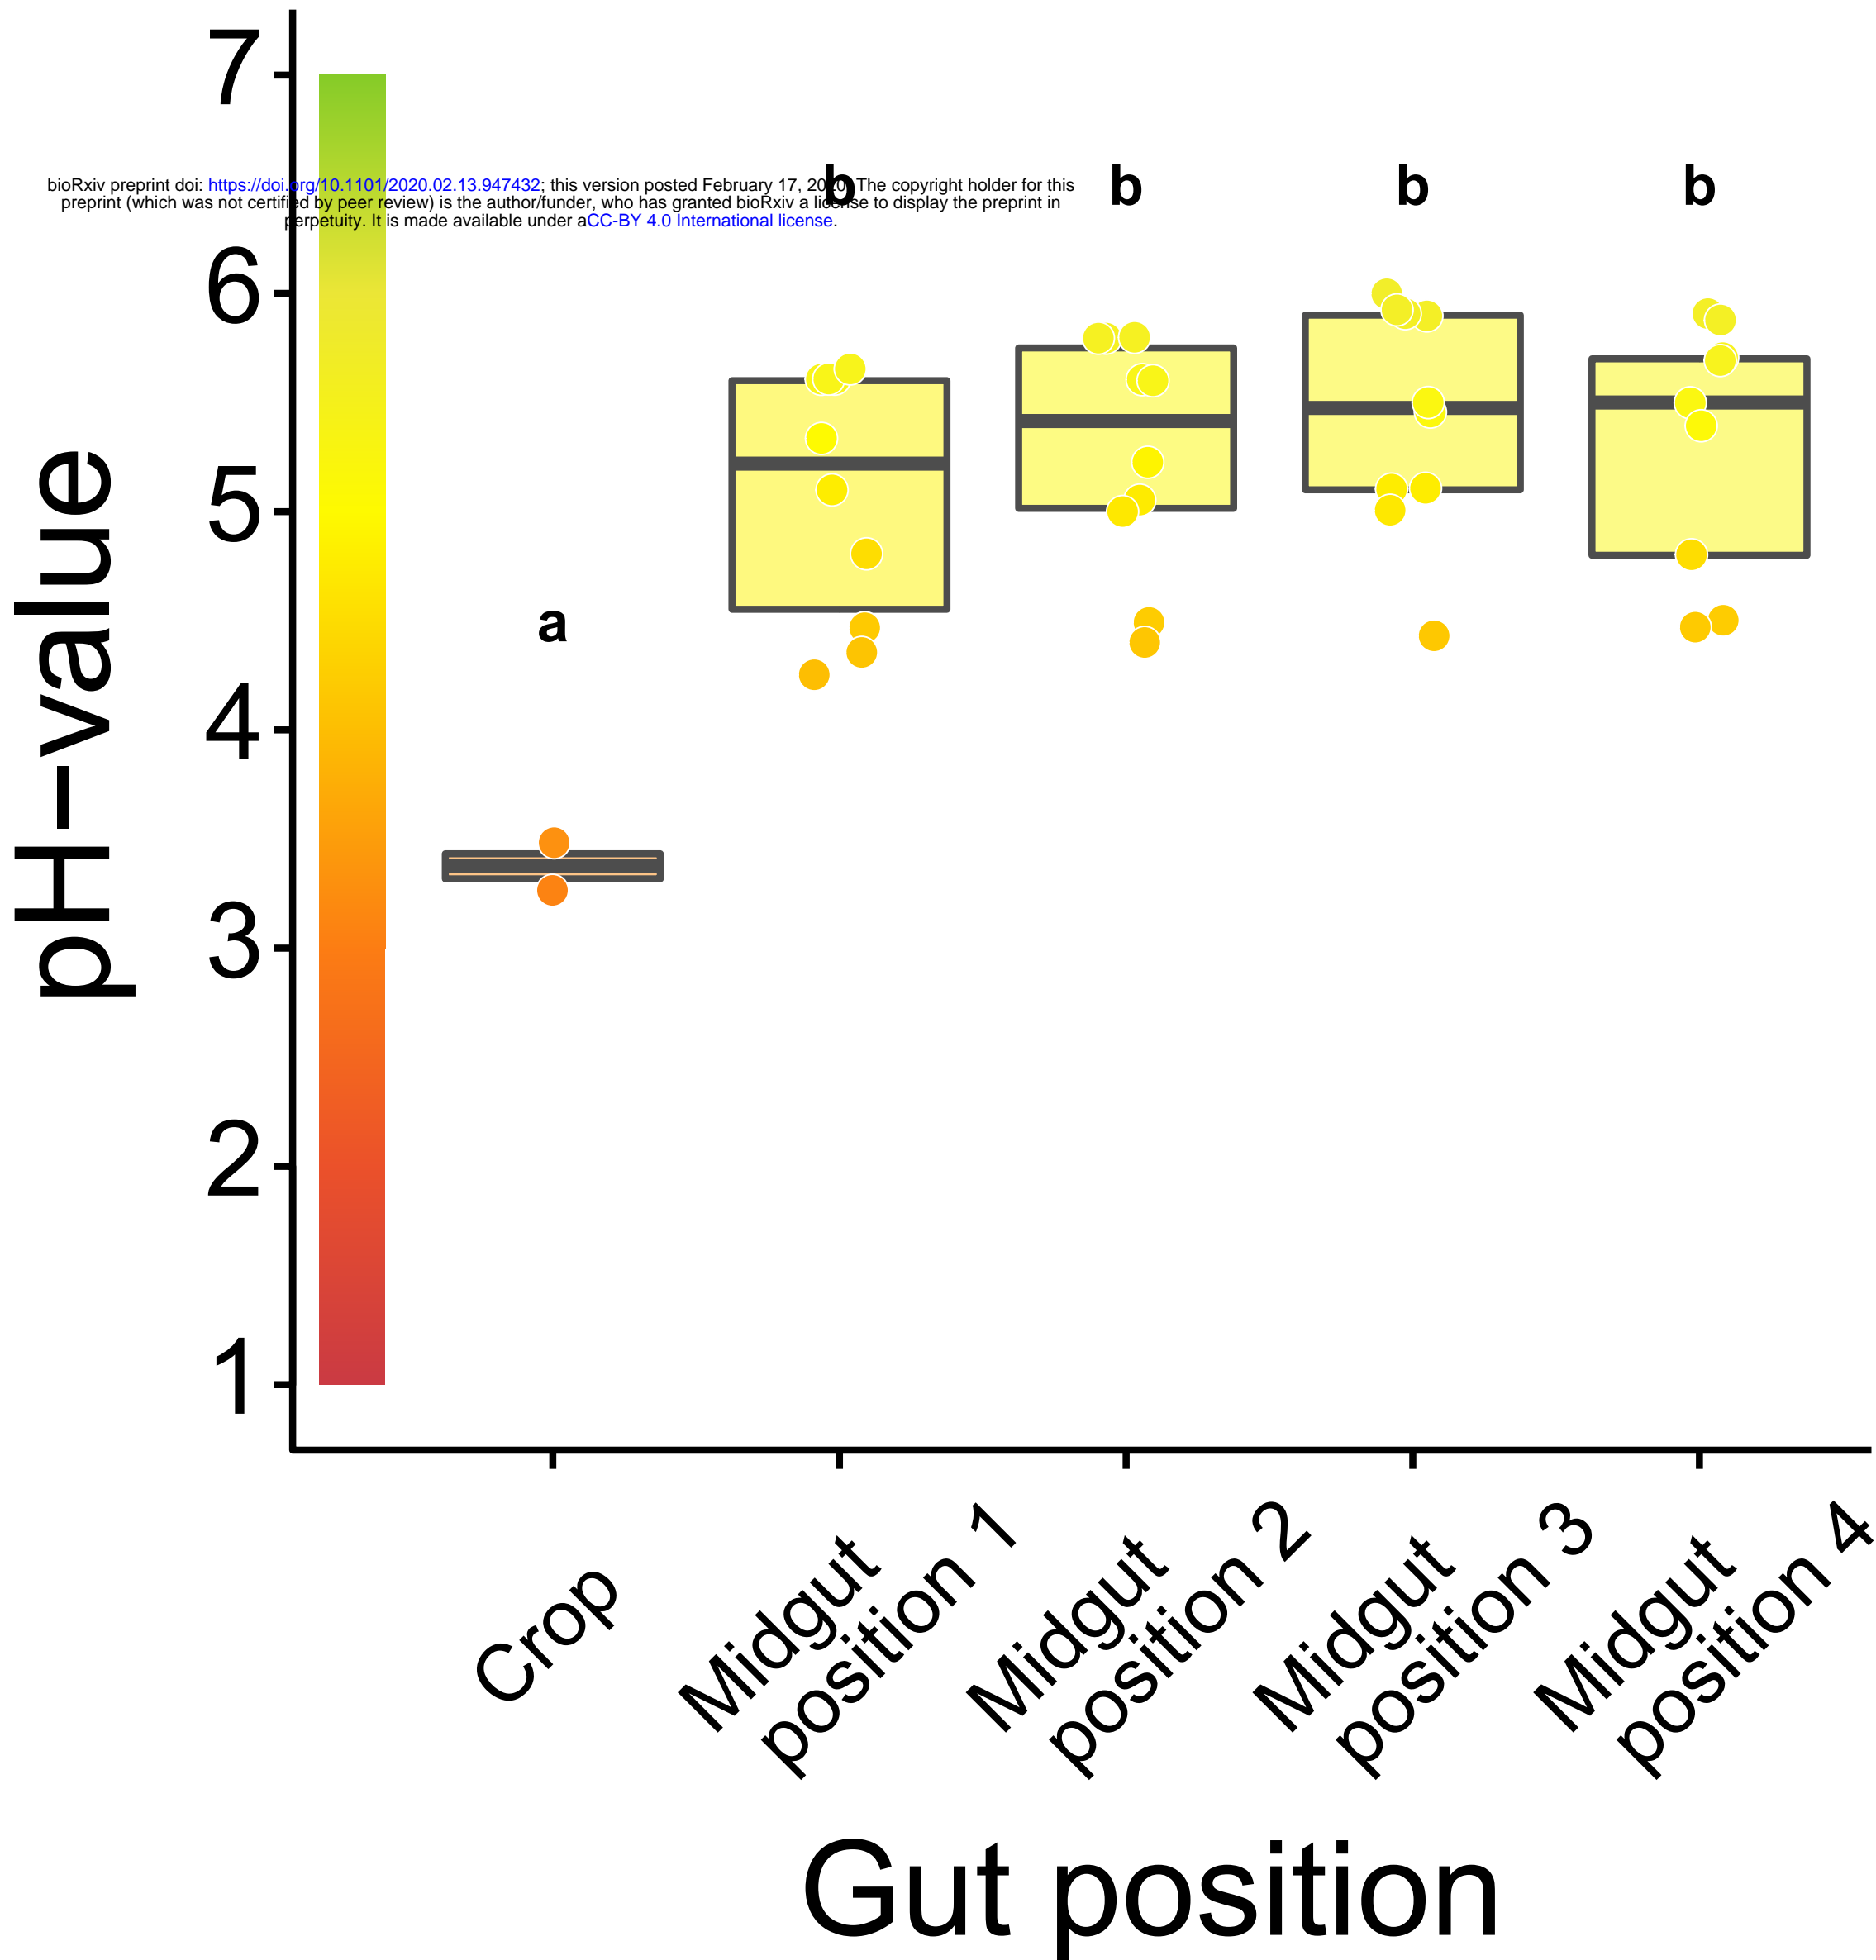

# Acidopre grooming frequency

bioRxiv preprint doi: <https://doi.org/10.1101/2020.02.13.947432>; this version posted February 17, 2020. The copyright holder for this preprint (which was not certified by peer review) is the author/funder, who has granted bioRxiv a license to display the preprint in perpetuity. It is made available under aCC-BY 4.0 International license.

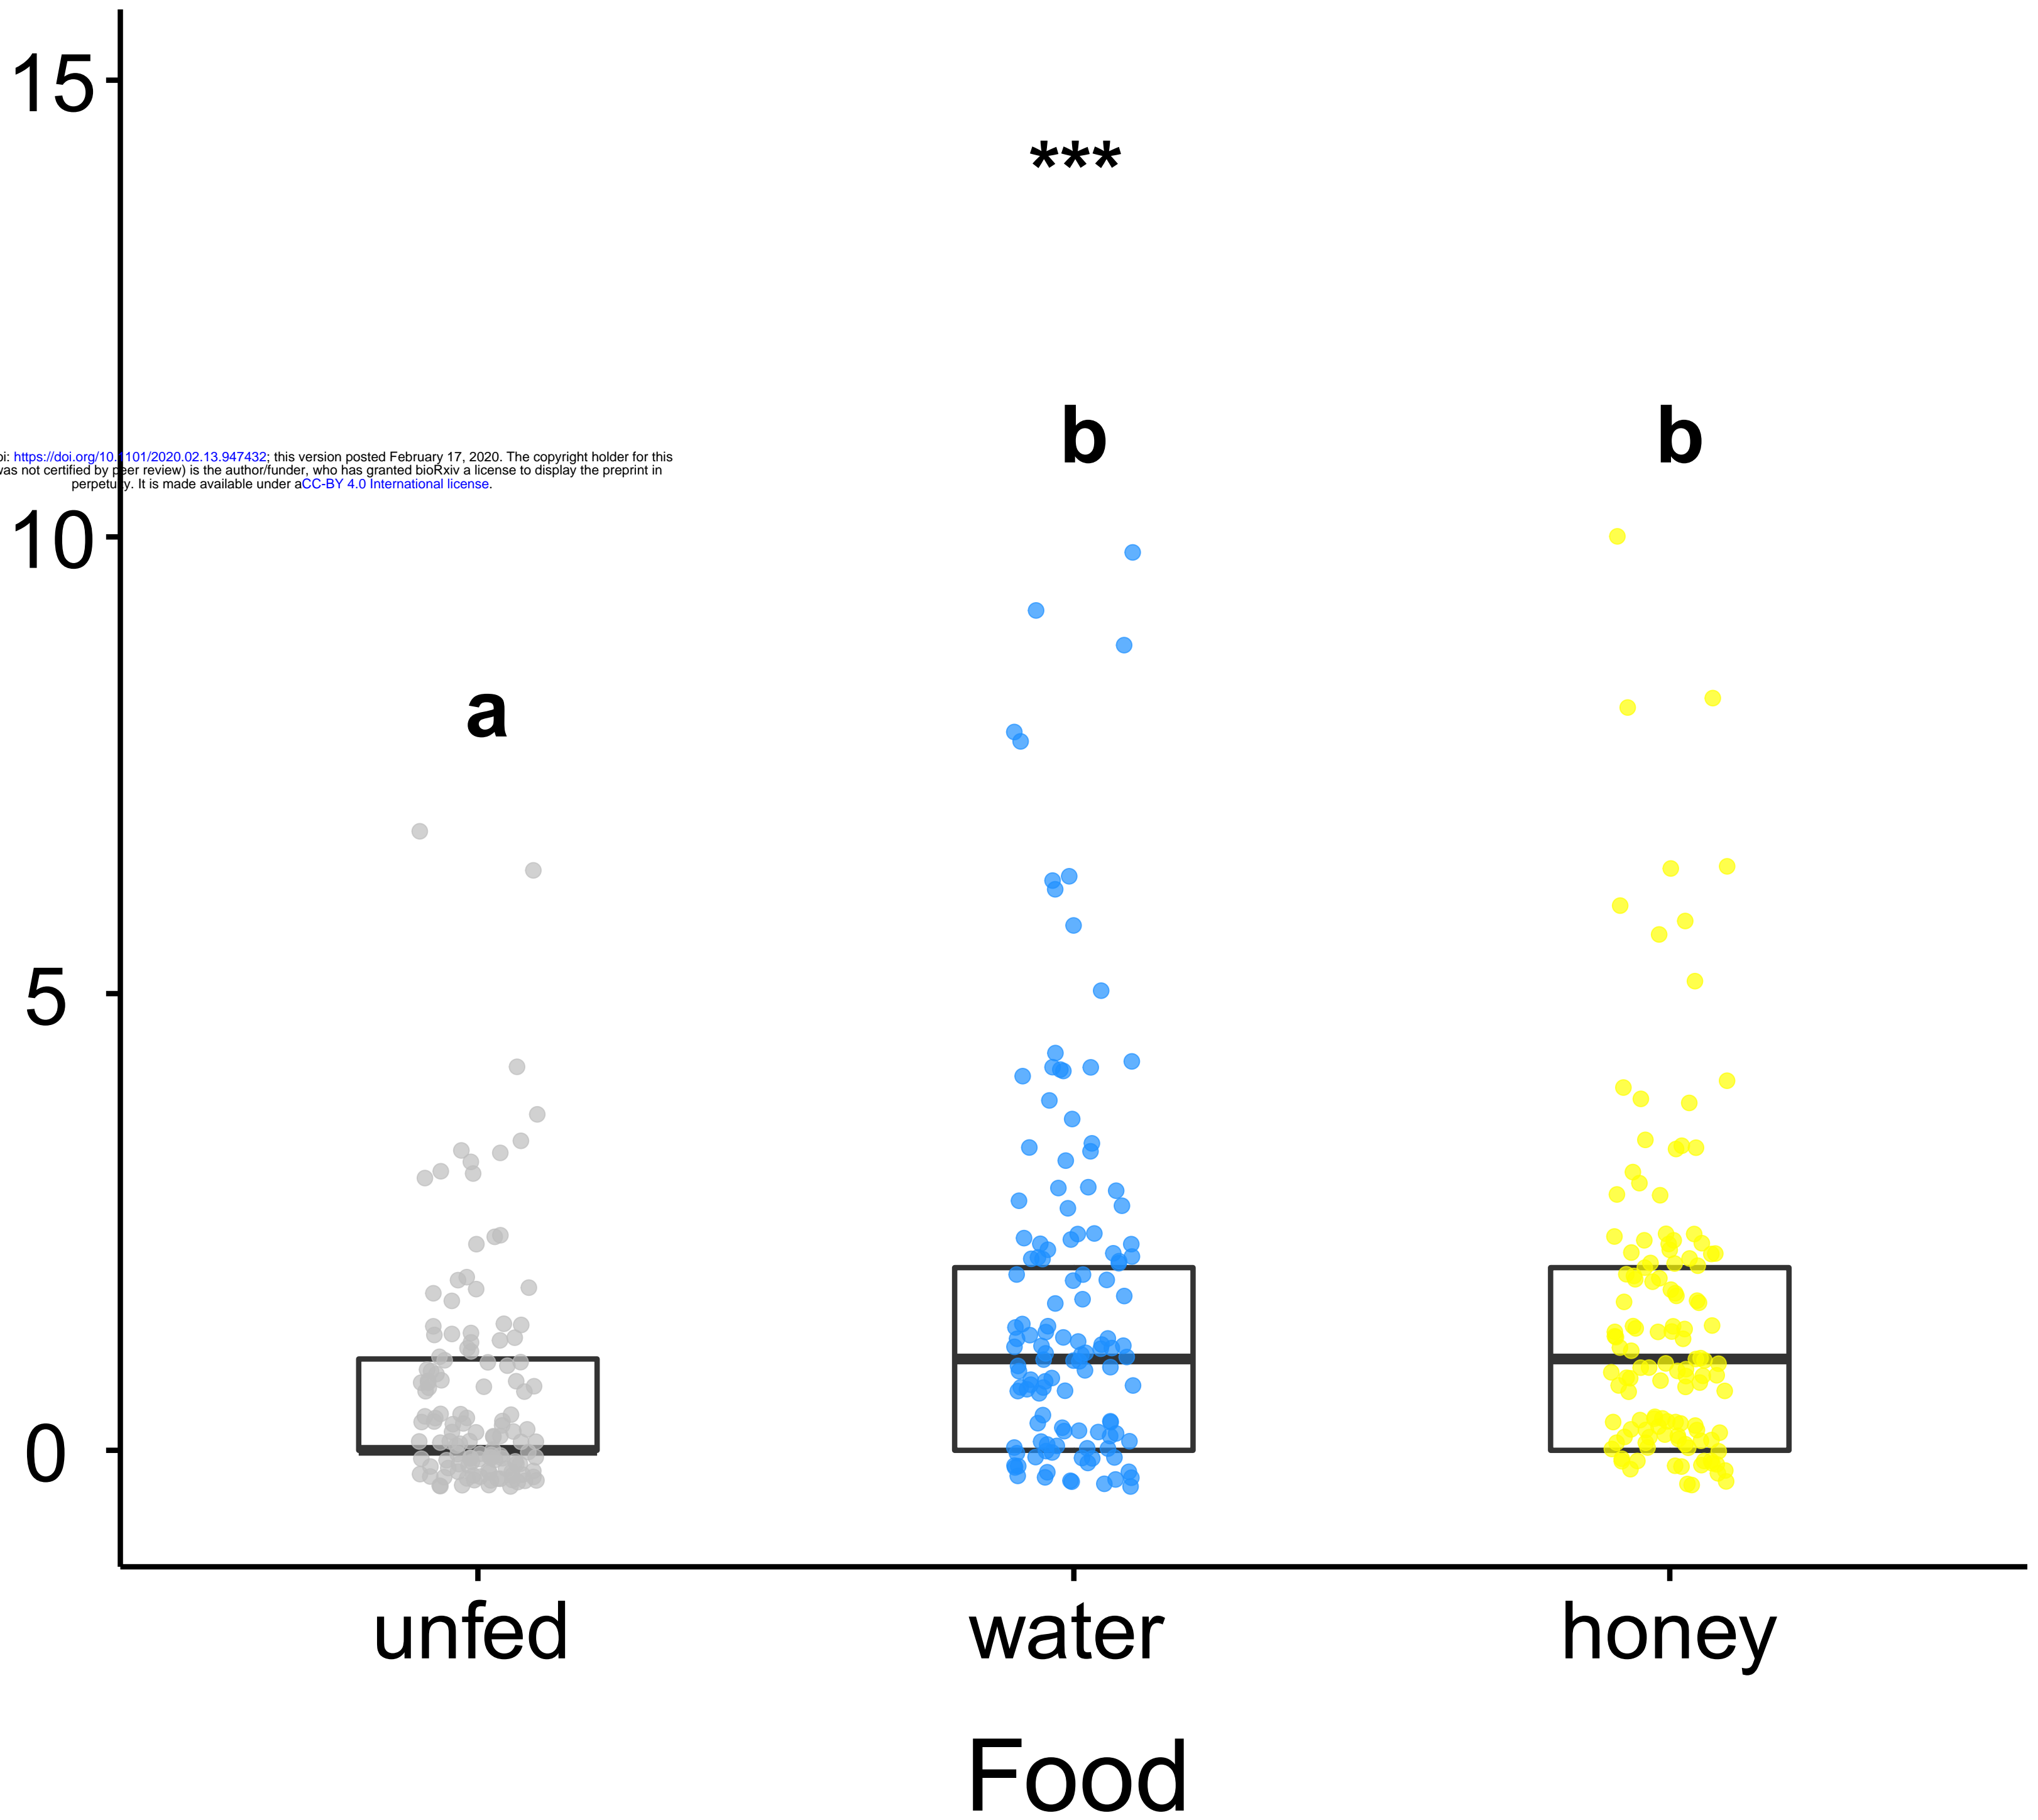



**a**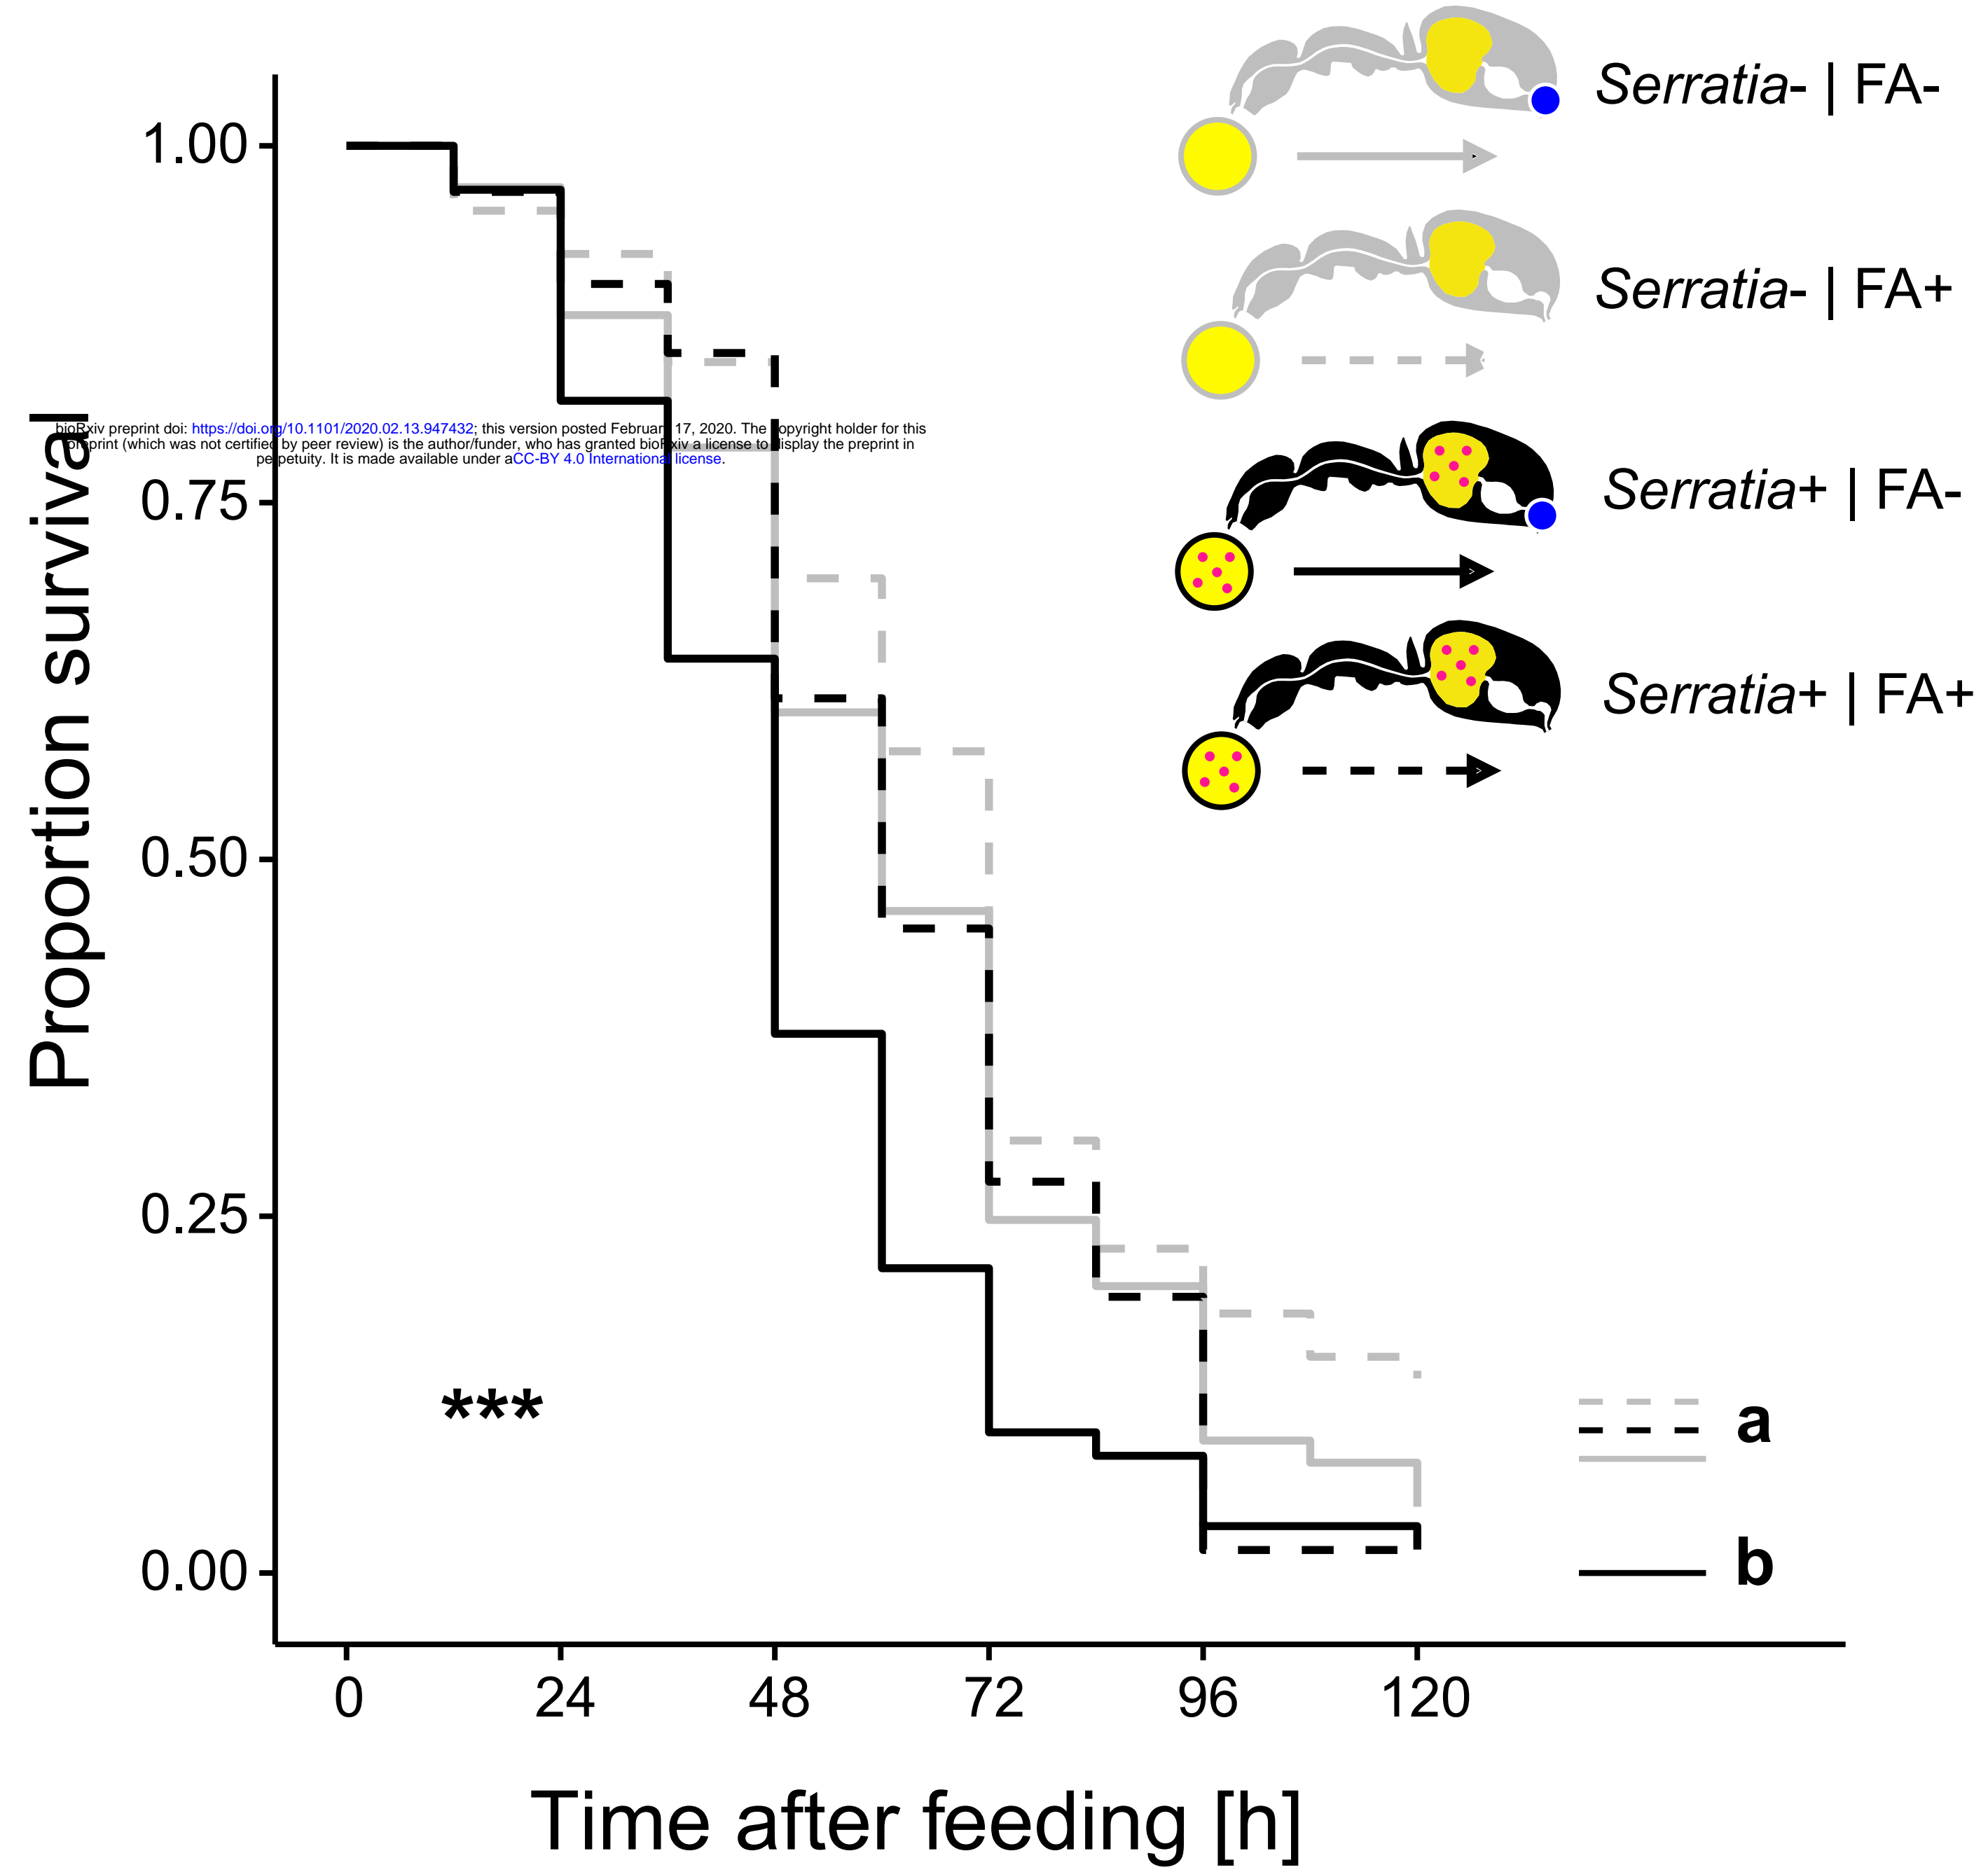**b**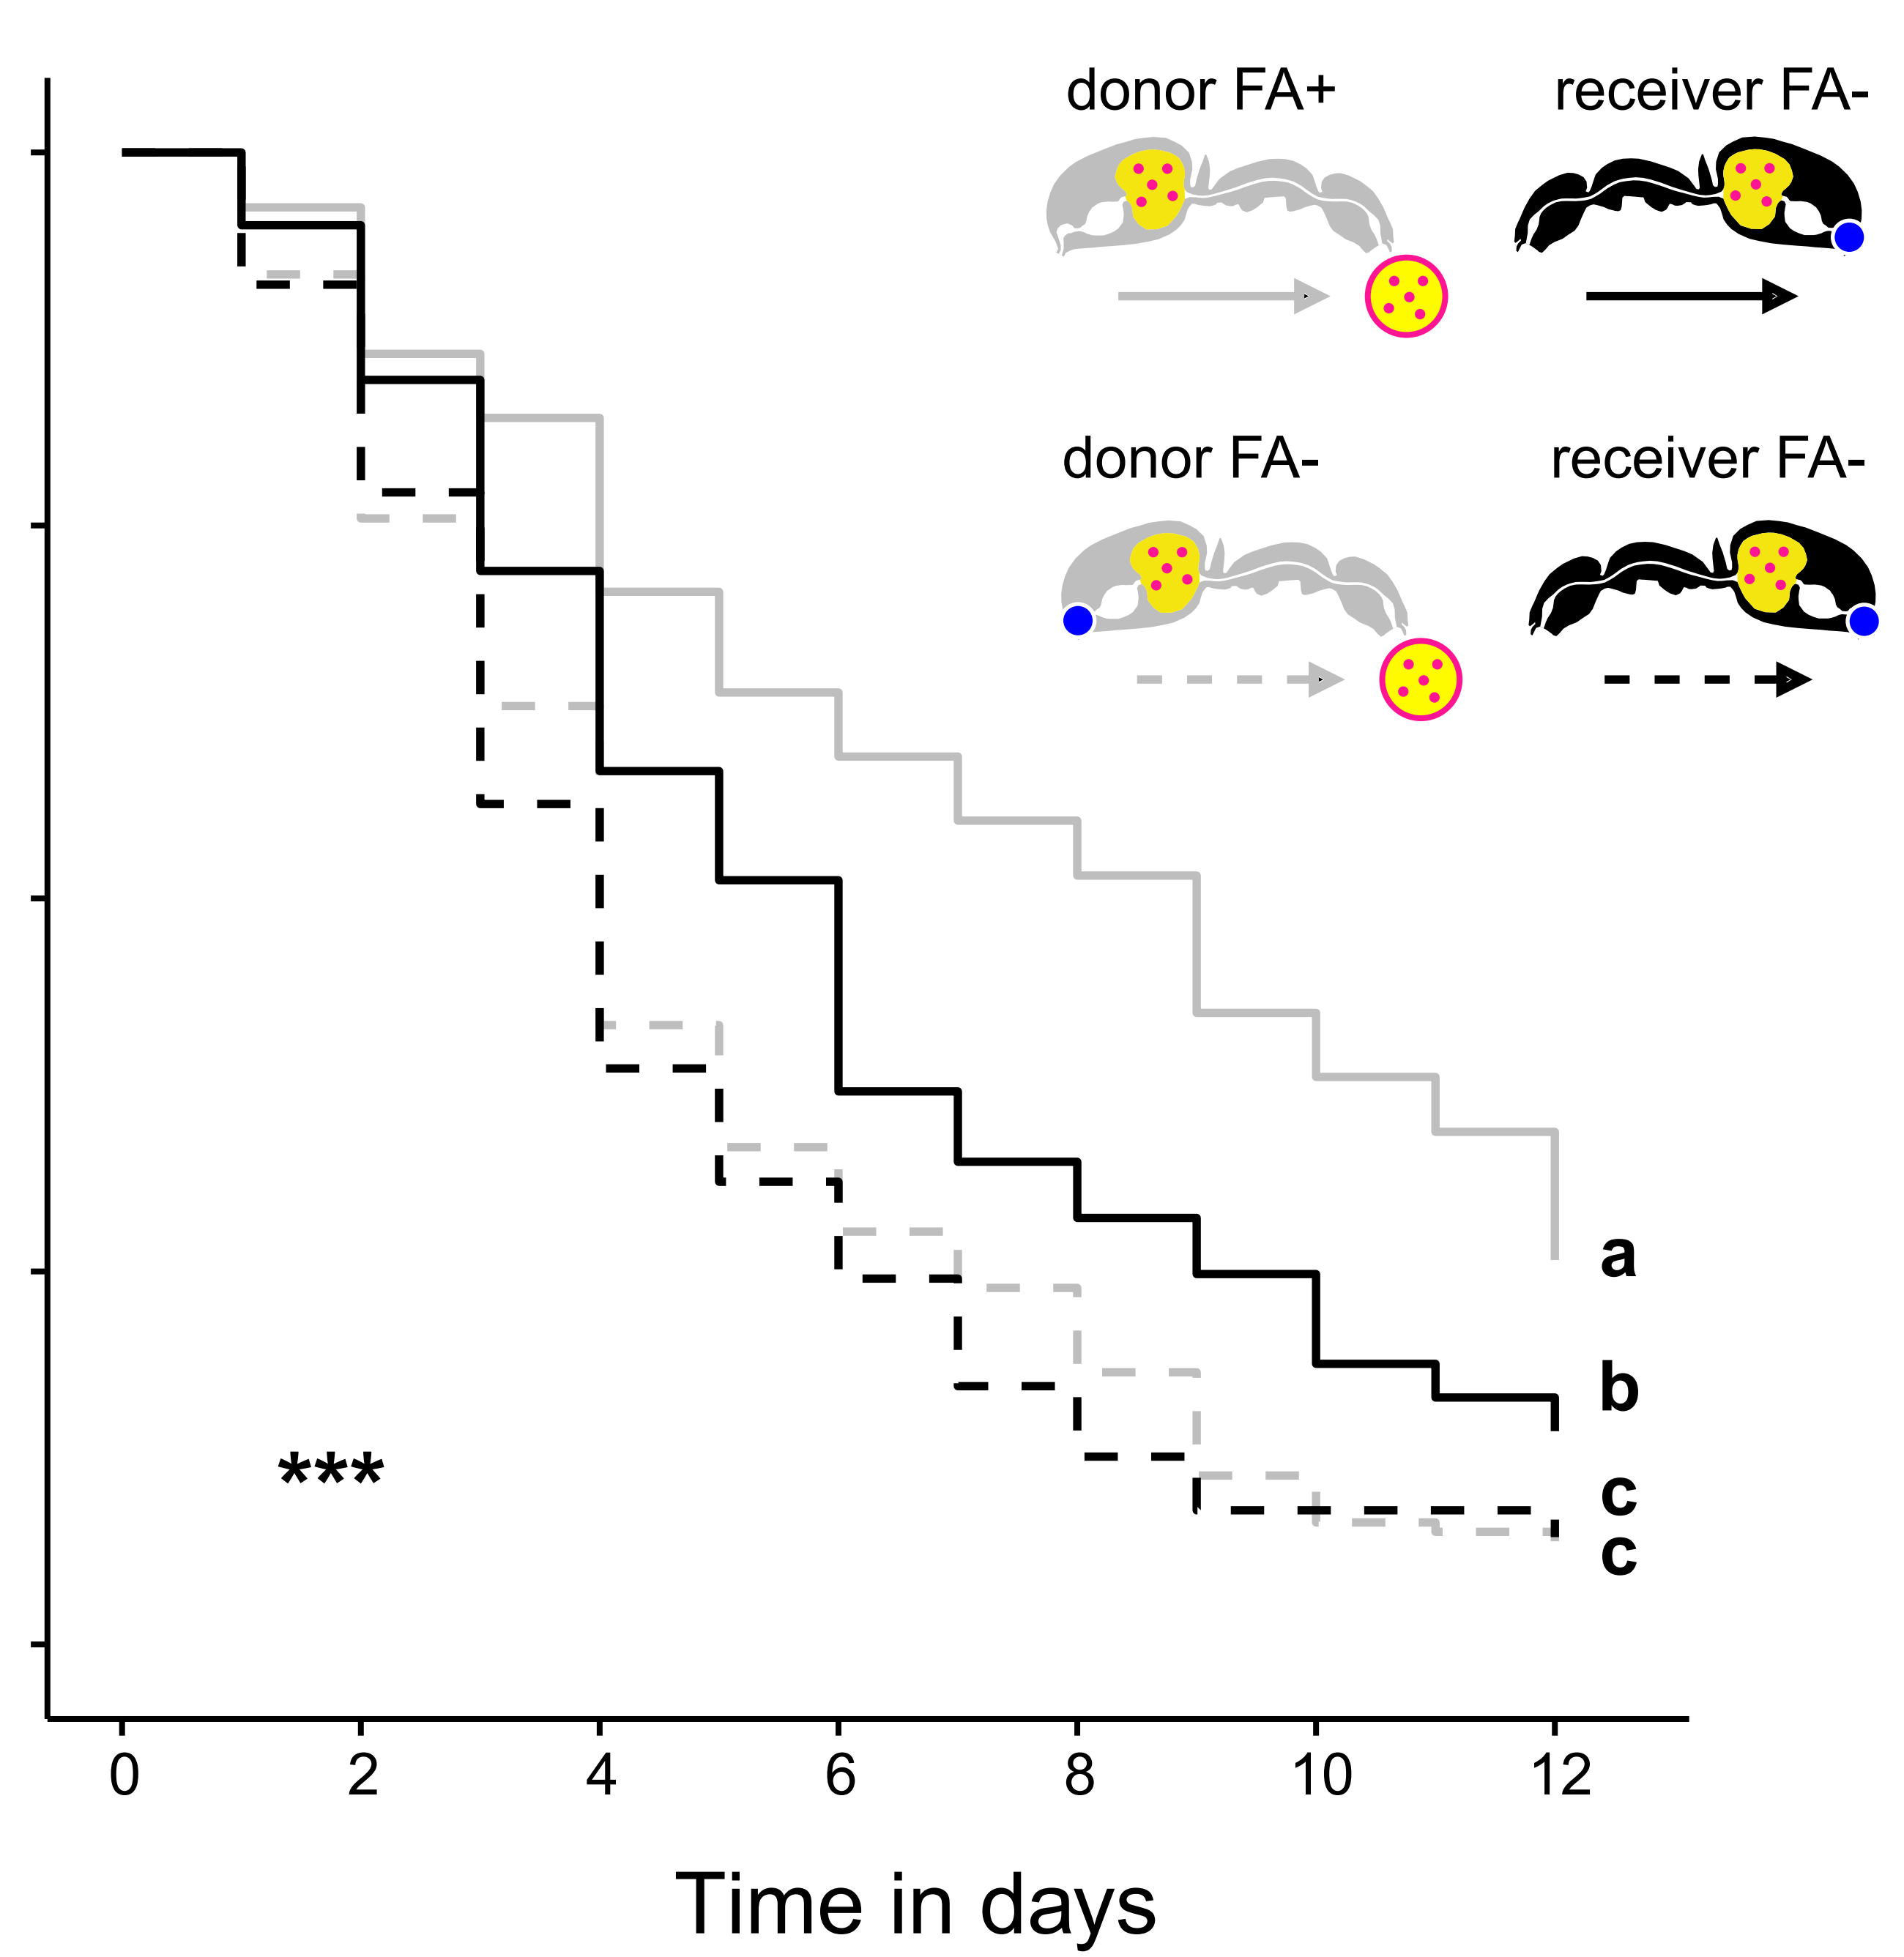

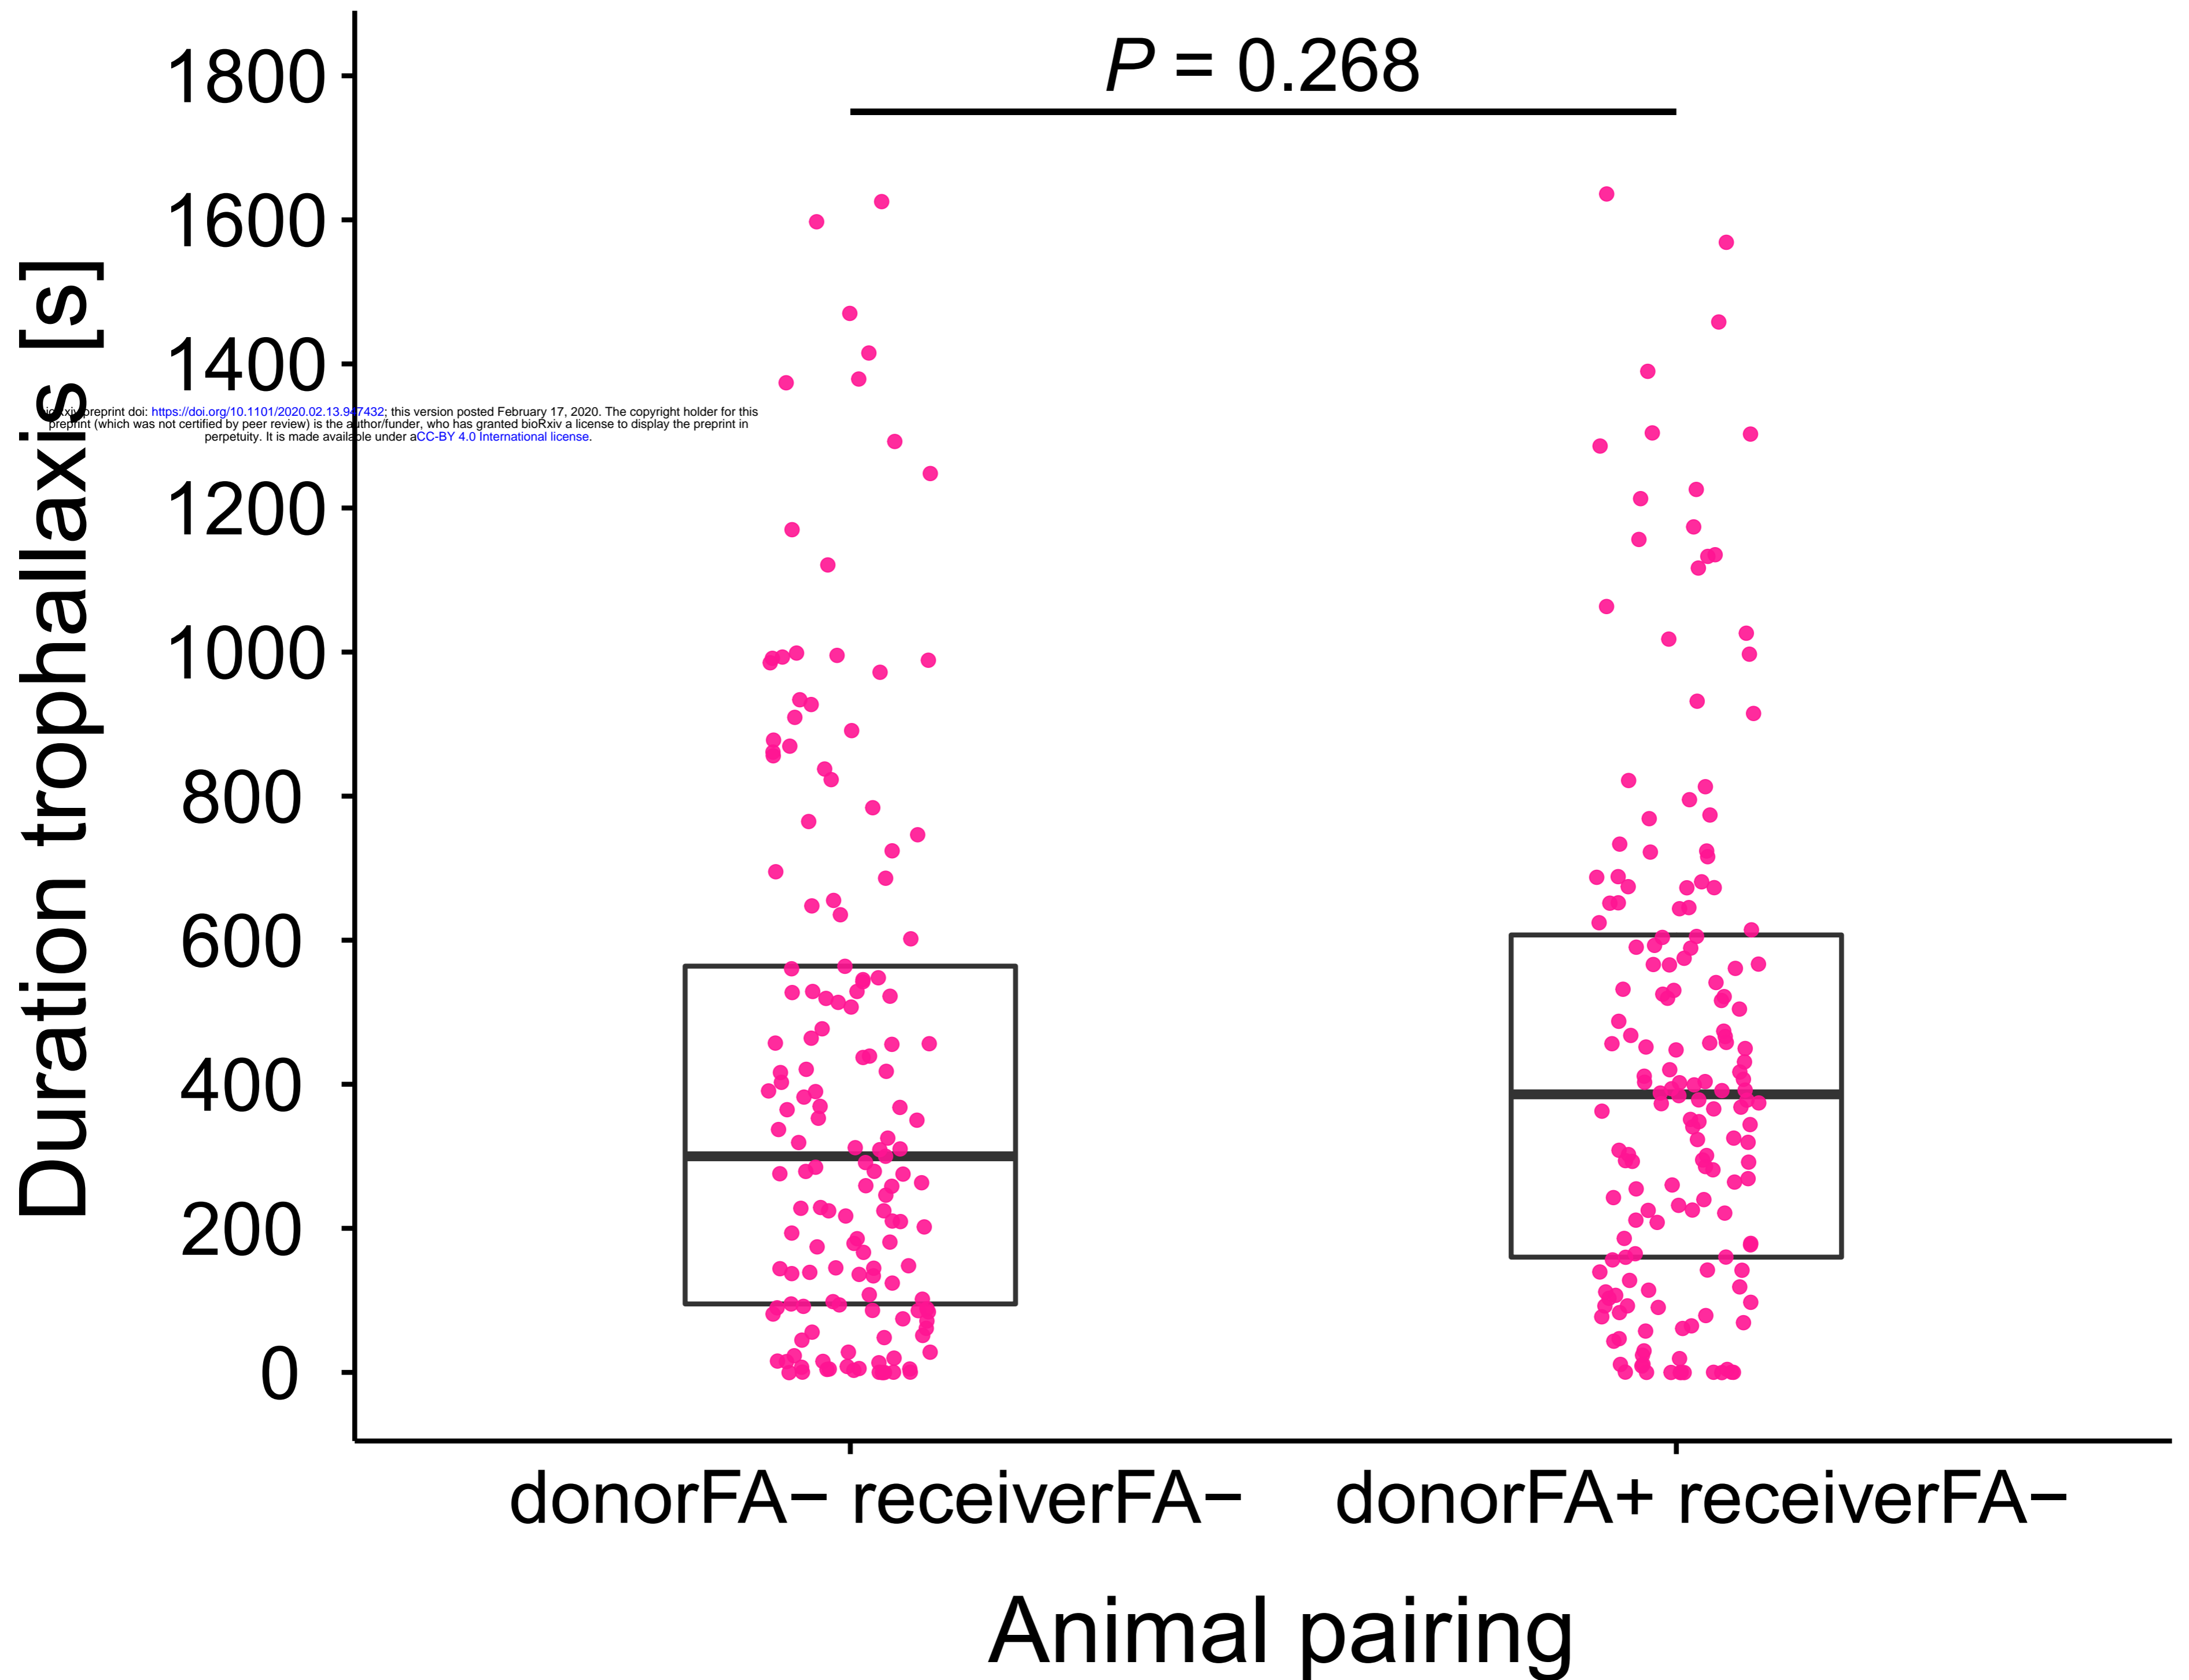

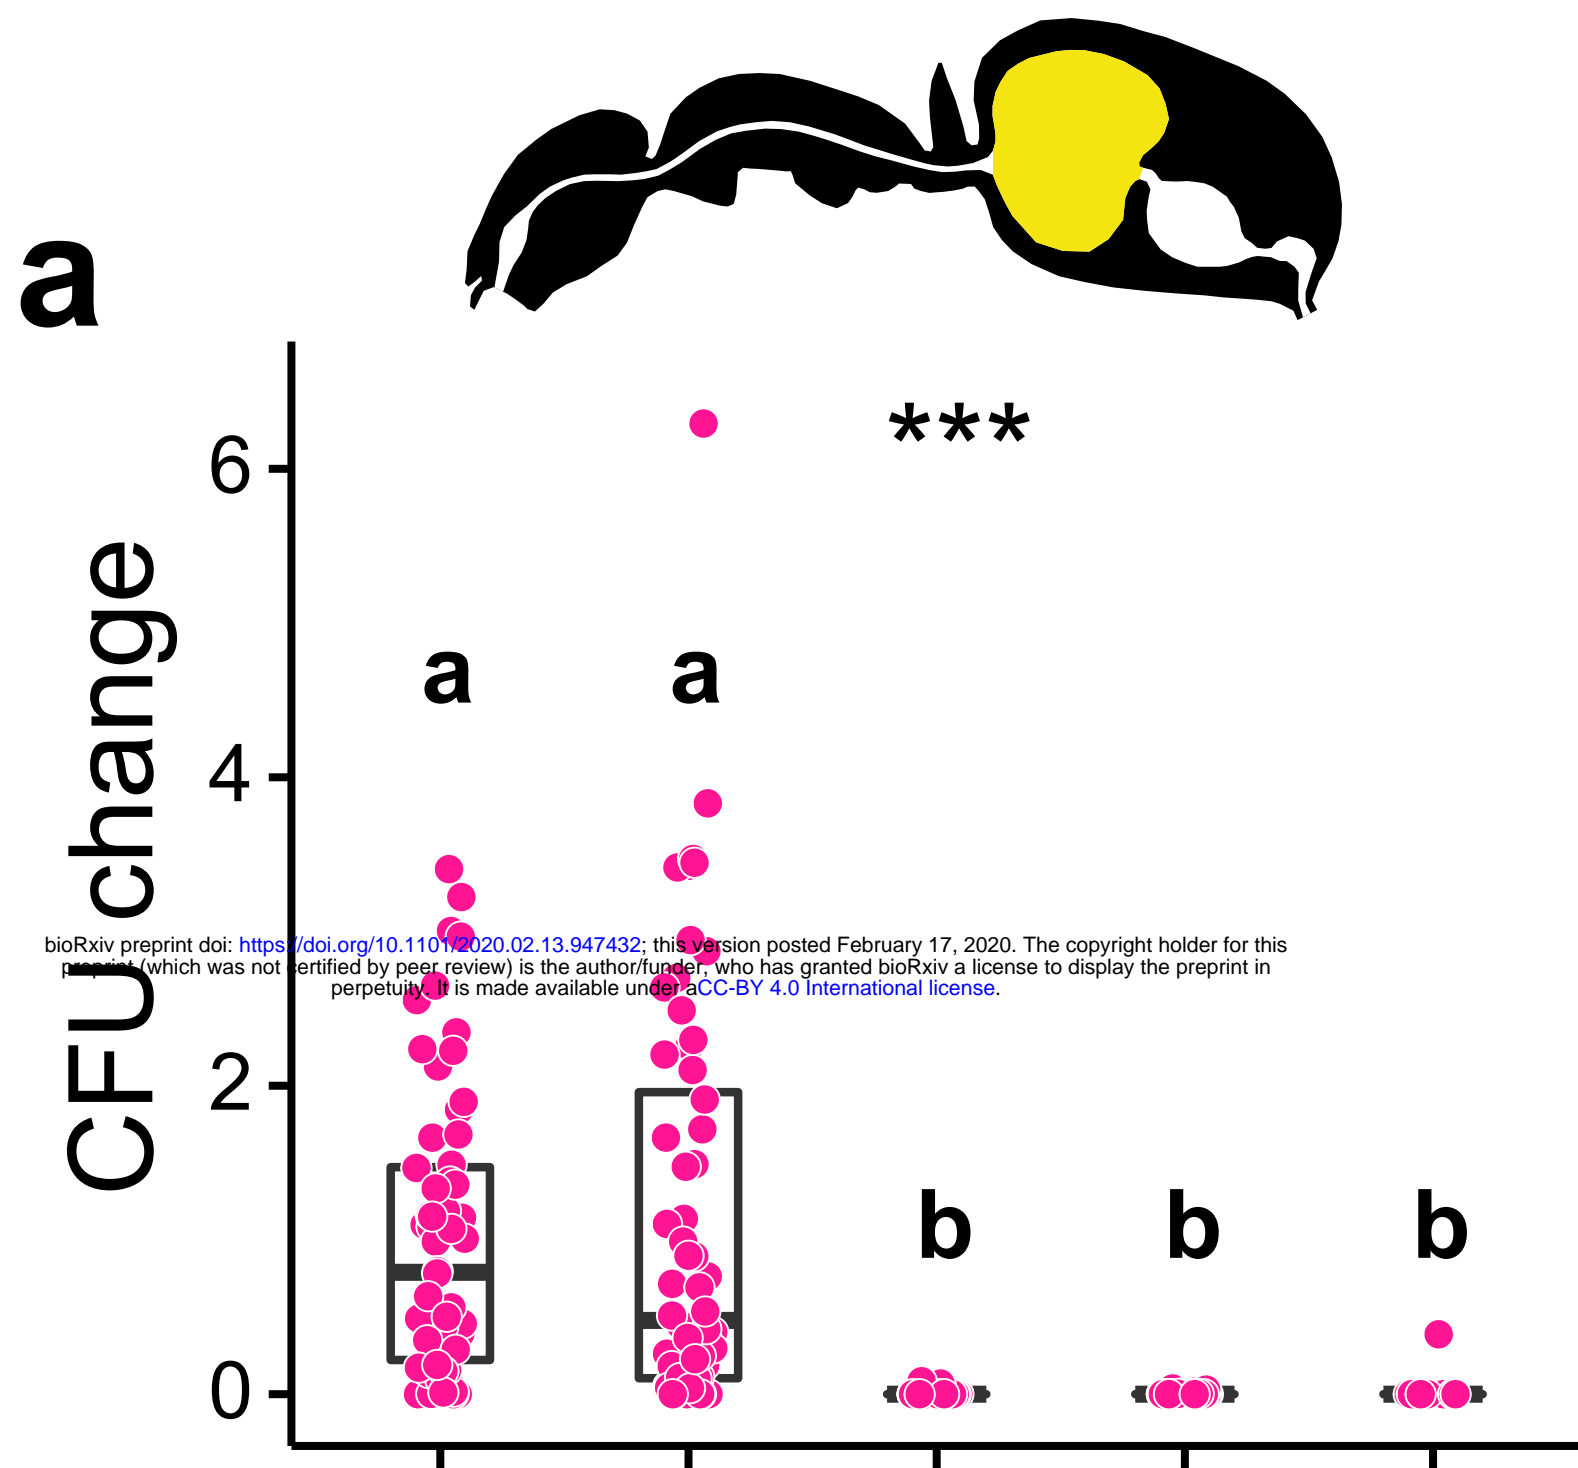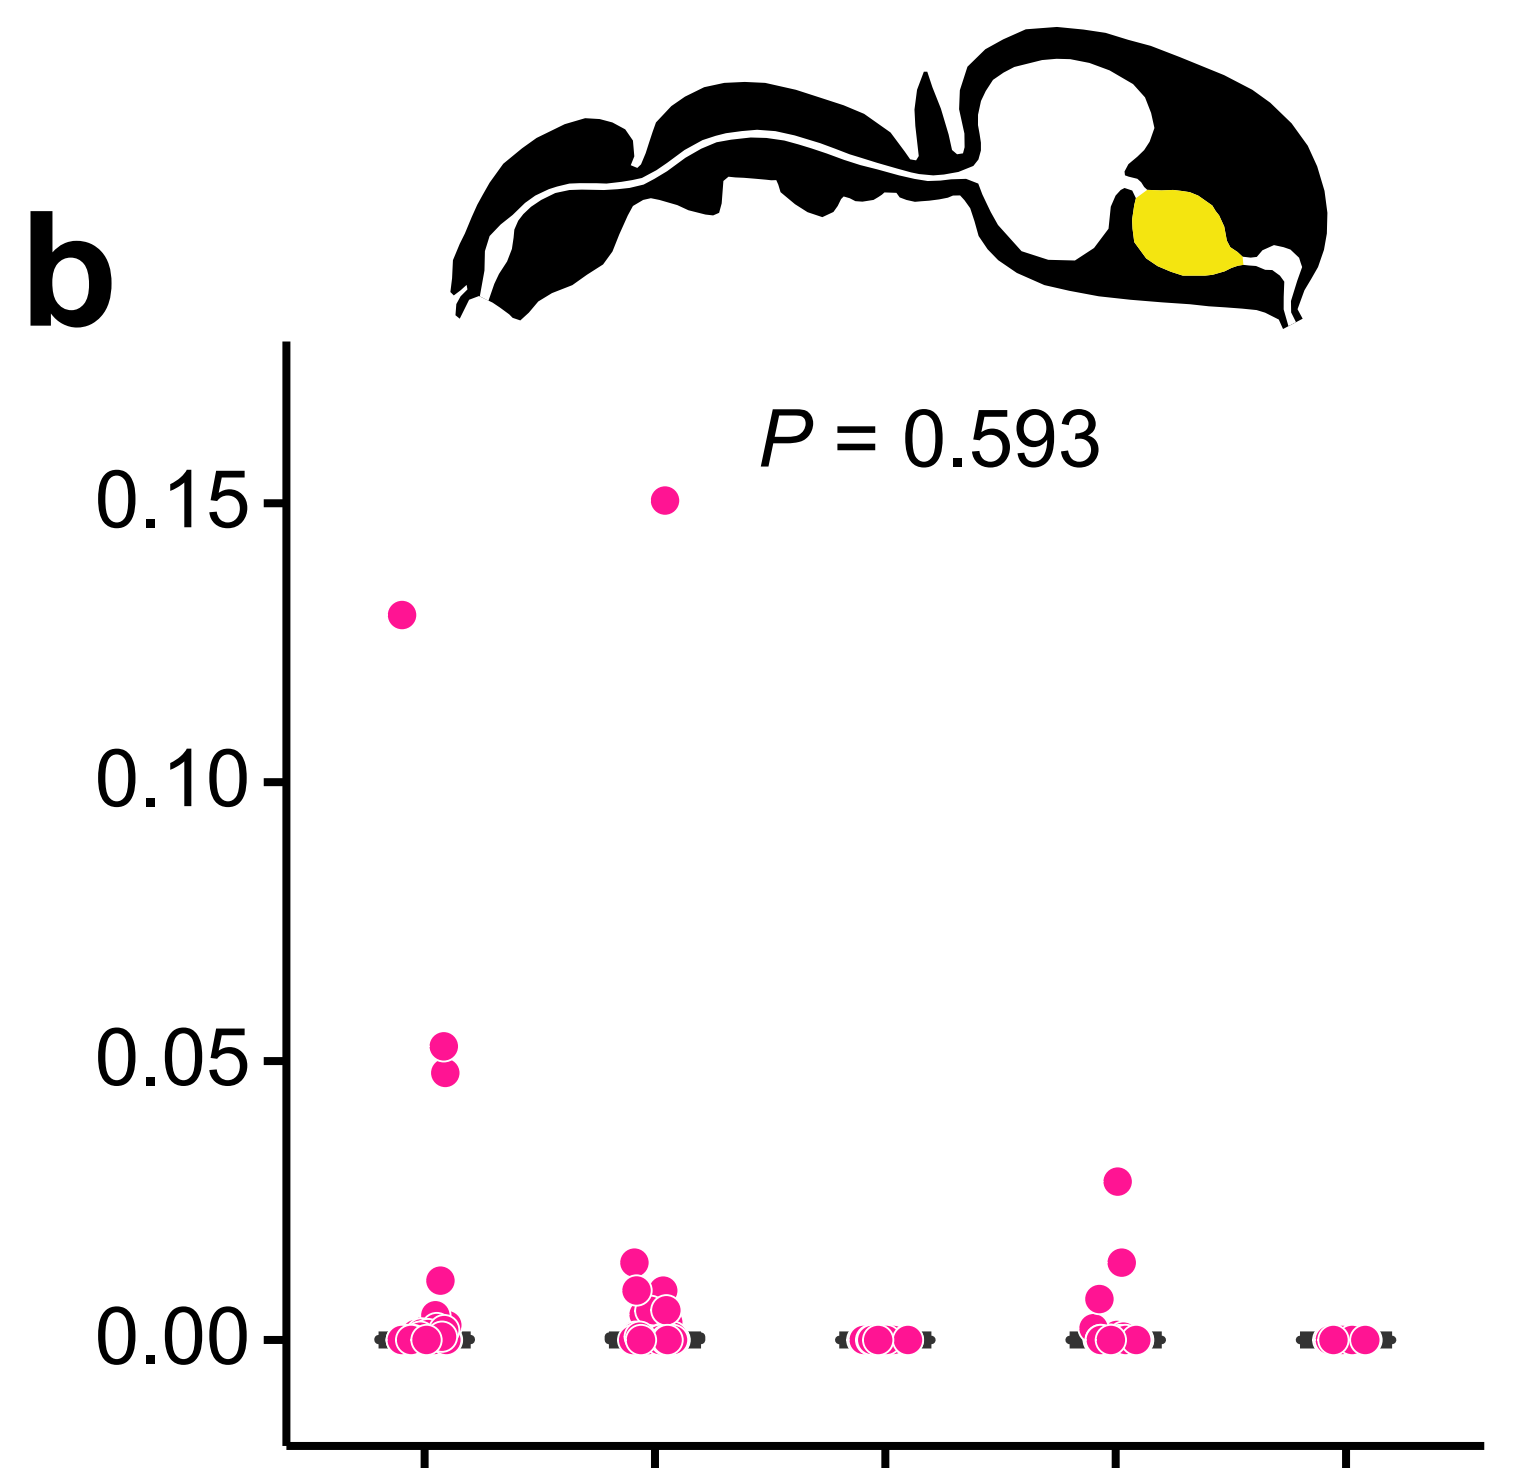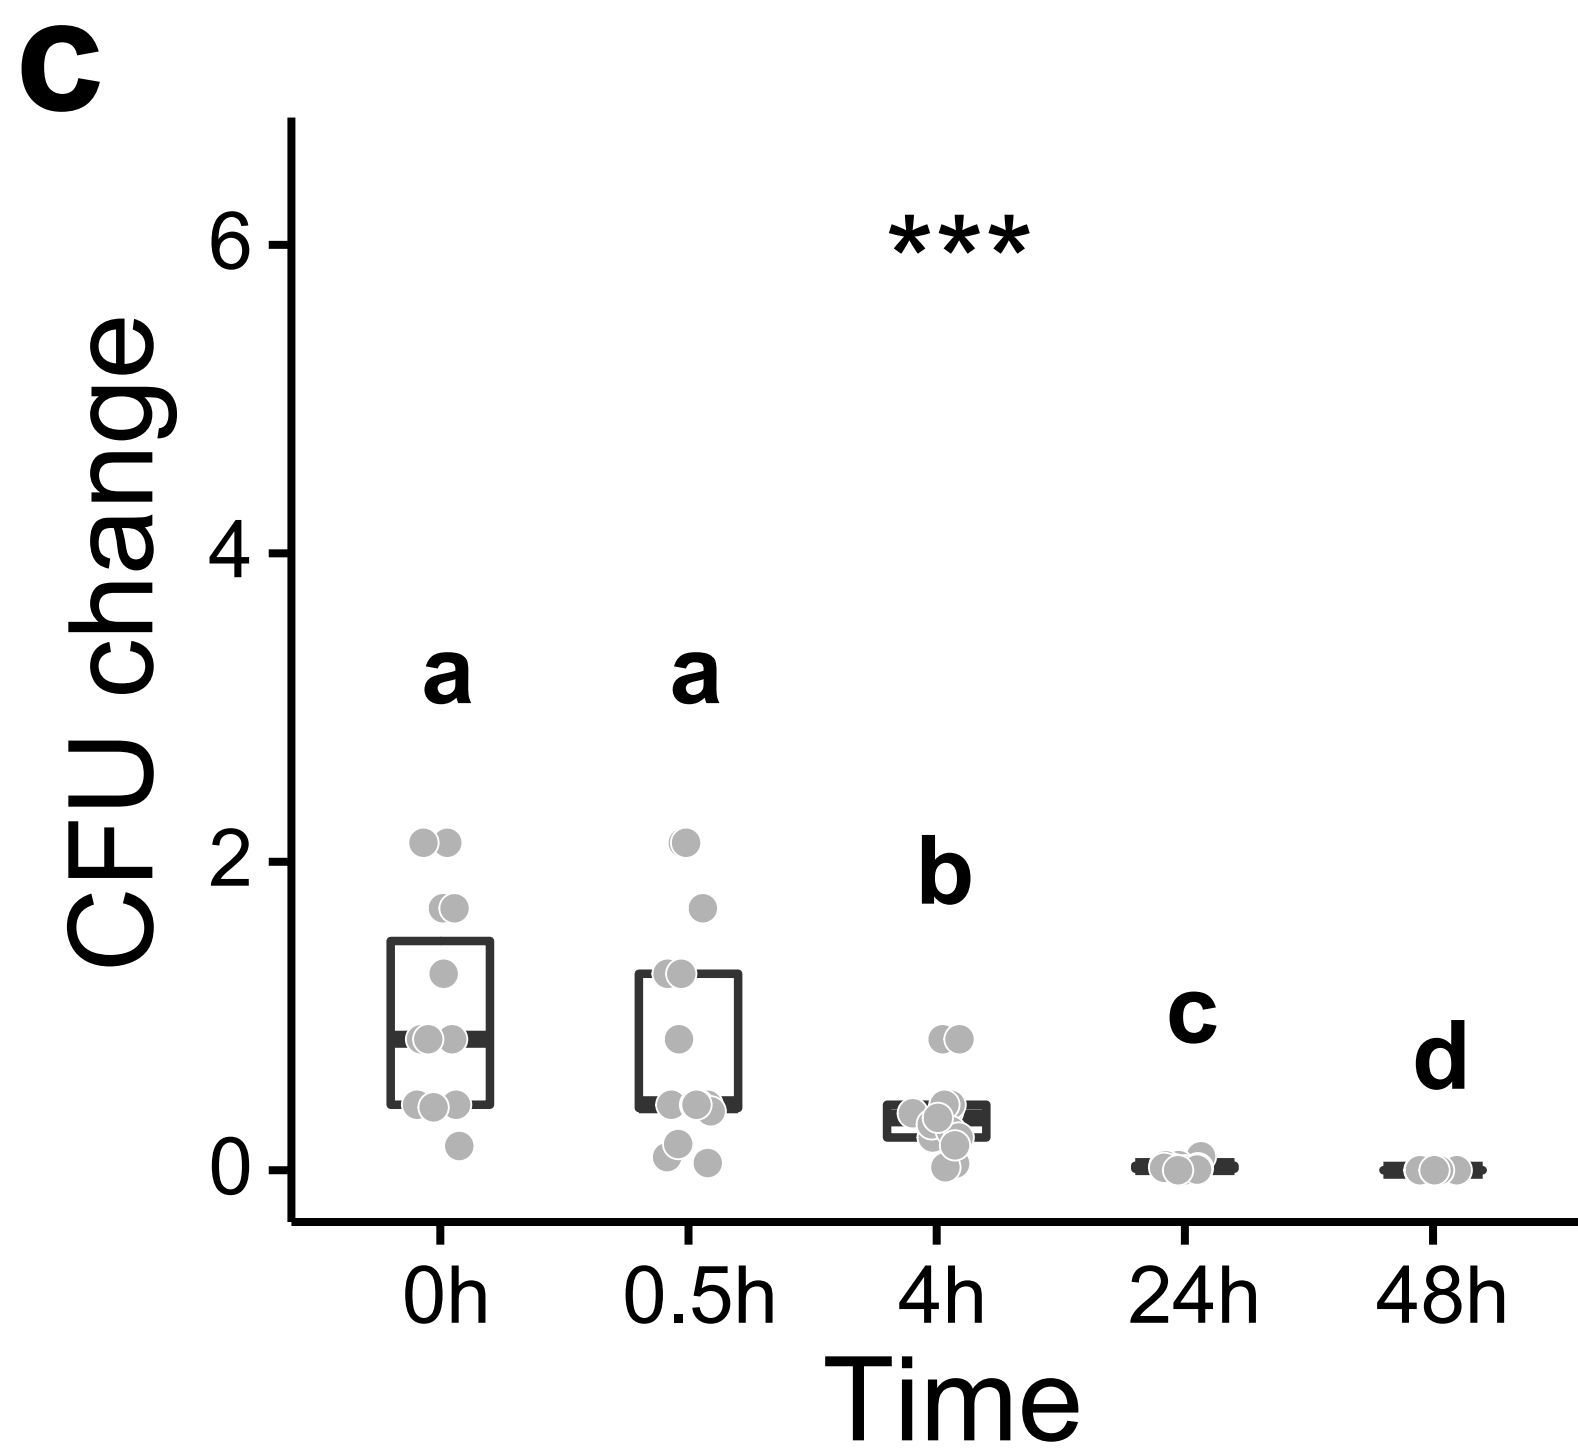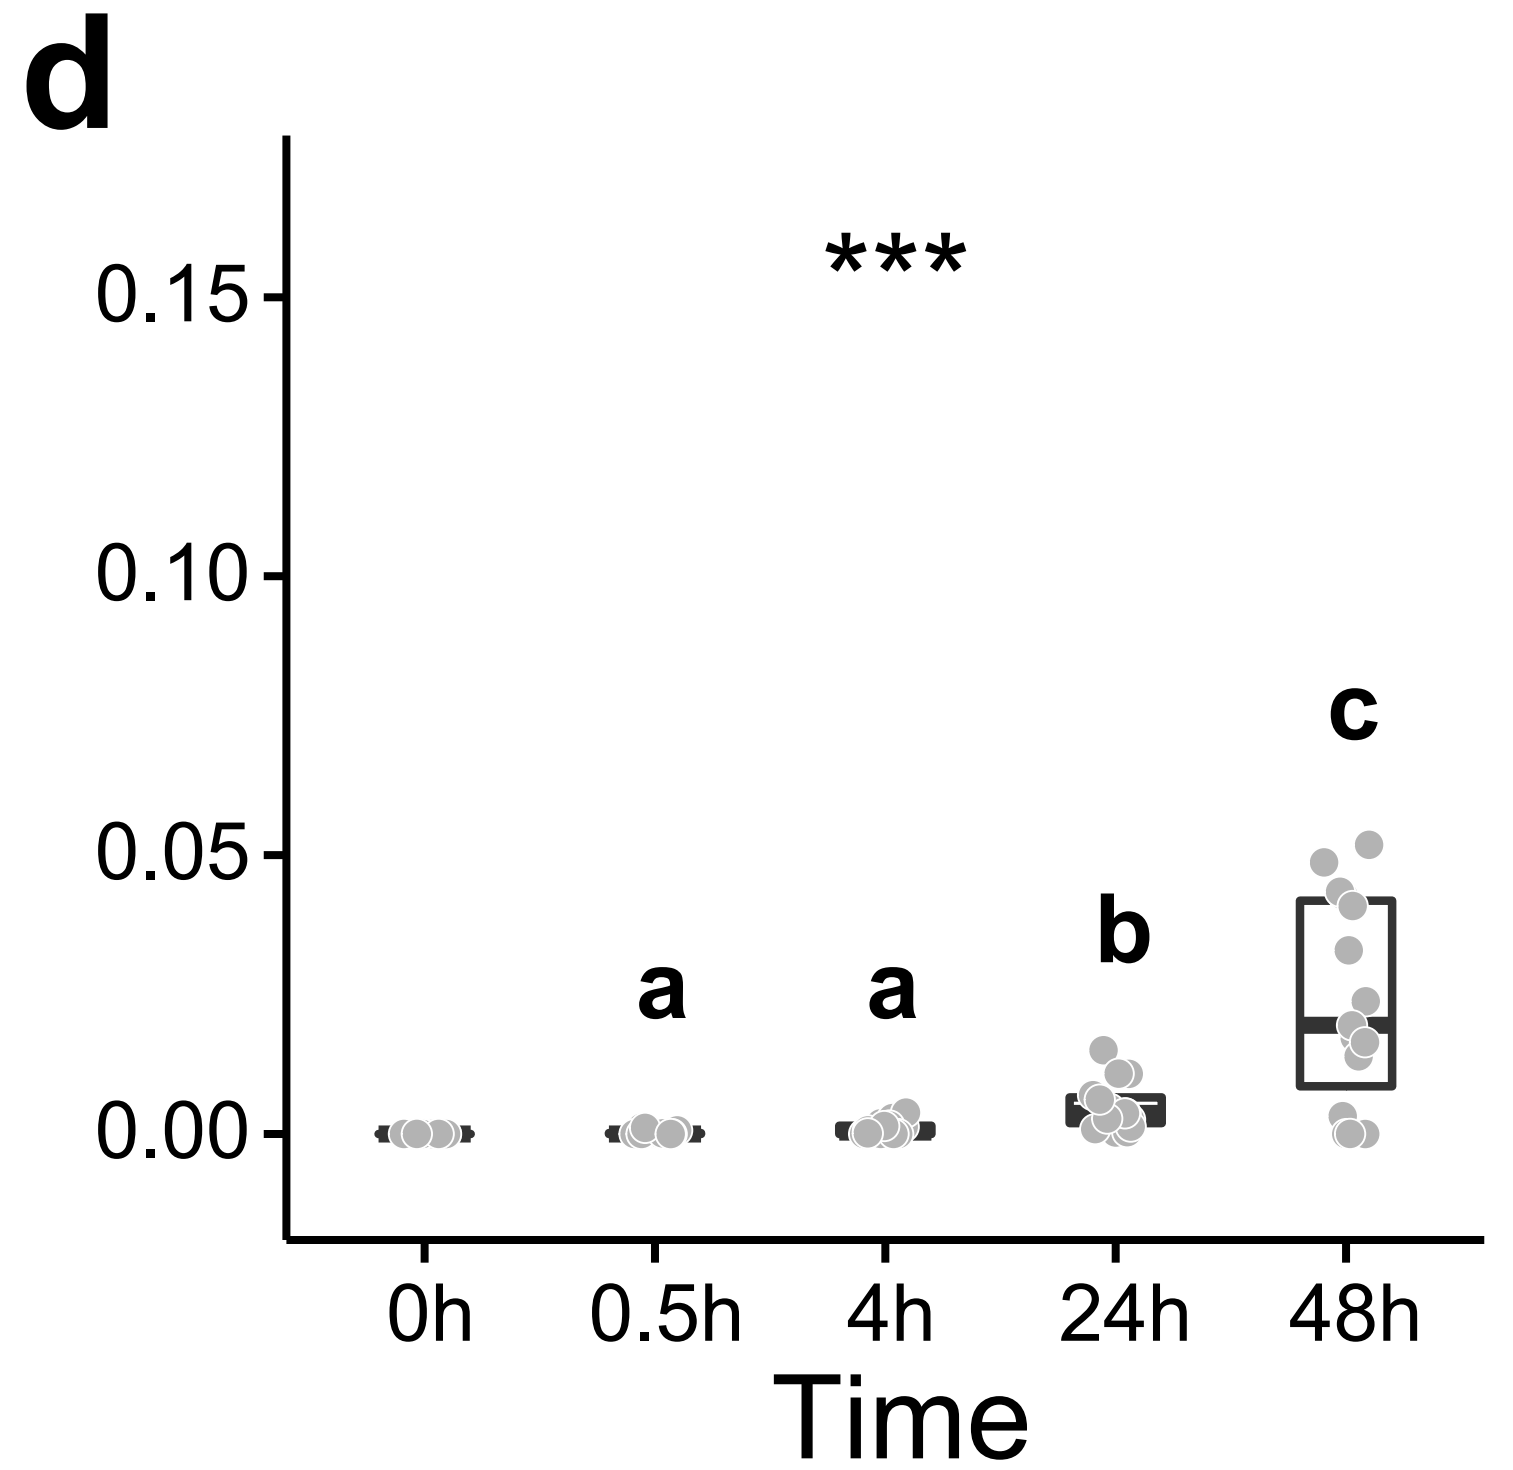



**a**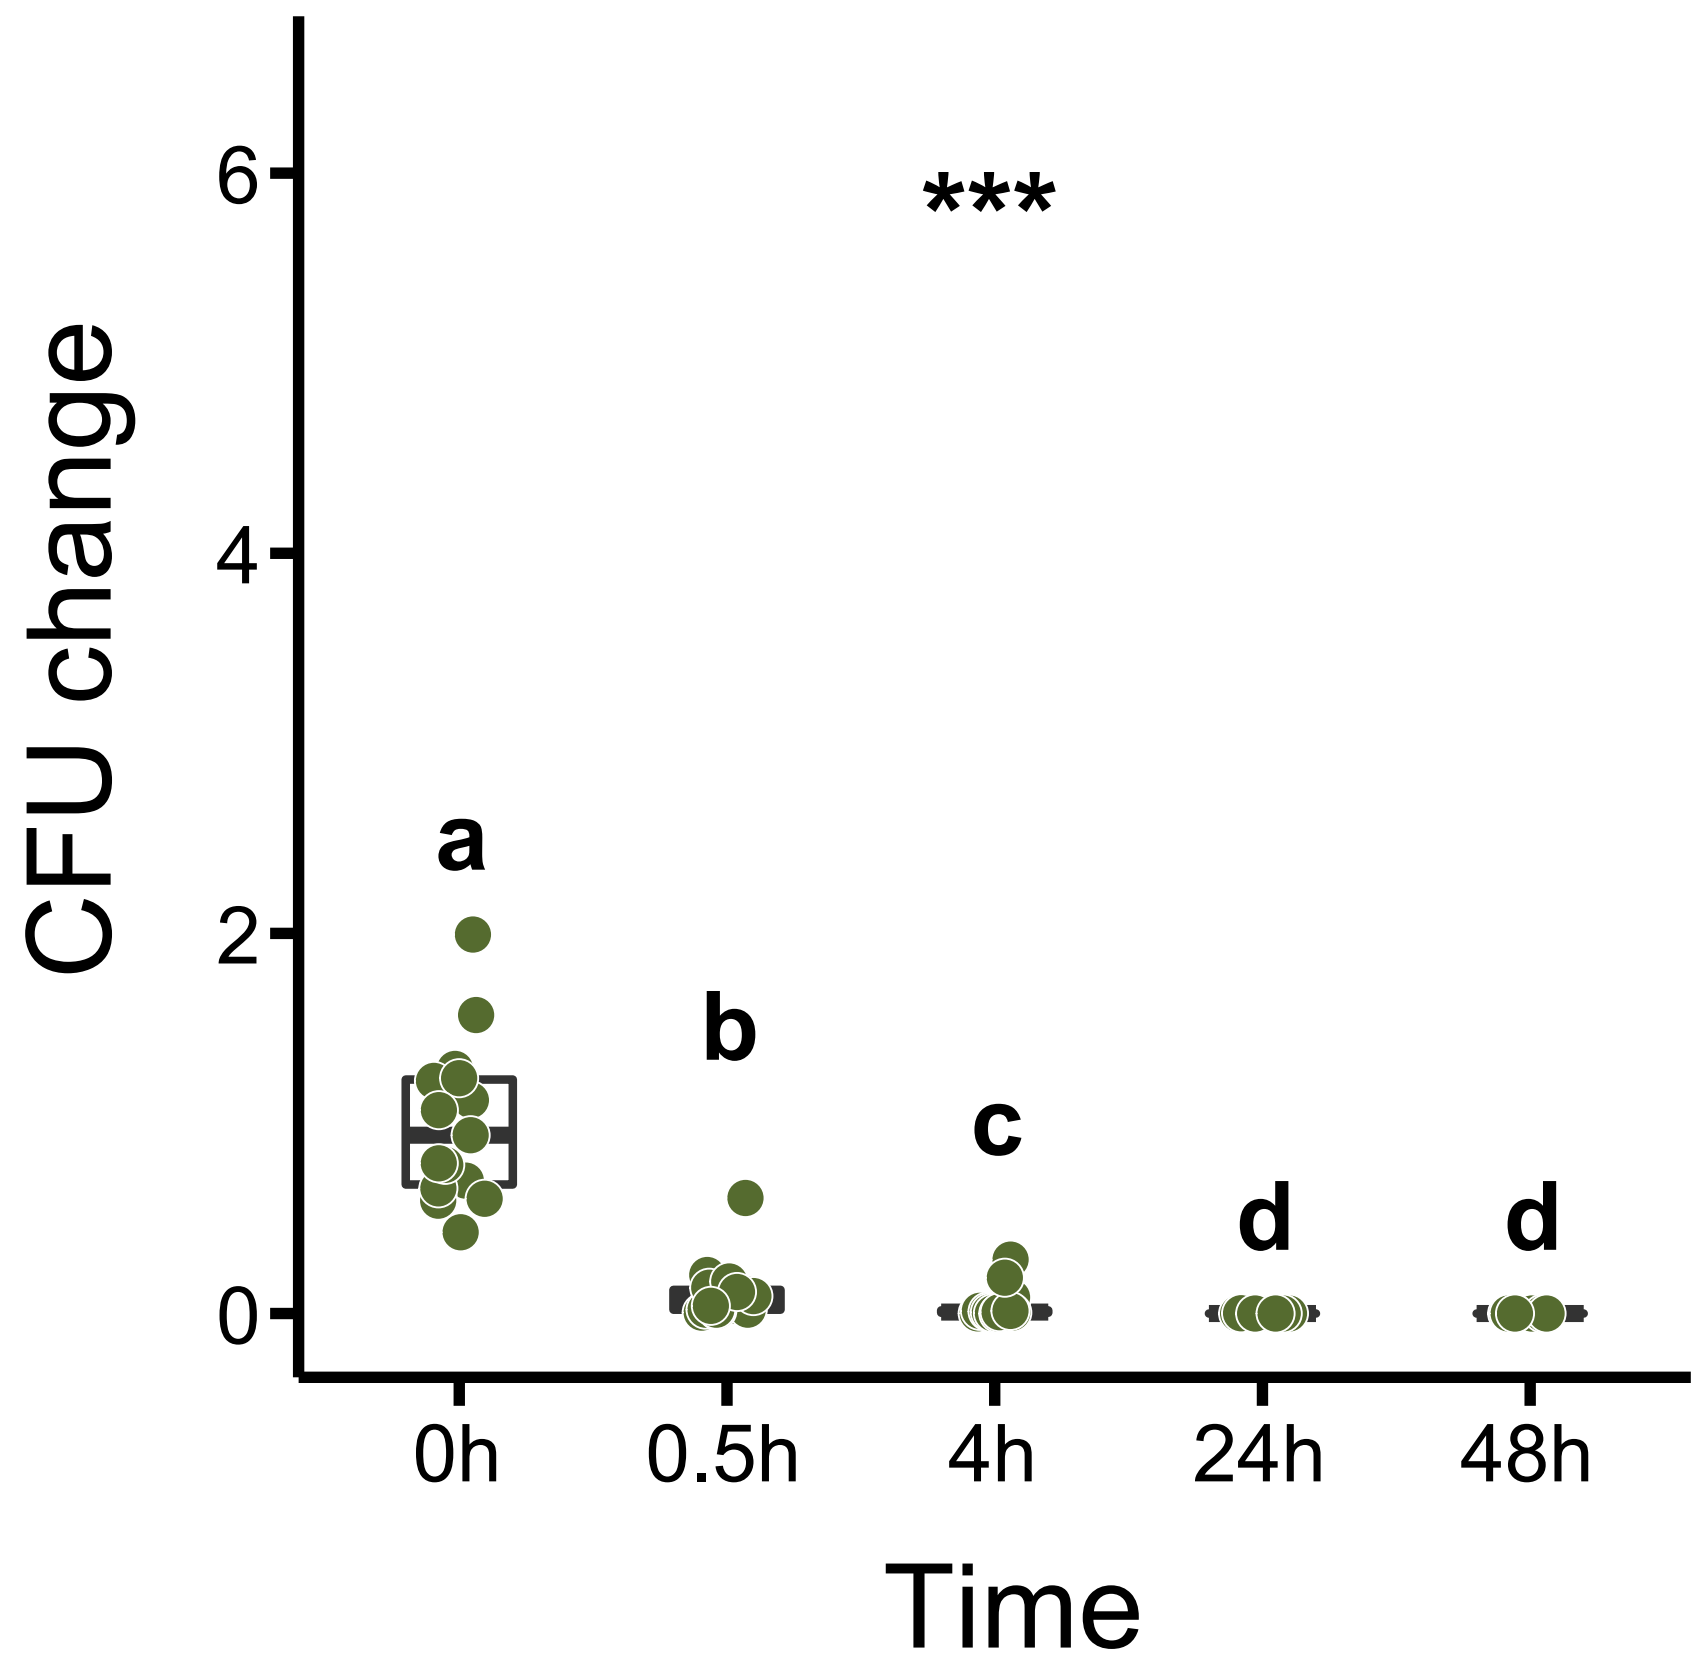**b**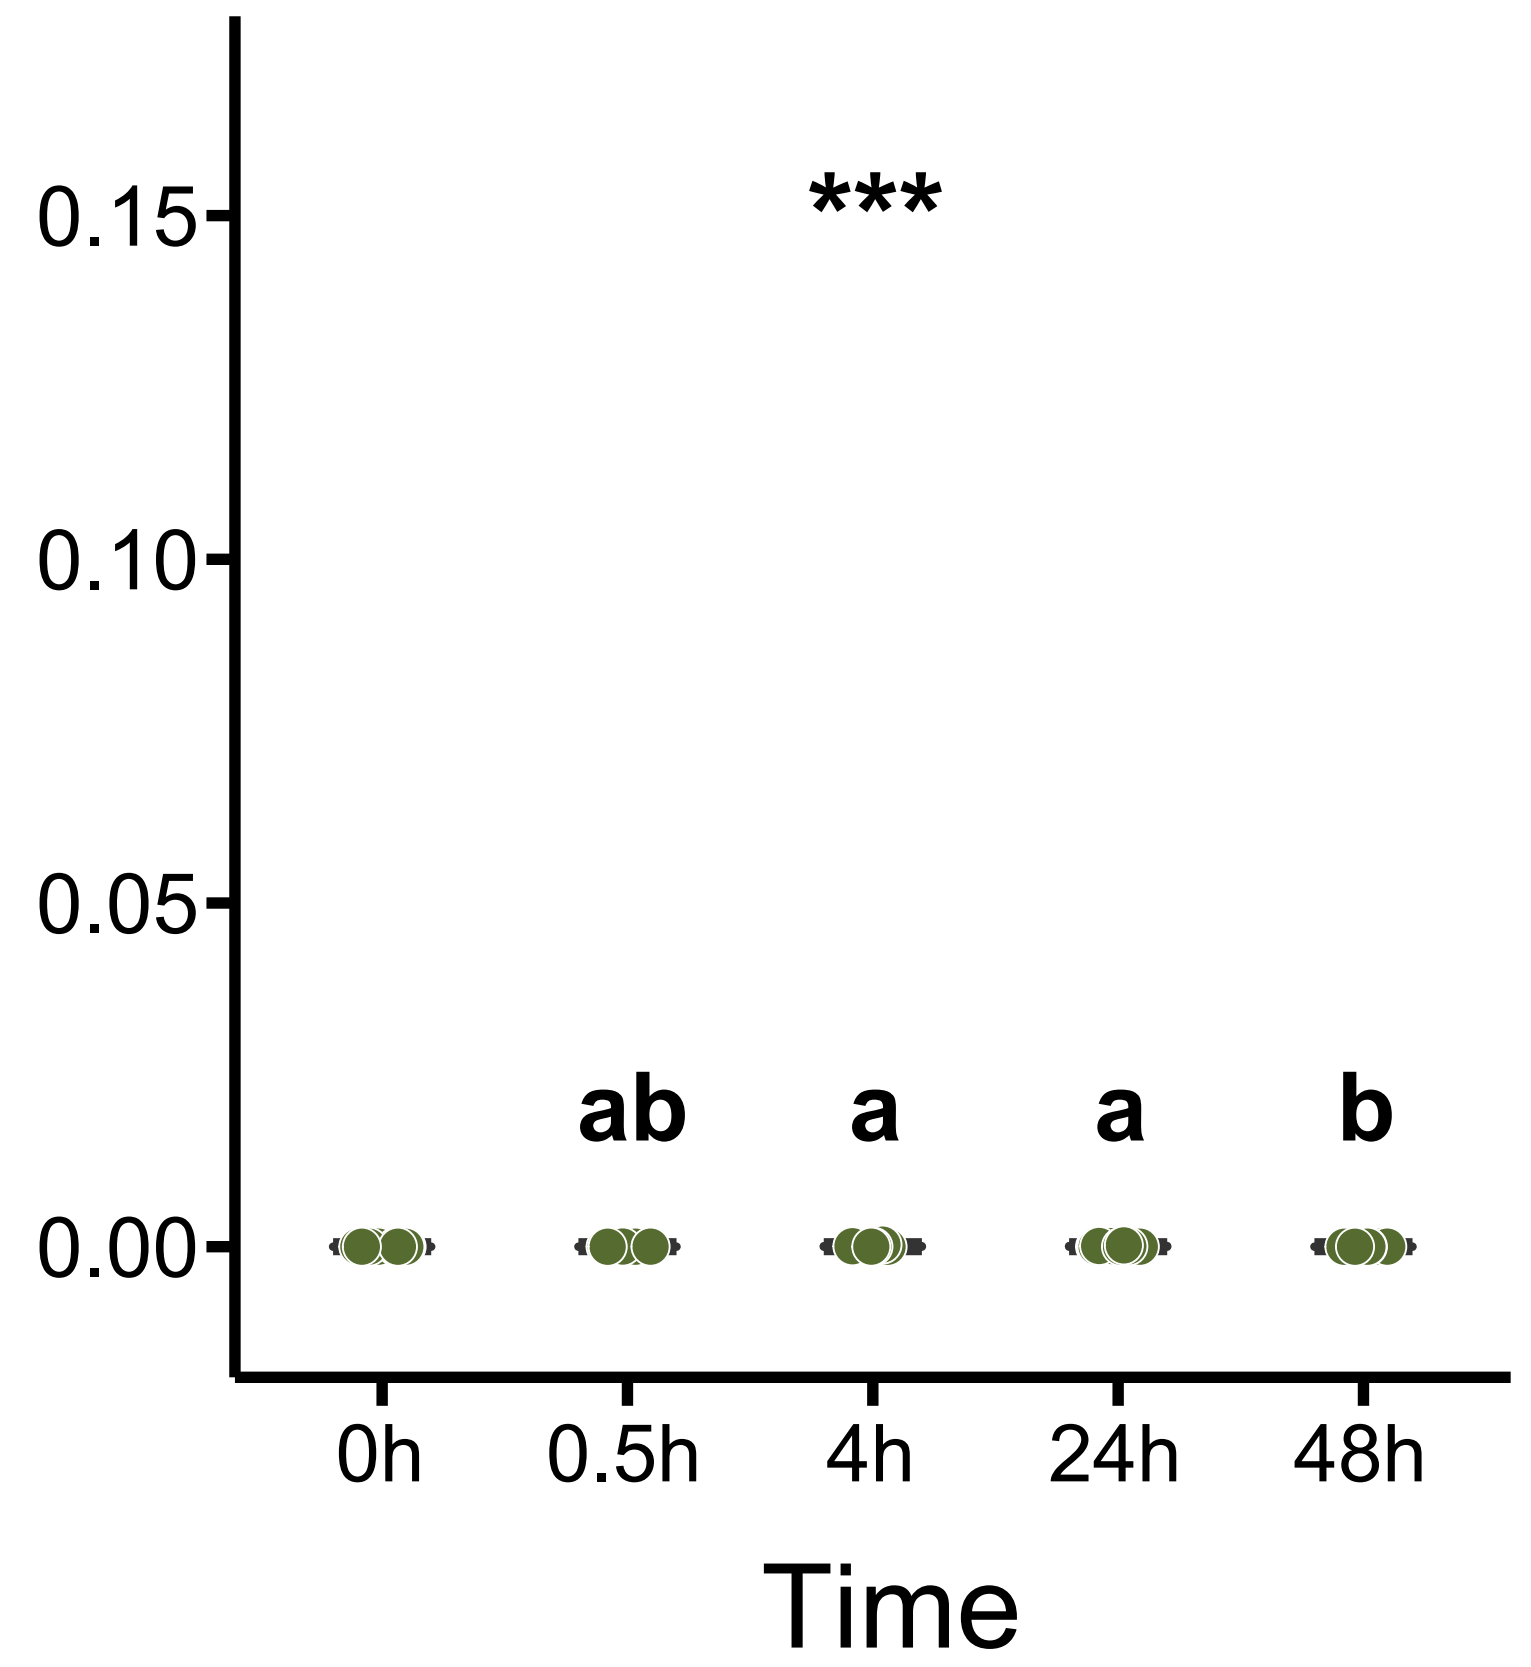

Source: https://www.biorxiv.org/content/10.1101/2020.02.13.947432v1.full.pdf
